# Supplementary material for: VIM proteins regulate transcription exclusively through the MET1 cytosine methylation pathway
Source: PubMed Central journal article supplement — Epigenetics. 2014 Apr 24;9(7):980–6. doi: 10.4161/epi.28906 (PMC4143413; doi:10.4161/epi.28906), 2014-04-24
Supplement: epi-9-980-s01.pdf [file epi-9-980-s01.pdf]

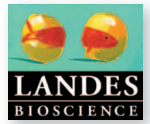

## **Supplemental Material to:**

**Molly S Shook and Eric J Richards**

**VIM proteins regulate transcription exclusively  
through the MET1 cytosine methylation pathway**

**Epigenetics 2014; 9(7)**

**<http://dx.doi.org/10.4161/epi.28906>**

**[http://www.landesbioscience.com/journals/epigenetics/  
article/28906/](http://www.landesbioscience.com/journals/epigenetics/article/28906/)**

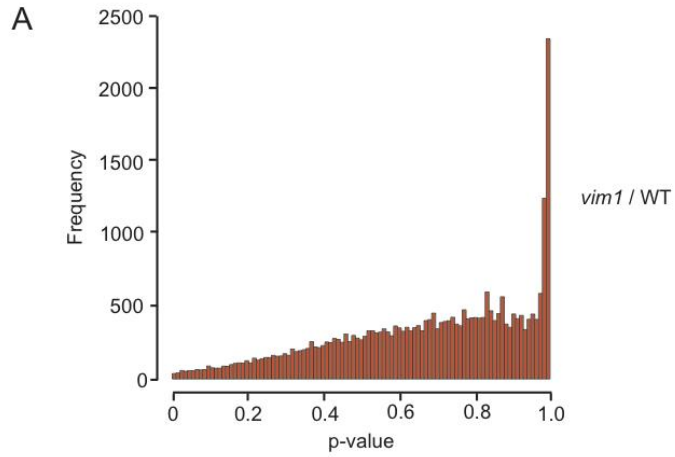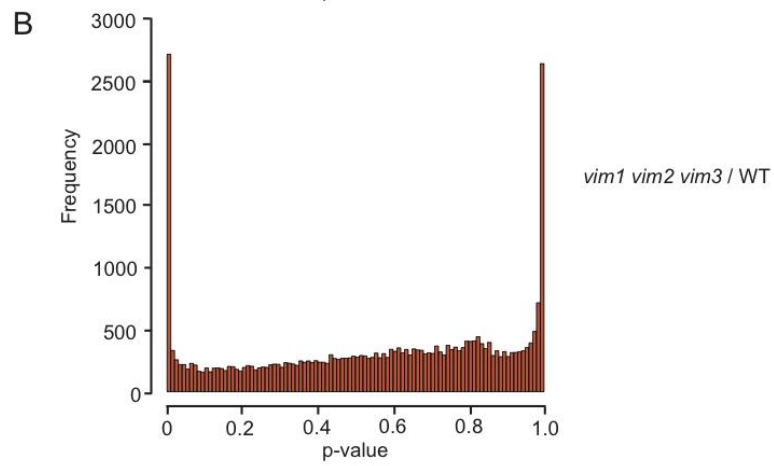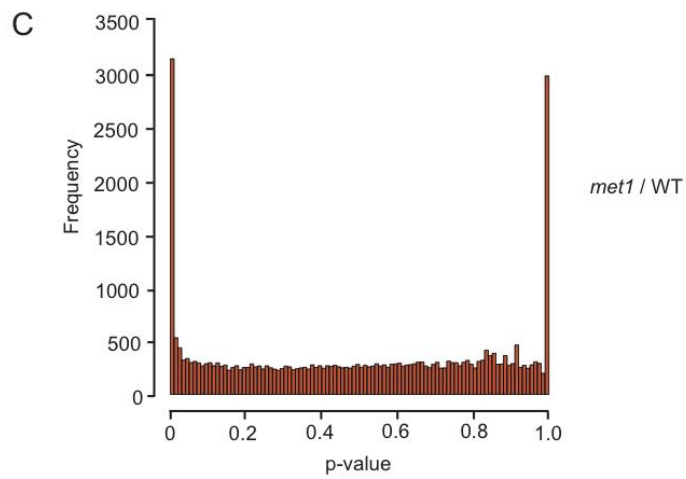

**Figure S1. Distribution of p-values from differential expression tests.** The p-values from each differential expression analysis, indicated to the right of each histogram, were divided into 100 bins and their frequencies were plotted. The large peak of p-values at 1 reflects the sets of transcripts with low read count numbers. In the *vim1 vim2 vim3* (B) and *met1* mutant (C) analyses, additional peaks near zero indicate large numbers of significantly differentially expressed genes. The remaining p-values are approximately uniformly distributed, as expected under the null hypothesis.

**A**

| <i>vim1 vim2 vim3</i> -specific | <i>met1</i> -specific |
|---------------------------------|-----------------------|
| AT1G68600                       | AT2TE23240            |
| AT2G02540                       | AT2G18130             |
| AT2G40960                       | AT2G44290             |
| AT4G11211                       | AT2G47520             |
| AT4G18340                       | AT3G22370             |
| AT5G41200                       | AT4TE30225            |

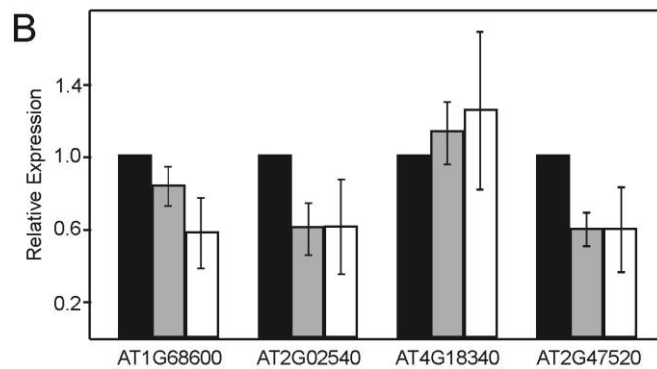

**Figure S2. Examination of selected transcripts identified as *vim1 vim2 vim3*- or *met1*-specific in the RNA-seq analysis.** A) List of loci tested by RT-qPCR that were originally identified as differentially expressed in either *vim1 vim2 vim3* or *met1* relative to wild type. None of these loci were confirmed by RT-qPCR analysis as being *vim1 vim2 vim3*- or *met1*-specific. B) Representative RT-qPCR relative expression analysis of four of the loci listed in panel A. Similar fold changes in expression are seen in the *vim1 vim2 vim3* mutant (gray bars) and *met1* mutant (white bars) relative to wild type (black bars). Expression values represent the averages calculated from three independent biological replicates. Error bars represent the standard error of the mean.

**Supplemental File 1.** Genes and TEs differentially expressed in *vim1 vim2 vim3* vs wild type

| ID         | Log <sub>2</sub> fold change | Adjusted p-value |
|------------|------------------------------|------------------|
| AT2G29860  | -Inf                         | 0.008203331      |
| AT3G21500  | -Inf                         | 0.0122565        |
| AT3TE49325 | -Inf                         | 0.000146861      |
| AT5G42430  | -Inf                         | 0.024192331      |
| AT1TE41815 | -Inf                         | 0.008105924      |
| AT1G77870  | -6.40937                     | 8.31E-29         |
| AT1G23720  | -5.81429                     | 0.002238718      |
| AT2TE22815 | -5.36113                     | 2.34E-05         |
| AT1G47840  | -4.68252                     | 2.64E-08         |
| AT1G51490  | -4.65551                     | 0.010215776      |
| AT4G08991  | -4.59549                     | 0.021151569      |
| AT4TE10320 | -4.33348                     | 1.45E-10         |
| AT2G36490  | -4.20151                     | 6.88E-21         |
| AT4G00080  | -4.15187                     | 0.006450063      |
| AT1G57820  | -3.9995                      | 3.42E-28         |
| AT5G07690  | -3.92295                     | 0.03833353       |
| AT1G77880  | -3.83516                     | 5.38E-05         |
| AT1G16410  | -3.71719                     | 0.001999973      |
| AT1G49790  | -3.5747                      | 0.000204646      |
| AT5TE48460 | -3.57046                     | 0.000628619      |
| AT4TE21095 | -3.51191                     | 0.007043929      |
| AT1G52000  | -3.48557                     | 2.25E-14         |
| AT1G34095  | -3.40717                     | 4.86E-07         |
| AT5G55410  | -3.36593                     | 0.01881912       |
| AT3G03190  | -3.27523                     | 1.36E-05         |
| AT3G42473  | -3.24191                     | 0.002707751      |
| AT5G17740  | -3.18006                     | 0.0002036        |
| AT1G23940  | -3.16812                     | 1.52E-09         |
| AT5G39550  | -3.09415                     | 1.57E-15         |
| AT5G35390  | -3.05976                     | 0.031717641      |
| AT5G14200  | -3.03112                     | 0.003053636      |
| AT2G43100  | -3.01526                     | 0.017075912      |
| AT4G35610  | -3.00828                     | 0.01680439       |
| AT5G23010  | -2.97672                     | 2.02E-15         |
| AT1G60410  | -2.95661                     | 0.000965751      |
| AT4TE42860 | -2.94243                     | 3.13E-05         |
| AT1G62560  | -2.92107                     | 0.027140472      |
| AT3G19710  | -2.90233                     | 0.006456881      |
| AT2G02540  | -2.89775                     | 3.05E-06         |
| AT4G06701  | -2.89475                     | 5.48E-05         |
| AT1G02952  | -2.87904                     | 0.000146861      |
| AT5G59930  | -2.84815                     | 0.007603129      |
| AT4G16892  | -2.83004                     | 0.000317935      |
| AT4G10060  | -2.7325                      | 2.96E-10         |
| AT3G16460  | -2.72094                     | 1.74E-09         |
| AT2G15128  | -2.7186                      | 0.000870599      |

|            |          |             |
|------------|----------|-------------|
| AT1G23935  | -2.7063  | 0.00221356  |
| AT1G49290  | -2.69284 | 1.35E-05    |
| AT2TE08840 | -2.65987 | 0.044739869 |
| AT3TE65375 | -2.57004 | 0.000119443 |
| AT2G29170  | -2.55152 | 0.032963961 |
| AT5G45150  | -2.54818 | 1.38E-05    |
| AT2G41850  | -2.44491 | 0.010711783 |
| AT4G13770  | -2.41262 | 0.009408188 |
| AT5TE61030 | -2.41163 | 0.017079402 |
| AT3G25810  | -2.39813 | 4.21E-06    |
| AT2G12170  | -2.39452 | 1.50E-05    |
| AT1G66050  | -2.39268 | 0.014982796 |
| AT4G12030  | -2.37534 | 0.026998702 |
| AT4G12530  | -2.37507 | 0.025378829 |
| AT3G26520  | -2.36931 | 2.47E-07    |
| AT4G15100  | -2.31537 | 0.004727503 |
| AT4G05310  | -2.29842 | 0.012033218 |
| AT4G03935  | -2.29201 | 1.53E-05    |
| AT4G13190  | -2.25651 | 0.000624018 |
| AT1G48953  | -2.22068 | 0.030898544 |
| AT5G38010  | -2.19009 | 0.019443758 |
| AT3G50310  | -2.12287 | 0.002874776 |
| AT1G62770  | -2.08873 | 5.92E-06    |
| AT5G57220  | -2.06355 | 0.026170613 |
| AT3G55870  | -2.05123 | 0.002060077 |
| AT3G47580  | -2.02938 | 0.000471553 |
| AT3G54600  | -2.02059 | 6.77E-08    |
| AT4G15210  | -1.96151 | 9.89E-06    |
| AT2G25150  | -1.95235 | 0.00779145  |
| AT2TE84980 | -1.94307 | 0.018197134 |
| AT1G47760  | -1.93976 | 0.024825369 |
| AT5G24770  | -1.92079 | 5.85E-06    |
| AT4G15765  | -1.90391 | 0.03461352  |
| AT2G23590  | -1.86514 | 0.009333388 |
| AT4G15200  | -1.8635  | 0.003502803 |
| AT4TE42950 | -1.84916 | 0.000430328 |
| AT2G42170  | -1.83738 | 6.43E-05    |
| AT5G28442  | -1.82716 | 0.003803391 |
| AT1G66540  | -1.82629 | 0.010801903 |
| AT3G54450  | -1.80282 | 0.025479105 |
| AT5G13370  | -1.79908 | 0.001358826 |
| AT3G52535  | -1.77333 | 0.003491731 |
| AT1G26310  | -1.71751 | 1.33E-05    |
| AT3G44250  | -1.68256 | 0.004660645 |
| AT4G13495  | -1.67502 | 0.020845146 |
| AT1G57620  | -1.67427 | 5.17E-06    |
| AT2G04110  | -1.67239 | 5.82E-05    |
| AT3G32940  | -1.66379 | 3.89E-06    |
| AT3G42725  | -1.63576 | 0.002818301 |

|           |          |             |
|-----------|----------|-------------|
| AT1G68600 | -1.61758 | 1.18E-05    |
| AT4G03823 | -1.59795 | 0.021905738 |
| AT5G42280 | -1.57952 | 2.68E-05    |
| AT2G29370 | -1.57947 | 0.028368    |
| AT5G24780 | -1.57218 | 0.006566602 |
| AT1G18140 | -1.55066 | 3.81E-05    |
| AT4G01060 | -1.54384 | 0.002994488 |
| AT1G58370 | -1.52069 | 0.000228908 |
| AT3G30180 | -1.52038 | 7.77E-05    |
| AT3G16320 | -1.51093 | 0.001630034 |
| AT5G26210 | -1.51011 | 6.27E-05    |
| AT4G13410 | -1.49912 | 0.014008735 |
| AT1G52040 | -1.48992 | 0.004673476 |
| AT2G22960 | -1.46012 | 0.001016855 |
| AT2G39850 | -1.45691 | 0.000253625 |
| AT5G17165 | -1.4529  | 0.005539693 |
| AT1G57750 | -1.44736 | 0.015394648 |
| AT4G27570 | -1.43799 | 0.000459645 |
| AT1G35310 | -1.433   | 0.030650575 |
| AT3G15950 | -1.42189 | 0.036521507 |
| AT5G27490 | -1.4088  | 0.000493052 |
| AT2G37770 | -1.38662 | 0.029994482 |
| AT3G23480 | -1.38412 | 0.008215341 |
| AT1G53060 | -1.32909 | 0.040916646 |
| AT2G32290 | -1.32482 | 0.018429579 |
| AT4G17260 | -1.31549 | 0.000525215 |
| AT5G43403 | -1.31461 | 0.007964504 |
| AT3G47675 | -1.29937 | 0.018560505 |
| AT5G23970 | -1.25782 | 0.002257881 |
| AT2G14520 | -1.25278 | 0.005013292 |
| AT1G38131 | -1.24881 | 0.006541673 |
| AT2G15620 | -1.23807 | 0.002733952 |
| AT2G15400 | -1.20671 | 0.017002857 |
| AT2G41470 | -1.19665 | 0.012886715 |
| AT5G35450 | -1.19011 | 0.028155612 |
| AT5G27600 | -1.18743 | 0.004221764 |
| AT3G24360 | -1.18369 | 0.005030315 |
| AT1G03550 | -1.14567 | 0.011520748 |
| AT5G01180 | -1.1434  | 0.030102272 |
| AT1G64390 | -1.12936 | 0.027759079 |
| AT1G26945 | -1.11879 | 0.006833165 |
| AT1G34245 | -1.10505 | 0.036487752 |
| AT5G45680 | -1.0962  | 0.018429579 |
| AT5G50950 | -1.09553 | 0.043674151 |
| AT1G70560 | -1.09536 | 0.049958981 |
| AT5G25040 | -1.09308 | 0.042558458 |
| AT2G26860 | -1.09252 | 0.020456865 |
| AT1G17745 | -1.08408 | 0.005475102 |
| AT5G34940 | -1.08332 | 0.014853486 |

|            |          |             |
|------------|----------|-------------|
| AT2G40610  | -1.07488 | 0.011717058 |
| AT5G01170  | -1.06781 | 0.022553211 |
| AT4G11211  | -1.05391 | 0.013665278 |
| AT5G38120  | -1.03985 | 0.016394111 |
| AT4G12870  | -1.02935 | 0.04399442  |
| AT1G52030  | -1.02712 | 0.00788885  |
| AT3G07610  | -1.0217  | 0.027866581 |
| AT2G29340  | -1.01948 | 0.029967708 |
| AT1G23340  | -1.0097  | 0.046631847 |
| AT4G17270  | -0.99833 | 0.017932816 |
| AT4G13210  | -0.98835 | 0.034748188 |
| AT1G48490  | -0.98595 | 0.027710617 |
| AT5G24270  | -0.98295 | 0.04865339  |
| AT2G15050  | -0.9811  | 0.03854135  |
| AT4G18290  | -0.97467 | 0.034725673 |
| AT4G32460  | -0.95009 | 0.042691442 |
| AT1G78970  | -0.92373 | 0.037074697 |
| AT2G02710  | 0.83707  | 0.046817143 |
| AT4G24230  | 0.87183  | 0.049939713 |
| AT3G27870  | 0.94455  | 0.02264769  |
| AT1TE71775 | 0.95023  | 0.042004891 |
| AT1G72830  | 0.95915  | 0.044446521 |
| AT5G41610  | 0.96275  | 0.041424243 |
| AT4G35900  | 0.97904  | 0.029118858 |
| AT5G24800  | 0.9849   | 0.025034467 |
| AT5G43500  | 1.00677  | 0.017868395 |
| AT2G23320  | 1.00711  | 0.027759919 |
| AT4G36350  | 1.04408  | 0.028733611 |
| AT4G27450  | 1.05396  | 0.005325961 |
| AT3G10720  | 1.06967  | 0.005790791 |
| AT5G64260  | 1.07916  | 0.003652787 |
| AT3G59480  | 1.09921  | 0.019734518 |
| AT5G27890  | 1.15042  | 0.011520748 |
| AT1G32690  | 1.17867  | 0.046838148 |
| AT2G31880  | 1.18773  | 0.001620357 |
| AT3G50580  | 1.19267  | 0.005030315 |
| AT1G24220  | 1.21281  | 0.011738905 |
| AT4G27460  | 1.21524  | 0.015031191 |
| AT5G24530  | 1.21589  | 0.035410711 |
| AT2G18300  | 1.22021  | 0.025123045 |
| AT3G22880  | 1.2337   | 0.001581212 |
| AT4G23180  | 1.2379   | 0.003311328 |
| AT4G01250  | 1.23949  | 0.044430681 |
| AT5G51440  | 1.24876  | 0.031588732 |
| AT4G32480  | 1.259    | 0.014519967 |
| AT5G66400  | 1.26465  | 0.034513291 |
| AT4G01700  | 1.2816   | 0.022289467 |
| AT3G59060  | 1.28515  | 0.004765655 |
| AT3G20460  | 1.30005  | 0.003726751 |



|            |         |             |
|------------|---------|-------------|
| AT5G41200  | 1.31249 | 0.040323344 |
| AT4G25000  | 1.31506 | 0.009408188 |
| AT2G21850  | 1.32087 | 0.006526443 |
| AT3G59080  | 1.32091 | 0.030770144 |
| AT1G31740  | 1.32893 | 0.010915332 |
| AT2G42720  | 1.32947 | 0.018075309 |
| AT5G18270  | 1.3704  | 0.039593781 |
| AT1G35530  | 1.37496 | 0.000312284 |
| AT4G08850  | 1.38297 | 0.011738905 |
| AT5G60610  | 1.38641 | 0.004819789 |
| AT1G53020  | 1.40148 | 0.018167519 |
| AT3G18550  | 1.40194 | 0.049631142 |
| AT5TE18210 | 1.40935 | 0.047406451 |
| AT1G13400  | 1.41205 | 0.029317815 |
| AT1G56150  | 1.42055 | 0.012376653 |
| AT5G23350  | 1.42923 | 0.013880501 |
| AT1G36150  | 1.43039 | 0.005030315 |
| AT5G44570  | 1.43662 | 0.006349485 |
| AT1G45201  | 1.43763 | 0.013732895 |
| AT3G26760  | 1.44875 | 0.00837418  |
| AT2G44080  | 1.45305 | 0.009025705 |
| AT3G29670  | 1.45431 | 0.01745516  |
| AT4G33930  | 1.45442 | 0.042589344 |
| AT1G65342  | 1.46305 | 0.029190347 |
| AT4G14548  | 1.47166 | 0.00948775  |
| AT4G22690  | 1.47797 | 4.50E-05    |
| AT1G14580  | 1.48681 | 6.16E-05    |
| AT4G27590  | 1.48941 | 0.022160535 |
| AT2TE07550 | 1.49112 | 0.0087093   |
| AT2G42180  | 1.49267 | 0.01745516  |
| AT3G26742  | 1.50008 | 0.001934293 |
| AT3G05690  | 1.51655 | 0.020765472 |
| AT3G51440  | 1.52076 | 0.000288378 |
| AT5G42830  | 1.53632 | 0.012638054 |
| AT4G15760  | 1.54068 | 0.000320114 |
| AT1G33610  | 1.55751 | 0.002055931 |
| AT1G80820  | 1.56627 | 0.002089695 |
| AT5G34795  | 1.57239 | 0.001873838 |
| AT3G15356  | 1.57853 | 0.037663169 |
| AT5G08350  | 1.60544 | 0.024471963 |
| AT4G39830  | 1.6391  | 0.025039757 |
| AT3G17690  | 1.65106 | 0.003856874 |
| AT3G14020  | 1.65352 | 0.001596277 |
| AT2TE82000 | 1.6801  | 0.015860592 |
| AT1G53490  | 1.68527 | 6.91E-06    |
| AT2TE10620 | 1.69223 | 0.003730749 |
| AT5G24240  | 1.69484 | 0.004520393 |
| AT1G22890  | 1.69741 | 0.014617441 |
| AT4G19030  | 1.72546 | 0.012355273 |

|            |         |             |
|------------|---------|-------------|
| AT5TE39630 | 1.72624 | 0.000186985 |
| AT2G35300  | 1.73012 | 0.008024632 |
| AT1G14870  | 1.74827 | 0.000138292 |
| AT4G33050  | 1.76433 | 0.020227144 |
| AT5G23360  | 1.76714 | 1.84E-05    |
| AT5G44640  | 1.77829 | 0.024914923 |
| AT1G72060  | 1.79444 | 0.000452002 |
| AT1G52690  | 1.8288  | 4.01E-05    |
| AT1G14370  | 1.83573 | 0.011043278 |
| AT5G25470  | 1.84935 | 1.37E-05    |
| AT4TE04415 | 1.85179 | 1.10E-06    |
| AT4G00970  | 1.85968 | 0.042160996 |
| AT1TE78470 | 1.8779  | 0.000396921 |
| AT4G10920  | 1.88976 | 1.15E-07    |
| AT3TE91745 | 1.93935 | 0.000551728 |
| AT1G75040  | 1.96184 | 0.000132337 |
| AT1G56540  | 1.98233 | 0.001209473 |
| AT2G32210  | 1.98564 | 0.0355805   |
| AT3G61198  | 1.99335 | 0.009219955 |
| AT2G01960  | 2.00171 | 0.00287603  |
| AT4TE21090 | 2.01288 | 0.041881723 |
| AT3G26280  | 2.0211  | 0.000551706 |
| AT5G49250  | 2.02827 | 0.030579812 |
| AT2G34280  | 2.03018 | 0.027780778 |
| AT1TE42205 | 2.03584 | 0.002192491 |
| AT4G19080  | 2.0448  | 0.006378916 |
| AT4G36740  | 2.05172 | 0.046107054 |
| AT1G16910  | 2.06332 | 0.015519931 |
| AT4G23810  | 2.08296 | 0.042391143 |
| AT4G36500  | 2.08306 | 0.002439255 |
| AT3G59190  | 2.10453 | 2.03E-06    |
| AT4G00540  | 2.1117  | 0.006928126 |
| AT5G39770  | 2.13323 | 0.022023999 |
| AT3G43470  | 2.13979 | 0.009165882 |
| AT5G07760  | 2.15541 | 0.002308285 |
| AT4G12370  | 2.19276 | 0.001464629 |
| AT4G38540  | 2.19457 | 0.014334111 |
| AT3G26480  | 2.20634 | 2.35E-09    |
| AT5G19240  | 2.21669 | 0.039782637 |
| AT4G23230  | 2.23997 | 0.024907968 |
| AT4G18340  | 2.24512 | 4.61E-06    |
| AT4TE13150 | 2.24713 | 0.000948838 |
| AT5G66780  | 2.25083 | 0.026068811 |
| AT2TE34910 | 2.2734  | 0.016862267 |
| AT5TE49725 | 2.27352 | 5.77E-06    |
| AT3G26470  | 2.29522 | 0.000550404 |
| AT2TE37435 | 2.2972  | 0.004689643 |
| AT4TE08130 | 2.32545 | 0.012974812 |
| AT4G10910  | 2.32671 | 0.000343204 |

|            |         |             |
|------------|---------|-------------|
| AT1G15125  | 2.32867 | 0.005160681 |
| AT2G40960  | 2.32951 | 6.14E-05    |
| AT2G24600  | 2.34948 | 0.048415682 |
| AT2TE07145 | 2.34962 | 2.88E-09    |
| AT3TE57780 | 2.35598 | 2.31E-10    |
| AT1G76952  | 2.36794 | 0.000475835 |
| AT4G28040  | 2.39641 | 0.048412291 |
| AT4G23220  | 2.41661 | 1.85E-06    |
| AT2G15042  | 2.42085 | 4.86E-07    |
| AT4G18250  | 2.4257  | 4.50E-05    |
| AT5G41840  | 2.42866 | 0.0197346   |
| AT3G53980  | 2.44404 | 0.001139623 |
| AT3G25640  | 2.45021 | 0.021711177 |
| AT2G16050  | 2.46431 | 0.004916368 |
| AT2G34655  | 2.48732 | 1.66E-12    |
| AT5G44572  | 2.4918  | 0.001051736 |
| AT5G19230  | 2.50658 | 1.13E-05    |
| AT3G50480  | 2.52191 | 0.001882037 |
| AT5G25640  | 2.55758 | 0.017466011 |
| AT5G23220  | 2.56733 | 0.012800294 |
| AT5TE39170 | 2.57549 | 0.018902816 |
| AT2G46662  | 2.58183 | 0.003676925 |
| AT5TE56690 | 2.58283 | 0.003185155 |
| AT5G34780  | 2.59508 | 1.61E-09    |
| AT1TE58825 | 2.59787 | 0.001660222 |
| AT3TE76225 | 2.60016 | 6.14E-10    |
| AT1G67980  | 2.61861 | 0.001240395 |
| AT4G16540  | 2.62073 | 2.81E-07    |
| AT2G15790  | 2.6453  | 2.14E-14    |
| AT3G04210  | 2.64875 | 0.000680873 |
| AT1G66780  | 2.72024 | 0.001049753 |
| AT3TE48540 | 2.72196 | 0.000224517 |
| AT5TE86410 | 2.72408 | 8.02E-05    |
| AT1G19020  | 2.75199 | 0.005347531 |
| AT5TE40920 | 2.79594 | 0.011520748 |
| AT5TE23285 | 2.79759 | 0.007174349 |
| AT1G16130  | 2.80911 | 0.020145812 |
| AT2G18690  | 2.80921 | 9.78E-05    |
| AT2TE10590 | 2.81639 | 0.029510842 |
| AT3TE58875 | 2.83202 | 2.82E-07    |
| AT5G02330  | 2.84862 | 2.41E-10    |
| AT2G05995  | 2.85434 | 1.04E-07    |
| AT2G20142  | 2.85472 | 0.021546255 |
| AT4G28800  | 2.86289 | 0.002789886 |
| AT3G52400  | 2.86344 | 3.36E-07    |
| AT5G54710  | 2.89002 | 0.020970913 |
| AT1G21130  | 2.89999 | 6.39E-05    |
| AT3G26210  | 2.90136 | 0.042589344 |
| AT2G23680  | 2.90152 | 0.001711296 |

|            |         |             |
|------------|---------|-------------|
| AT1TE46385 | 2.9259  | 0.013018003 |
| AT4TE19470 | 2.92727 | 1.74E-07    |
| AT3TE57060 | 2.94393 | 0.048761193 |
| AT1TE34315 | 2.9583  | 0.007122617 |
| AT1G03810  | 2.97892 | 7.10E-07    |
| AT3TE51110 | 2.98886 | 0.004092643 |
| AT2TE10595 | 2.99396 | 1.40E-05    |
| AT1G78410  | 2.99604 | 0.018091251 |
| AT4G11000  | 3.01186 | 0.020579621 |
| AT2TE20835 | 3.03533 | 0.030795087 |
| AT1TE54805 | 3.03649 | 3.43E-08    |
| AT1TE22850 | 3.03789 | 3.27E-17    |
| AT3G29644  | 3.04136 | 2.67E-14    |
| AT4G26200  | 3.08513 | 0.027681467 |
| AT4TE06710 | 3.12813 | 2.51E-16    |
| AT1G35140  | 3.13461 | 0.032983565 |
| AT2TE78320 | 3.13997 | 6.54E-06    |
| AT3G29639  | 3.18225 | 7.64E-06    |
| AT1TE44230 | 3.21601 | 0.000327141 |
| AT5G38005  | 3.21609 | 1.33E-15    |
| AT2G04120  | 3.22041 | 2.91E-05    |
| AT1G36920  | 3.22284 | 5.11E-13    |
| AT2TE09500 | 3.22448 | 0.00016068  |
| AT4G03811  | 3.23954 | 2.71E-05    |
| AT4TE54750 | 3.2827  | 0.011025972 |
| AT4G04223  | 3.29124 | 1.84E-12    |
| AT5TE40945 | 3.30072 | 0.017755894 |
| AT3G30122  | 3.30256 | 1.79E-09    |
| AT2TE16335 | 3.30328 | 0.010111756 |
| AT4G22470  | 3.30602 | 0.005347531 |
| AT2G01280  | 3.33369 | 0.035822454 |
| AT4TE08240 | 3.33553 | 5.60E-05    |
| AT2TE25020 | 3.34421 | 6.24E-08    |
| AT5G52750  | 3.37398 | 0.004923995 |
| AT2G11851  | 3.37919 | 3.38E-12    |
| AT3TE48545 | 3.38976 | 3.94E-08    |
| AT5TE86350 | 3.40676 | 0.006112649 |
| AT3TE02240 | 3.41653 | 3.46E-20    |
| AT2G10440  | 3.42543 | 1.57E-09    |
| AT3G60920  | 3.43326 | 3.19E-11    |
| AT1G36922  | 3.44295 | 5.04E-12    |
| AT1TE53735 | 3.44387 | 0.00103186  |
| AT1TE36060 | 3.46194 | 0.00672591  |
| AT2G16310  | 3.46985 | 3.95E-11    |
| AT4G26350  | 3.48585 | 2.66E-08    |
| AT2G19893  | 3.5094  | 0.00012444  |
| AT4TE12760 | 3.52644 | 0.044021388 |
| AT1G68510  | 3.53407 | 0.001142899 |
| AT3TE64120 | 3.57225 | 0.000439322 |

|            |         |             |
|------------|---------|-------------|
| AT1G61920  | 3.58975 | 2.08E-08    |
| AT4TE20545 | 3.60501 | 0.005017012 |
| AT2G41640  | 3.60557 | 3.45E-12    |
| AT1G36020  | 3.60896 | 1.53E-09    |
| AT4G30280  | 3.61087 | 0.01425427  |
| AT2G41100  | 3.61777 | 0.000418054 |
| AT4TE21900 | 3.62337 | 0.00057857  |
| AT5TE39640 | 3.62811 | 0.001124453 |
| AT5TE44190 | 3.64252 | 0.002296053 |
| AT2TE13750 | 3.66266 | 5.26E-06    |
| AT3TE67950 | 3.67247 | 0.012770138 |
| AT3G04220  | 3.67307 | 0.016234273 |
| AT1TE51775 | 3.6764  | 6.90E-06    |
| AT1G36675  | 3.71908 | 3.17E-09    |
| AT1G24380  | 3.73275 | 0.002840899 |
| AT2G11522  | 3.74579 | 4.38E-07    |
| AT5G35338  | 3.75875 | 2.71E-07    |
| AT3TE21700 | 3.83041 | 2.12E-15    |
| AT4TE08780 | 3.85579 | 0.00045745  |
| AT1TE46835 | 3.86726 | 1.08E-14    |
| AT2TE44040 | 3.89676 | 0.015483274 |
| AT2TE26785 | 3.89946 | 0.029795127 |
| AT3TE51505 | 3.9094  | 0.001166627 |
| AT4G10695  | 3.91707 | 3.07E-06    |
| AT1TE55920 | 3.92463 | 2.52E-18    |
| AT3TE48535 | 3.95359 | 0.000111088 |
| AT2TE18840 | 3.97085 | 0.000292178 |
| AT5G35870  | 3.97882 | 0.00372143  |
| AT1G54420  | 3.98193 | 1.66E-11    |
| AT1TE22855 | 3.98369 | 4.23E-05    |
| AT5TE47750 | 3.9871  | 4.02E-19    |
| AT2TE29460 | 3.99592 | 0.032145607 |
| AT5G35490  | 4.00082 | 7.37E-11    |
| AT3G44070  | 4.00718 | 8.15E-28    |
| AT4TE17360 | 4.01307 | 1.68E-07    |
| AT5TE29680 | 4.02184 | 0.003158177 |
| AT5TE50380 | 4.07218 | 1.52E-23    |
| AT2G03821  | 4.07951 | 0.038540411 |
| AT5G05340  | 4.12471 | 0.000499148 |
| AT1TE17300 | 4.15512 | 0.007250709 |
| AT3TE53320 | 4.17963 | 0.005085391 |
| AT2TE00115 | 4.20244 | 4.30E-08    |
| AT1G28370  | 4.20849 | 0.002443394 |
| AT5G28660  | 4.22149 | 0.001062719 |
| AT3G48650  | 4.23909 | 0.014267591 |
| AT1TE35870 | 4.24573 | 0.00093097  |
| AT3TE18040 | 4.2584  | 1.93E-16    |
| AT2TE27540 | 4.2738  | 0.00459089  |
| AT5TE61735 | 4.27939 | 6.25E-14    |

|            |         |             |
|------------|---------|-------------|
| AT3TE47740 | 4.33469 | 1.19E-10    |
| AT3G32377  | 4.33866 | 6.11E-20    |
| AT3TE52975 | 4.34677 | 2.21E-08    |
| AT1TE83175 | 4.34765 | 0.012378697 |
| AT2TE18965 | 4.35882 | 3.82E-13    |
| AT1G60110  | 4.36099 | 1.00E-05    |
| AT5G43066  | 4.39115 | 0.009078392 |
| AT2TE41175 | 4.40909 | 4.79E-17    |
| AT2TE18000 | 4.41734 | 0.01958481  |
| AT2G34290  | 4.42085 | 0.007909472 |
| AT1TE41035 | 4.42291 | 0.000102789 |
| AT2TE20915 | 4.42431 | 8.81E-07    |
| AT2TE20035 | 4.42461 | 0.000989128 |
| AT3G33528  | 4.43103 | 1.33E-20    |
| AT1TE46970 | 4.43119 | 0.001064976 |
| AT5TE46840 | 4.43244 | 1.15E-07    |
| AT4G26730  | 4.43993 | 8.96E-05    |
| AT1TE86360 | 4.44905 | 1.03E-11    |
| AT4G17914  | 4.45197 | 5.04E-12    |
| AT2G14405  | 4.45298 | 0.001892026 |
| AT3TE65525 | 4.49029 | 2.83E-05    |
| AT5TE53035 | 4.51959 | 2.09E-06    |
| AT2TE11900 | 4.5267  | 0.029023391 |
| AT1G65500  | 4.55843 | 0.000666959 |
| AT1TE46220 | 4.56424 | 1.05E-07    |
| AT1G77960  | 4.57044 | 1.69E-09    |
| AT1TE42370 | 4.60827 | 0.041597801 |
| AT2TE11860 | 4.62897 | 4.92E-06    |
| AT3G60176  | 4.63818 | 2.72E-19    |
| AT3TE63400 | 4.68262 | 3.68E-09    |
| AT2G18880  | 4.69467 | 3.33E-15    |
| AT3TE49700 | 4.71155 | 0.001746063 |
| AT4G28870  | 4.73927 | 3.27E-07    |
| AT1TE51105 | 4.73944 | 0.000561856 |
| AT3TE52695 | 4.74531 | 0.001767304 |
| AT3G60950  | 4.76789 | 1.48E-05    |
| AT2TE09650 | 4.77225 | 0.002536774 |
| AT3TE63405 | 4.78063 | 2.71E-10    |
| AT3G48130  | 4.79    | 0.000361654 |
| AT5G38030  | 4.80439 | 1.11E-10    |
| AT2TE21220 | 4.82184 | 1.96E-16    |
| AT4TE20075 | 4.8223  | 1.61E-10    |
| AT4TE08355 | 4.83225 | 0.02469141  |
| AT2TE41170 | 4.83349 | 8.44E-18    |
| AT1TE54100 | 4.83532 | 7.88E-25    |
| AT2G13760  | 4.85023 | 0.021204246 |
| AT3TE47360 | 4.86458 | 4.02E-24    |
| AT4G08260  | 4.87522 | 6.86E-22    |
| AT3TE59500 | 4.88202 | 0.008852727 |

|            |         |             |
|------------|---------|-------------|
| AT2TE12425 | 4.88326 | 0.004773103 |
| AT2G16018  | 4.90305 | 2.05E-26    |
| AT5TE36535 | 4.91701 | 0.043818768 |
| AT2G15120  | 4.92351 | 0.021687129 |
| AT3G28923  | 4.92402 | 3.40E-13    |
| AT1G49680  | 4.93449 | 0.000212084 |
| AT2TE08225 | 4.95398 | 4.52E-26    |
| AT3G45910  | 4.96101 | 6.94E-06    |
| AT1G37000  | 4.97353 | 5.55E-15    |
| AT2TE23425 | 4.9907  | 3.20E-13    |
| AT2TE27505 | 4.99962 | 2.42E-15    |
| AT3TE37570 | 5.01647 | 1.78E-11    |
| AT2TE20920 | 5.01756 | 6.58E-06    |
| AT1G66790  | 5.02297 | 1.38E-07    |
| AT2G35670  | 5.0466  | 3.30E-25    |
| AT4TE18360 | 5.067   | 0.000893301 |
| AT2G32490  | 5.07078 | 0.043972681 |
| AT2G11405  | 5.07358 | 3.53E-05    |
| AT2TE10570 | 5.10733 | 1.76E-23    |
| AT4TE36845 | 5.10894 | 1.43E-12    |
| AT3TE58050 | 5.10922 | 0.018307601 |
| AT2G01422  | 5.11631 | 1.05E-09    |
| AT5TE47755 | 5.13235 | 5.73E-21    |
| AT4G03156  | 5.13712 | 0.000192675 |
| AT2TE27670 | 5.14272 | 1.83E-06    |
| AT1TE45510 | 5.15017 | 3.20E-11    |
| AT5TE38900 | 5.15118 | 2.67E-05    |
| AT3TE46565 | 5.15159 | 0.005654727 |
| AT2G16960  | 5.15506 | 1.16E-11    |
| AT5TE48825 | 5.15575 | 0.016458342 |
| AT5TE46860 | 5.17449 | 5.95E-11    |
| AT2G16340  | 5.17744 | 0.017851646 |
| AT2TE01560 | 5.20128 | 5.43E-18    |
| AT2TE28955 | 5.21346 | 4.47E-14    |
| AT2G13547  | 5.21829 | 7.30E-21    |
| AT3TE60310 | 5.23492 | 3.81E-39    |
| AT1G50350  | 5.24268 | 3.97E-17    |
| AT2TE22315 | 5.25832 | 0.004167212 |
| AT3TE45385 | 5.27324 | 0.017735348 |
| AT2G14840  | 5.30289 | 1.68E-07    |
| AT3TE54330 | 5.30603 | 4.70E-09    |
| AT4TE32185 | 5.30685 | 2.41E-09    |
| AT2TE37330 | 5.32067 | 7.28E-06    |
| AT5TE65370 | 5.33272 | 4.20E-27    |
| AT3TE51095 | 5.33411 | 0.048783149 |
| AT5TE25460 | 5.34065 | 2.51E-05    |
| AT1G26558  | 5.34724 | 2.32E-28    |
| AT3G25190  | 5.34853 | 0.013256039 |
| AT4TE21055 | 5.39702 | 3.98E-44    |

|            |         |             |
|------------|---------|-------------|
| AT3TE63180 | 5.4024  | 0.001545214 |
| AT5TE40110 | 5.42697 | 0.000970147 |
| AT4TE21910 | 5.45263 | 1.28E-06    |
| AT3TE92345 | 5.45933 | 0.001323207 |
| AT3TE50685 | 5.46029 | 0.004103843 |
| AT5TE39195 | 5.48919 | 0.00141235  |
| AT3TE44955 | 5.49575 | 1.90E-16    |
| AT5TE46150 | 5.49872 | 0.000657706 |
| AT1TE47605 | 5.51213 | 1.12E-16    |
| AT3G43833  | 5.55081 | 2.07E-42    |
| AT5G20440  | 5.56316 | 0.000107314 |
| AT3TE48070 | 5.57931 | 3.21E-21    |
| AT1TE51850 | 5.58594 | 0.000224696 |
| AT1G47595  | 5.59106 | 1.12E-08    |
| AT1TE52925 | 5.60252 | 1.63E-13    |
| AT1TE51945 | 5.60954 | 2.22E-14    |
| AT2TE17695 | 5.61352 | 9.66E-06    |
| AT4TE17500 | 5.61723 | 4.06E-13    |
| AT4TE22570 | 5.61746 | 0.00123786  |
| AT1TE70805 | 5.62121 | 1.38E-05    |
| AT1TE74860 | 5.62471 | 1.98E-24    |
| AT5TE39955 | 5.63181 | 0.001967226 |
| AT2TE20030 | 5.63191 | 1.35E-14    |
| AT2TE11985 | 5.65263 | 1.11E-12    |
| AT3TE57315 | 5.69598 | 1.33E-09    |
| AT1G62580  | 5.70671 | 2.94E-09    |
| AT3TE60160 | 5.711   | 2.53E-17    |
| AT2TE28280 | 5.72465 | 1.90E-19    |
| AT1TE52620 | 5.74076 | 0.000976788 |
| AT2TE28020 | 5.75452 | 1.04E-38    |
| AT1G53480  | 5.77483 | 1.38E-40    |
| AT2G07640  | 5.77998 | 9.31E-14    |
| AT5G35760  | 5.78614 | 8.53E-34    |
| AT4TE19675 | 5.78862 | 5.88E-08    |
| AT4TE15670 | 5.8094  | 2.13E-42    |
| AT4TE29830 | 5.8248  | 3.30E-14    |
| AT4TE09310 | 5.83231 | 1.14E-07    |
| AT2TE28555 | 5.84259 | 4.87E-33    |
| AT3G30720  | 5.84589 | 5.98E-33    |
| AT5TE47400 | 5.87594 | 2.69E-06    |
| AT2TE11410 | 5.87734 | 1.01E-11    |
| AT4TE13315 | 5.89055 | 4.22E-05    |
| AT2TE24245 | 5.90055 | 1.64E-08    |
| AT5TE38020 | 5.93358 | 1.73E-27    |
| AT2TE10575 | 5.93382 | 2.34E-24    |
| AT1G34440  | 5.9453  | 4.20E-05    |
| AT3TE63935 | 5.96223 | 1.04E-48    |
| AT2G13410  | 5.96915 | 1.76E-15    |
| AT2TE13760 | 5.9749  | 2.87E-05    |



|            |         |             |
|------------|---------|-------------|
| AT3TE57785 | 5.97915 | 8.41E-22    |
| AT1TE51555 | 5.97949 | 3.24E-05    |
| AT3TE47555 | 5.97987 | 9.82E-37    |
| AT2TE22345 | 5.99204 | 2.85E-09    |
| AT3TE52705 | 5.99357 | 0.009244798 |
| AT5G32569  | 6.00262 | 1.43E-06    |
| AT2TE54360 | 6.00422 | 3.95E-05    |
| AT5TE55145 | 6.02256 | 8.25E-05    |
| AT5TE43910 | 6.02601 | 4.42E-19    |
| AT2TE10385 | 6.03614 | 8.92E-14    |
| AT3TE51270 | 6.05402 | 0.000130586 |
| AT4G06748  | 6.0775  | 2.33E-44    |
| AT1G27990  | 6.08432 | 6.14E-06    |
| AT5G15690  | 6.09195 | 2.92E-33    |
| AT3TE61645 | 6.11    | 2.98E-05    |
| AT5TE46175 | 6.11613 | 7.95E-11    |
| AT1G18230  | 6.12546 | 9.85E-07    |
| AT5TE46485 | 6.13269 | 7.40E-28    |
| AT3TE53860 | 6.13673 | 2.25E-14    |
| AT1TE51155 | 6.15411 | 3.53E-13    |
| AT2G05050  | 6.16099 | 7.88E-18    |
| AT3TE90530 | 6.18118 | 4.40E-20    |
| AT2TE15415 | 6.18924 | 4.76E-07    |
| AT3G30770  | 6.19553 | 2.32E-31    |
| AT3TE45980 | 6.20316 | 1.04E-06    |
| AT5TE20395 | 6.20731 | 6.04E-09    |
| AT1TE46325 | 6.218   | 6.38E-08    |
| AT5TE43855 | 6.23097 | 2.48E-14    |
| AT5TE50155 | 6.24521 | 1.36E-15    |
| AT3TE45330 | 6.24838 | 4.68E-11    |
| AT5TE34980 | 6.25804 | 3.89E-46    |
| AT5TE37060 | 6.28234 | 2.19E-18    |
| AT3TE67325 | 6.30827 | 5.45E-35    |
| AT2G05752  | 6.31737 | 3.26E-06    |
| AT3G28899  | 6.33226 | 6.56E-13    |
| AT2TE09720 | 6.36849 | 8.88E-07    |
| AT5TE37660 | 6.37789 | 5.91E-11    |
| AT2TE23965 | 6.38921 | 1.58E-18    |
| AT5TE58750 | 6.40063 | 3.58E-07    |
| AT3G27473  | 6.40135 | 1.11E-40    |
| AT3TE66175 | 6.42942 | 6.75E-07    |
| AT3G32200  | 6.43399 | 6.69E-08    |
| AT2TE19175 | 6.4349  | 8.78E-07    |
| AT2TE26370 | 6.43668 | 3.66E-09    |
| AT5G28230  | 6.4702  | 3.56E-34    |
| AT2TE21605 | 6.47293 | 1.61E-09    |
| AT5TE41415 | 6.48539 | 8.00E-32    |
| AT5TE48930 | 6.48985 | 4.45E-14    |
| AT3TE57715 | 6.49291 | 3.32E-07    |

|            |         |             |
|------------|---------|-------------|
| AT1TE45965 | 6.49505 | 1.32E-15    |
| AT5TE43070 | 6.51089 | 4.50E-26    |
| AT2TE18240 | 6.52249 | 2.50E-30    |
| AT3TE59660 | 6.54147 | 1.29E-50    |
| AT2TE15900 | 6.54882 | 4.28E-17    |
| AT5TE38285 | 6.55108 | 3.30E-45    |
| AT3TE67635 | 6.5568  | 1.00E-30    |
| AT3TE83700 | 6.55757 | 1.79E-15    |
| AT5TE39590 | 6.56247 | 1.79E-18    |
| AT1TE52855 | 6.57126 | 3.83E-13    |
| AT4TE09845 | 6.57923 | 5.57E-29    |
| AT5TE47205 | 6.5866  | 5.28E-26    |
| AT3TE61075 | 6.59584 | 1.61E-43    |
| AT2G15555  | 6.59922 | 7.29E-19    |
| AT1TE52000 | 6.60379 | 1.03E-11    |
| AT5G41830  | 6.63108 | 1.50E-24    |
| AT4TE16945 | 6.63164 | 8.27E-18    |
| AT2TE16805 | 6.648   | 1.38E-38    |
| AT5TE42710 | 6.65435 | 6.45E-43    |
| AT4G08093  | 6.66014 | 1.66E-38    |
| AT1TE46065 | 6.66455 | 5.32E-12    |
| AT3TE42960 | 6.66538 | 1.39E-08    |
| AT3TE45430 | 6.67498 | 9.71E-41    |
| AT3G26800  | 6.68224 | 1.59E-05    |
| AT4TE24910 | 6.70887 | 7.64E-17    |
| AT4TE20535 | 6.71984 | 2.64E-10    |
| AT4TE28010 | 6.74204 | 5.01E-08    |
| AT1TE52860 | 6.74503 | 4.52E-13    |
| AT2G05914  | 6.77699 | 2.90E-63    |
| AT4TE16900 | 6.80263 | 4.76E-07    |
| AT1TE54655 | 6.80919 | 5.99E-36    |
| AT5TE39245 | 6.81105 | 9.31E-15    |
| AT4TE15565 | 6.81259 | 2.20E-09    |
| AT3TE59025 | 6.81802 | 5.51E-12    |
| AT3TE53690 | 6.83001 | 1.68E-13    |
| AT5TE37985 | 6.84526 | 0.000576298 |
| AT2TE25540 | 6.84559 | 1.12E-07    |
| AT5TE49335 | 6.86014 | 6.16E-23    |
| AT5G29030  | 6.8661  | 7.71E-24    |
| AT2TE15655 | 6.86674 | 1.01E-22    |
| AT4TE08245 | 6.88831 | 5.85E-14    |
| AT5TE38340 | 6.90457 | 1.30E-35    |
| AT1TE51835 | 6.91308 | 4.53E-14    |
| AT1G66100  | 6.91968 | 0.001620701 |
| AT5TE47105 | 6.92426 | 2.40E-15    |
| AT3TE64215 | 6.95202 | 1.80E-18    |
| AT5TE45005 | 6.9589  | 4.06E-25    |
| AT1TE49325 | 6.96377 | 3.18E-11    |
| AT5TE41775 | 6.9695  | 9.11E-13    |

|            |         |             |
|------------|---------|-------------|
| AT4TE18785 | 6.97855 | 1.81E-09    |
| AT1G18130  | 6.99233 | 1.73E-07    |
| AT1TE46635 | 7.00057 | 1.69E-08    |
| AT4G07526  | 7.01012 | 1.67E-24    |
| AT4TE19030 | 7.01267 | 6.89E-10    |
| AT2TE12115 | 7.01279 | 4.51E-17    |
| AT2TE05675 | 7.03484 | 9.26E-23    |
| AT3TE54450 | 7.03967 | 3.35E-10    |
| AT2TE28290 | 7.05362 | 6.11E-11    |
| AT2TE22170 | 7.05925 | 2.77E-09    |
| AT2TE18415 | 7.08878 | 1.61E-08    |
| AT2TE06620 | 7.09303 | 8.05E-37    |
| AT4TE18765 | 7.09606 | 3.24E-06    |
| AT2TE22180 | 7.11942 | 2.59E-10    |
| AT1TE28830 | 7.1584  | 1.27E-55    |
| AT1TE58100 | 7.17257 | 1.83E-09    |
| AT2TE06955 | 7.18355 | 4.24E-33    |
| AT3TE55360 | 7.18948 | 4.86E-20    |
| AT1TE44720 | 7.19965 | 7.38E-11    |
| AT3TE57085 | 7.22024 | 5.34E-19    |
| AT1G36078  | 7.2294  | 2.16E-11    |
| AT5TE43580 | 7.24814 | 8.32E-40    |
| AT2TE19200 | 7.24874 | 3.71E-50    |
| AT2TE16955 | 7.27313 | 2.95E-25    |
| AT5TE40100 | 7.2788  | 4.19E-13    |
| AT5TE56585 | 7.27884 | 6.70E-08    |
| AT5TE39140 | 7.28032 | 4.47E-62    |
| AT5G28235  | 7.28561 | 6.31E-33    |
| AT5TE44235 | 7.28784 | 1.57E-50    |
| AT2TE16270 | 7.32684 | 1.02E-12    |
| AT4TE13880 | 7.32894 | 5.19E-22    |
| AT2G06095  | 7.33957 | 2.75E-13    |
| AT4TE13450 | 7.38888 | 1.33E-13    |
| AT5TE22990 | 7.41838 | 6.84E-16    |
| AT5TE47215 | 7.42244 | 0.002439255 |
| AT5TE45900 | 7.43182 | 4.08E-13    |
| AT5TE23185 | 7.43789 | 7.22E-63    |
| AT2G19850  | 7.44098 | 6.33E-44    |
| AT4TE06990 | 7.47627 | 5.04E-19    |
| AT5TE55555 | 7.48621 | 5.56E-58    |
| AT2TE12140 | 7.49931 | 7.56E-14    |
| AT2G33175  | 7.5063  | 9.53E-41    |
| AT5TE41980 | 7.50769 | 1.46E-44    |
| AT3TE68090 | 7.52798 | 8.45E-22    |
| AT3TE59490 | 7.52884 | 2.12E-06    |
| AT2TE37050 | 7.57032 | 4.60E-38    |
| AT5TE44185 | 7.57901 | 4.10E-14    |
| AT5G45570  | 7.58037 | 1.67E-62    |
| AT3TE49825 | 7.58135 | 1.01E-33    |

|            |         |             |
|------------|---------|-------------|
| AT2TE10980 | 7.58487 | 1.63E-50    |
| AT2TE15660 | 7.59255 | 4.22E-16    |
| AT2TE28325 | 7.59307 | 5.33E-49    |
| AT1TE43740 | 7.6076  | 3.44E-14    |
| AT3TE57310 | 7.61275 | 4.38E-49    |
| AT3TE53865 | 7.61314 | 1.23E-52    |
| AT5TE47100 | 7.61497 | 5.11E-28    |
| AT5TE64600 | 7.61743 | 2.34E-45    |
| AT3G27140  | 7.62504 | 1.57E-15    |
| AT1TE52990 | 7.63503 | 2.48E-45    |
| AT2TE12145 | 7.63848 | 1.30E-14    |
| AT5TE44415 | 7.64216 | 2.01E-19    |
| AT3G30370  | 7.64889 | 8.25E-15    |
| AT5TE38320 | 7.65287 | 2.75E-41    |
| AT5TE44310 | 7.65689 | 3.52E-16    |
| AT5G28180  | 7.70395 | 3.98E-19    |
| AT2TE23185 | 7.7107  | 3.24E-34    |
| AT3G07380  | 7.73552 | 7.78E-25    |
| AT5TE52400 | 7.74025 | 2.08E-18    |
| AT3TE52540 | 7.74875 | 3.70E-16    |
| AT2TE23855 | 7.75191 | 1.97E-11    |
| AT4TE18315 | 7.80341 | 1.84E-34    |
| AT4G07320  | 7.80465 | 3.14E-23    |
| AT3TE59340 | 7.81218 | 4.33E-13    |
| AT4TE67560 | 7.84042 | 4.79E-56    |
| AT5TE41835 | 7.85969 | 1.38E-07    |
| AT2G06002  | 7.8692  | 1.61E-55    |
| AT3TE20780 | 7.8717  | 2.82E-42    |
| AT1G67105  | 7.89444 | 1.35E-72    |
| AT5TE42925 | 7.90885 | 8.69E-34    |
| AT5TE42255 | 7.91552 | 5.87E-15    |
| AT4G19240  | 7.91926 | 2.16E-54    |
| AT4G08430  | 7.94344 | 2.67E-48    |
| AT4TE08995 | 7.9545  | 5.06E-48    |
| AT1TE53060 | 7.95585 | 5.76E-58    |
| AT1G46696  | 7.96463 | 4.27E-40    |
| AT5TE44890 | 7.96659 | 0.031613563 |
| AT1TE42445 | 7.98888 | 5.92E-38    |
| AT2TE20140 | 7.99326 | 1.37E-32    |
| AT5TE43325 | 8.00916 | 2.59E-26    |
| AT2TE08135 | 8.01193 | 5.50E-64    |
| AT3G54730  | 8.01575 | 7.76E-32    |
| AT2TE16580 | 8.01719 | 9.93E-18    |
| AT5TE32885 | 8.02989 | 4.65E-09    |
| AT2TE19485 | 8.05162 | 2.96E-18    |
| AT5TE49755 | 8.05964 | 1.61E-40    |
| AT2TE58010 | 8.07613 | 5.98E-19    |
| AT1TE43040 | 8.09894 | 2.37E-15    |
| AT5TE47170 | 8.10851 | 2.03E-25    |

|            |         |          |
|------------|---------|----------|
| AT4TE10675 | 8.13013 | 1.54E-39 |
| AT3TE53745 | 8.13704 | 5.42E-37 |
| AT5TE33315 | 8.14022 | 1.36E-30 |
| AT1TE55795 | 8.14937 | 1.82E-24 |
| AT2TE18330 | 8.15276 | 1.79E-20 |
| AT3TE54575 | 8.15908 | 9.72E-41 |
| AT1TE36570 | 8.16085 | 6.23E-38 |
| AT2TE10975 | 8.16899 | 5.31E-43 |
| AT2TE16865 | 8.17372 | 2.09E-24 |
| AT4TE18650 | 8.17377 | 8.60E-17 |
| AT2TE11890 | 8.17989 | 9.86E-51 |
| AT2TE35840 | 8.18545 | 8.13E-13 |
| AT2TE11805 | 8.1878  | 1.05E-41 |
| AT1G27565  | 8.19067 | 2.94E-41 |
| AT4G15242  | 8.19261 | 9.28E-49 |
| AT5TE46155 | 8.20756 | 6.63E-71 |
| AT3TE50575 | 8.20903 | 8.34E-26 |
| AT2TE24735 | 8.21161 | 6.00E-54 |
| AT4TE18625 | 8.21673 | 4.08E-27 |
| AT1TE43880 | 8.2248  | 8.74E-48 |
| AT1TE42210 | 8.22504 | 1.08E-24 |
| AT5G28810  | 8.24633 | 9.88E-69 |
| AT4TE08850 | 8.25725 | 2.48E-09 |
| AT5TE46855 | 8.25977 | 2.05E-21 |
| AT3TE61065 | 8.26161 | 3.56E-49 |
| AT5TE47525 | 8.26561 | 7.06E-25 |
| AT2TE21105 | 8.26793 | 4.11E-20 |
| AT2TE22235 | 8.27633 | 1.28E-22 |
| AT5TE83215 | 8.28669 | 2.32E-11 |
| AT3TE53605 | 8.29081 | 2.28E-27 |
| AT5TE42470 | 8.29614 | 1.91E-80 |
| AT3G01345  | 8.30491 | 1.69E-83 |
| AT3G31910  | 8.31491 | 3.54E-39 |
| AT1TE39380 | 8.32057 | 1.39E-55 |
| AT3TE59045 | 8.32943 | 2.65E-25 |
| AT4G06597  | 8.33009 | 1.01E-25 |
| AT1TE27295 | 8.34373 | 4.57E-60 |
| AT5TE43815 | 8.34677 | 9.99E-67 |
| AT5TE42035 | 8.36449 | 1.57E-45 |
| AT2TE23670 | 8.39088 | 1.42E-21 |
| AT1TE45175 | 8.39472 | 1.44E-30 |
| AT4TE25065 | 8.39528 | 9.57E-24 |
| AT2TE16585 | 8.40178 | 9.50E-34 |
| AT3G14670  | 8.40847 | 9.07E-26 |
| AT3TE48135 | 8.42642 | 1.29E-70 |
| AT3TE53995 | 8.43218 | 9.21E-86 |
| AT1TE96425 | 8.43357 | 1.80E-29 |
| AT5TE18470 | 8.43392 | 6.42E-22 |
| AT2TE16530 | 8.44564 | 8.06E-59 |

|            |         |          |
|------------|---------|----------|
| AT5TE42435 | 8.47058 | 7.34E-18 |
| AT2TE20940 | 8.47647 | 4.56E-68 |
| AT2TE12020 | 8.48252 | 5.94E-53 |
| AT5TE39325 | 8.48641 | 2.19E-25 |
| AT5TE39425 | 8.49544 | 1.79E-76 |
| AT2G06420  | 8.50044 | 1.39E-22 |
| AT3TE55365 | 8.50505 | 5.96E-69 |
| AT2TE07745 | 8.51321 | 3.71E-09 |
| AT2TE06610 | 8.52248 | 1.75E-43 |
| AT5TE44130 | 8.53244 | 1.38E-40 |
| AT4TE15270 | 8.54302 | 1.64E-30 |
| AT5TE32355 | 8.54585 | 1.65E-24 |
| AT5TE46210 | 8.55124 | 1.96E-87 |
| AT3TE61290 | 8.55627 | 3.33E-30 |
| AT2TE16860 | 8.56012 | 7.40E-39 |
| AT1TE72615 | 8.5691  | 4.85E-49 |
| AT3TE45630 | 8.57653 | 1.31E-23 |
| AT4TE16745 | 8.60495 | 1.53E-23 |
| AT4G04250  | 8.60576 | 8.05E-58 |
| AT2TE11355 | 8.60817 | 4.16E-13 |
| AT5TE46110 | 8.61344 | 5.32E-24 |
| AT1TE46235 | 8.62211 | 4.49E-06 |
| AT3TE60195 | 8.63961 | 8.05E-33 |
| AT2TE21110 | 8.64023 | 3.62E-15 |
| AT1TE42875 | 8.64477 | 1.04E-53 |
| AT4TE46305 | 8.64727 | 8.00E-44 |
| AT1TE51040 | 8.65821 | 2.08E-31 |
| AT5TE39230 | 8.65918 | 1.72E-37 |
| AT2TE13060 | 8.67492 | 7.43E-15 |
| AT2TE16245 | 8.68056 | 4.73E-44 |
| AT2G07750  | 8.69131 | 9.59E-27 |
| AT5TE39315 | 8.70584 | 2.38E-19 |
| AT5G32590  | 8.71091 | 1.91E-46 |
| AT4TE22955 | 8.72706 | 5.14E-52 |
| AT2TE16575 | 8.73842 | 1.05E-37 |
| AT2TE22075 | 8.75108 | 3.62E-61 |
| AT5TE42330 | 8.75168 | 1.44E-21 |
| AT1TE47105 | 8.75609 | 1.48E-23 |
| AT5G29040  | 8.76803 | 1.89E-46 |
| AT4TE44080 | 8.77289 | 9.20E-55 |
| AT3TE51675 | 8.78044 | 2.07E-13 |
| AT1TE51820 | 8.7927  | 1.94E-58 |
| AT1TE52590 | 8.79759 | 7.43E-66 |
| AT1TE44455 | 8.79844 | 6.02E-39 |
| AT3TE53580 | 8.80886 | 3.56E-54 |
| AT5TE25535 | 8.81048 | 1.23E-25 |
| AT1TE49300 | 8.81342 | 5.02E-41 |
| AT3TE50500 | 8.81419 | 4.32E-31 |
| AT3G43340  | 8.82415 | 1.36E-35 |

|            |         |          |
|------------|---------|----------|
| AT2TE20925 | 8.82677 | 3.48E-39 |
| AT1TE52120 | 8.83231 | 2.16E-25 |
| AT3TE61600 | 8.83348 | 6.24E-48 |
| AT5G34869  | 8.83556 | 1.41E-76 |
| AT5TE41770 | 8.83706 | 1.41E-27 |
| AT4TE18055 | 8.83989 | 2.30E-33 |
| AT5TE40575 | 8.85619 | 5.13E-79 |
| AT1G63540  | 8.89887 | 1.05E-18 |
| AT1TE62470 | 8.90157 | 2.43E-86 |
| AT2TE20935 | 8.9019  | 1.96E-35 |
| AT3TE59885 | 8.91126 | 5.43E-35 |
| AT2TE17625 | 8.91367 | 3.37E-15 |
| AT2TE19595 | 8.92677 | 8.41E-65 |
| AT3TE61160 | 8.93149 | 2.39E-54 |
| AT2TE16235 | 8.94556 | 5.93E-74 |
| AT1TE52610 | 8.9466  | 1.50E-14 |
| AT3TE63215 | 8.95489 | 1.48E-14 |
| AT3TE58020 | 8.96114 | 3.31E-76 |
| AT4TE09080 | 8.9711  | 6.70E-33 |
| AT2G17690  | 8.992   | 1.98E-89 |
| AT2TE27465 | 8.99272 | 2.39E-35 |
| AT1TE48830 | 8.9939  | 5.81E-16 |
| AT3TE61555 | 9.00294 | 9.19E-23 |
| AT5TE41420 | 9.00812 | 2.38E-69 |
| AT5G26270  | 9.02039 | 3.97E-88 |
| AT4TE08475 | 9.02104 | 4.44E-32 |
| AT2TE19435 | 9.03634 | 1.07E-61 |
| AT3TE62735 | 9.04526 | 6.86E-54 |
| AT3TE57150 | 9.04747 | 1.57E-44 |
| AT4TE16500 | 9.05438 | 1.61E-30 |
| AT3TE53630 | 9.05567 | 3.34E-29 |
| AT3G43148  | 9.05658 | 1.58E-49 |
| AT3TE54710 | 9.06099 | 8.63E-32 |
| AT3TE22200 | 9.06987 | 7.18E-58 |
| AT4TE15440 | 9.07405 | 1.71E-72 |
| AT2TE16425 | 9.0778  | 1.17E-56 |
| AT4TE15280 | 9.09026 | 1.22E-39 |
| AT3TE62685 | 9.09047 | 3.08E-55 |
| AT5TE58755 | 9.09548 | 2.01E-30 |
| AT1TE46330 | 9.10945 | 5.36E-57 |
| AT4G06582  | 9.11382 | 1.35E-33 |
| AT4TE20400 | 9.11673 | 1.00E-53 |
| AT3TE60200 | 9.12093 | 1.56E-32 |
| AT2TE17725 | 9.13587 | 1.36E-66 |
| AT4TE18445 | 9.14456 | 5.48E-53 |
| AT5TE44365 | 9.16064 | 2.44E-30 |
| AT3TE50940 | 9.16436 | 9.20E-41 |
| AT5TE47500 | 9.17176 | 8.71E-35 |
| AT1G47265  | 9.17243 | 3.88E-27 |

|            |         |          |
|------------|---------|----------|
| AT2TE05755 | 9.17453 | 4.41E-41 |
| AT4TE19920 | 9.17561 | 2.27E-35 |
| AT4TE18435 | 9.17735 | 6.58E-83 |
| AT3TE63540 | 9.17987 | 1.90E-85 |
| AT2TE43165 | 9.18246 | 1.83E-30 |
| AT5TE18885 | 9.18365 | 7.00E-38 |
| AT3TE70635 | 9.18678 | 1.06E-66 |
| AT5G45095  | 9.18795 | 2.04E-85 |
| AT5TE43915 | 9.20064 | 3.35E-63 |
| AT2TE27645 | 9.20969 | 4.43E-50 |
| AT5TE44740 | 9.21753 | 1.51E-41 |
| AT3TE56700 | 9.21877 | 6.07E-12 |
| AT1TE54645 | 9.22011 | 5.85E-47 |
| AT3TE51660 | 9.22524 | 3.04E-57 |
| AT5TE42440 | 9.23296 | 2.07E-73 |
| AT1G35617  | 9.24539 | 1.74E-30 |
| AT5TE48205 | 9.24845 | 8.45E-34 |
| AT2TE16310 | 9.25124 | 2.17E-70 |
| AT4G25530  | 9.26434 | 9.73E-90 |
| AT3TE59450 | 9.26654 | 9.76E-61 |
| AT3TE61520 | 9.27473 | 7.87E-27 |
| AT3TE51460 | 9.27904 | 4.58E-95 |
| AT2TE15565 | 9.2831  | 2.06E-50 |
| AT3TE48150 | 9.28561 | 1.22E-56 |
| AT2TE20255 | 9.28877 | 1.96E-87 |
| AT2TE25365 | 9.30744 | 2.81E-33 |
| AT4TE15255 | 9.31081 | 1.05E-54 |
| AT3TE58895 | 9.3197  | 6.03E-77 |
| AT1TE65060 | 9.34526 | 6.83E-96 |
| AT2TE11545 | 9.34888 | 5.56E-42 |
| AT3TE67445 | 9.37342 | 4.03E-64 |
| AT2TE10260 | 9.37388 | 8.53E-40 |
| AT2TE23705 | 9.38422 | 1.98E-89 |
| AT1TE50875 | 9.38825 | 6.36E-43 |
| AT1TE19130 | 9.39316 | 6.95E-47 |
| AT4TE18470 | 9.39496 | 8.97E-35 |
| AT1TE49675 | 9.39697 | 8.78E-53 |
| AT5G37140  | 9.40419 | 7.36E-38 |
| AT2TE13350 | 9.40718 | 9.64E-64 |
| AT2G11010  | 9.41815 | 1.87E-24 |
| AT5TE48550 | 9.42638 | 4.15E-36 |
| AT1TE53390 | 9.42907 | 1.91E-69 |
| AT5TE42860 | 9.4328  | 1.15E-35 |
| AT4TE16400 | 9.43353 | 4.92E-84 |
| AT3TE57645 | 9.44819 | 9.43E-53 |
| AT4G03830  | 9.45661 | 2.68E-35 |
| AT4TE09995 | 9.48088 | 8.33E-36 |
| AT5TE43535 | 9.48582 | 9.99E-33 |
| AT2TE17110 | 9.48806 | 2.00E-94 |



|            |         |          |
|------------|---------|----------|
| AT5TE52855 | 9.49633 | 3.38E-43 |
| AT1TE64830 | 9.50507 | 2.60E-60 |
| AT5TE44730 | 9.51327 | 9.29E-69 |
| AT4TE09510 | 9.51936 | 8.08E-50 |
| AT1TE42225 | 9.53607 | 5.43E-18 |
| AT4TE17070 | 9.54596 | 2.79E-31 |
| AT5TE43435 | 9.55051 | 3.32E-19 |
| AT4TE09565 | 9.5515  | 5.72E-66 |
| AT4TE20815 | 9.55802 | 3.29E-30 |
| AT2TE28025 | 9.55845 | 1.27E-56 |
| AT2TE16415 | 9.56831 | 9.23E-30 |
| AT3TE51735 | 9.57945 | 1.75E-85 |
| AT4TE18680 | 9.57955 | 1.15E-33 |
| AT5TE42350 | 9.58983 | 3.24E-29 |
| AT2TE11925 | 9.5899  | 4.42E-48 |
| AT1TE52950 | 9.59116 | 6.04E-95 |
| AT5TE46685 | 9.59482 | 1.92E-35 |
| AT2TE18155 | 9.59521 | 1.81E-37 |
| AT3TE52320 | 9.59863 | 5.38E-57 |
| AT3TE50025 | 9.60024 | 1.14E-95 |
| AT1TE64825 | 9.6093  | 1.17E-54 |
| AT3TE48120 | 9.61372 | 7.85E-89 |
| AT5TE42420 | 9.62147 | 1.12E-96 |
| AT4G07965  | 9.62182 | 3.87E-53 |
| AT1TE44380 | 9.63648 | 3.57E-63 |
| AT5TE69650 | 9.66019 | 8.35E-44 |
| AT5TE47895 | 9.66364 | 1.61E-37 |
| AT3TE53970 | 9.66519 | 1.17E-26 |
| AT2TE21710 | 9.673   | 3.28E-84 |
| AT5TE43805 | 9.67665 | 1.25E-82 |
| AT5TE42965 | 9.68023 | 1.19E-60 |
| AT4TE16080 | 9.68057 | 1.71E-48 |
| AT5TE40295 | 9.69089 | 3.86E-58 |
| AT3TE62025 | 9.69701 | 3.36E-45 |
| AT4TE08990 | 9.69707 | 3.29E-42 |
| AT1TE52205 | 9.70168 | 2.19E-93 |
| AT2TE16590 | 9.70338 | 2.33E-18 |
| AT1TE54640 | 9.70375 | 3.83E-46 |
| AT1TE72970 | 9.70534 | 6.03E-60 |
| AT2TE09735 | 9.70818 | 2.07E-54 |
| AT1TE70815 | 9.7438  | 7.15E-84 |
| AT2TE26315 | 9.76599 | 1.21E-39 |
| AT5TE46220 | 9.76641 | 3.55E-37 |
| AT4TE25050 | 9.76685 | 4.19E-47 |
| AT5TE53465 | 9.77298 | 4.11E-53 |
| AT1TE82600 | 9.77677 | 1.08E-65 |
| AT4TE09085 | 9.78293 | 2.91E-85 |
| AT5G41660  | 9.78723 | 7.30E-66 |
| AT3TE51330 | 9.78795 | 1.71E-32 |

|            |          |           |
|------------|----------|-----------|
| AT3TE60280 | 9.79491  | 1.06E-102 |
| AT2TE23970 | 9.80085  | 4.18E-25  |
| AT4TE14295 | 9.80122  | 1.61E-57  |
| AT3TE69350 | 9.80609  | 3.25E-92  |
| AT5TE36940 | 9.84433  | 7.39E-92  |
| AT5TE44770 | 9.85079  | 5.75E-91  |
| AT1TE55320 | 9.85527  | 2.40E-100 |
| AT5TE42010 | 9.85533  | 1.23E-25  |
| AT4TE19915 | 9.85809  | 1.24E-80  |
| AT3TE52305 | 9.85987  | 4.84E-80  |
| AT5TE37965 | 9.86299  | 4.23E-97  |
| AT1TE44450 | 9.87383  | 2.08E-97  |
| AT5TE43360 | 9.8839   | 4.59E-31  |
| AT1TE51055 | 9.8877   | 5.02E-51  |
| AT4TE16990 | 9.88782  | 9.52E-19  |
| AT5TE46215 | 9.89477  | 2.04E-85  |
| AT1TE46765 | 9.8999   | 5.26E-62  |
| AT1TE48035 | 9.90026  | 1.98E-97  |
| AT3TE52310 | 9.90767  | 5.71E-47  |
| AT2TE22040 | 9.91007  | 9.79E-92  |
| AT5TE33455 | 9.92478  | 3.75E-65  |
| AT1TE44125 | 9.92884  | 1.64E-67  |
| AT4TE20245 | 9.93261  | 4.00E-80  |
| AT3TE51380 | 9.93385  | 5.88E-12  |
| AT4TE20745 | 9.94048  | 3.59E-42  |
| AT4TE18720 | 9.94381  | 4.48E-54  |
| AT3TE50670 | 9.94426  | 3.36E-71  |
| AT1TE54760 | 9.94735  | 5.74E-66  |
| AT2TE16230 | 9.94832  | 1.02E-47  |
| AT4TE15875 | 9.94851  | 1.09E-94  |
| AT4TE18685 | 9.95229  | 9.94E-22  |
| AT2TE11350 | 9.96078  | 4.00E-80  |
| AT1TE52210 | 9.96447  | 1.70E-50  |
| AT1TE47750 | 9.9649   | 1.91E-43  |
| AT1TE45020 | 9.96686  | 1.57E-92  |
| AT1TE49315 | 9.96733  | 5.80E-44  |
| AT3TE50760 | 9.96797  | 2.33E-46  |
| AT2TE24525 | 9.96824  | 2.95E-94  |
| AT5TE41870 | 9.96866  | 2.20E-90  |
| AT4TE14540 | 9.96982  | 2.23E-67  |
| AT5TE44355 | 9.97322  | 1.61E-60  |
| AT5TE43260 | 9.97699  | 6.79E-88  |
| AT3TE54005 | 9.9856   | 8.28E-96  |
| AT1G51172  | 9.98879  | 8.31E-48  |
| AT1TE52985 | 9.9973   | 2.02E-72  |
| AT3TE60460 | 10.00325 | 3.06E-84  |
| AT3TE57395 | 10.0082  | 4.20E-96  |
| AT5G38190  | 10.00938 | 1.33E-69  |
| AT5TE36945 | 10.01214 | 2.80E-78  |

|            |          |           |
|------------|----------|-----------|
| AT5TE47200 | 10.02192 | 1.08E-51  |
| AT3TE51340 | 10.03027 | 2.26E-11  |
| AT4TE15870 | 10.03685 | 8.42E-51  |
| AT1TE48020 | 10.04133 | 6.54E-39  |
| AT5TE54525 | 10.04417 | 1.20E-48  |
| AT4TE05190 | 10.04517 | 1.23E-95  |
| AT5TE43975 | 10.04843 | 7.76E-80  |
| AT2TE25740 | 10.05007 | 1.70E-68  |
| AT2TE18455 | 10.05554 | 2.17E-51  |
| AT5TE40565 | 10.06864 | 1.45E-81  |
| AT2G11773  | 10.08035 | 1.83E-32  |
| AT4TE21170 | 10.108   | 5.73E-75  |
| AT4TE15820 | 10.11331 | 2.19E-95  |
| AT2TE20220 | 10.11635 | 5.11E-91  |
| AT1G44040  | 10.13646 | 3.72E-21  |
| AT2TE16420 | 10.14622 | 2.35E-52  |
| AT3TE62785 | 10.1498  | 6.03E-78  |
| AT4TE19140 | 10.15991 | 7.07E-38  |
| AT2TE48990 | 10.16235 | 1.22E-65  |
| AT5G33251  | 10.16236 | 3.06E-81  |
| AT4TE21190 | 10.16238 | 5.46E-53  |
| AT1TE52125 | 10.16788 | 3.06E-51  |
| AT1G20400  | 10.16878 | 1.01E-77  |
| AT2TE05665 | 10.17768 | 1.88E-19  |
| AT4TE09580 | 10.18072 | 5.83E-15  |
| AT5TE55490 | 10.18521 | 1.76E-76  |
| AT3TE61525 | 10.18675 | 1.08E-94  |
| AT3TE64435 | 10.18811 | 3.03E-97  |
| AT3TE61615 | 10.19246 | 9.23E-45  |
| AT4TE13035 | 10.19288 | 1.92E-97  |
| AT5TE65540 | 10.19333 | 4.24E-94  |
| AT2TE63800 | 10.20078 | 1.21E-104 |
| AT1TE50860 | 10.21364 | 9.84E-100 |
| AT4G08593  | 10.21763 | 4.48E-77  |
| AT4TE19150 | 10.22051 | 9.56E-73  |
| AT3TE53045 | 10.22334 | 1.69E-60  |
| AT3TE50595 | 10.22603 | 1.96E-98  |
| AT1TE44630 | 10.22701 | 3.82E-57  |
| AT3G43310  | 10.23657 | 1.98E-46  |
| AT4TE20120 | 10.23691 | 1.26E-87  |
| AT4TE16085 | 10.25004 | 6.04E-37  |
| AT4TE18705 | 10.26228 | 1.14E-72  |
| AT2TE20205 | 10.26429 | 2.27E-56  |
| AT5TE42940 | 10.26509 | 2.08E-20  |
| AT1TE51735 | 10.26742 | 3.90E-106 |
| AT1TE46575 | 10.28164 | 1.17E-64  |
| AT5TE44735 | 10.28168 | 9.65E-47  |
| AT3TE55395 | 10.28381 | 2.67E-101 |
| AT2TE17600 | 10.28804 | 4.40E-99  |

|            |          |           |
|------------|----------|-----------|
| AT3TE49090 | 10.29139 | 5.50E-65  |
| AT2TE15880 | 10.29149 | 9.95E-103 |
| AT5TE52850 | 10.295   | 2.72E-47  |
| AT1TE60180 | 10.29909 | 2.44E-93  |
| AT1TE38940 | 10.32675 | 2.54E-98  |
| AT4TE17205 | 10.32908 | 3.35E-95  |
| AT3TE60425 | 10.34109 | 1.67E-44  |
| AT5TE48820 | 10.35952 | 2.03E-55  |
| AT2TE20590 | 10.36416 | 9.94E-49  |
| AT1TE51065 | 10.36805 | 1.18E-51  |
| AT5TE40425 | 10.37123 | 4.03E-90  |
| AT5TE42920 | 10.37442 | 6.47E-33  |
| AT5TE43615 | 10.38356 | 3.44E-83  |
| AT3TE53985 | 10.39546 | 1.59E-100 |
| AT5TE41425 | 10.40285 | 3.27E-54  |
| AT5TE43385 | 10.41209 | 9.76E-97  |
| AT4TE17115 | 10.41266 | 3.12E-43  |
| AT5TE41070 | 10.42836 | 2.39E-67  |
| AT3TE50570 | 10.43583 | 2.66E-49  |
| AT2TE12555 | 10.44358 | 1.69E-65  |
| AT4TE13990 | 10.46082 | 2.60E-24  |
| AT5TE43275 | 10.46176 | 2.58E-14  |
| AT3TE57050 | 10.47826 | 2.08E-48  |
| AT4G06688  | 10.47833 | 1.97E-40  |
| AT4TE10350 | 10.47842 | 4.04E-103 |
| AT3TE59560 | 10.47859 | 6.52E-51  |
| AT5TE43665 | 10.47914 | 1.76E-99  |
| AT4TE15030 | 10.48747 | 6.90E-95  |
| AT4TE17470 | 10.48769 | 4.23E-96  |
| AT3G30230  | 10.49808 | 1.03E-34  |
| AT3TE51250 | 10.51856 | 6.53E-79  |
| AT5TE41865 | 10.52043 | 4.11E-99  |
| AT5TE43980 | 10.52107 | 5.53E-94  |
| AT2TE11920 | 10.52203 | 4.04E-103 |
| AT3TE50605 | 10.52429 | 3.25E-27  |
| AT5TE43940 | 10.52751 | 9.02E-92  |
| AT4G16215  | 10.53036 | 2.07E-88  |
| AT5TE42355 | 10.55345 | 1.03E-70  |
| AT1TE42890 | 10.56568 | 1.22E-100 |
| AT5TE42135 | 10.57124 | 9.67E-69  |
| AT1TE41230 | 10.5736  | 6.23E-106 |
| AT5TE41795 | 10.58312 | 4.23E-97  |
| AT3TE51760 | 10.59677 | 1.73E-51  |
| AT2TE12030 | 10.59861 | 1.93E-100 |
| AT4TE18675 | 10.60419 | 3.40E-37  |
| AT3TE59100 | 10.62035 | 2.53E-36  |
| AT2TE22520 | 10.62081 | 7.76E-47  |
| AT4TE20800 | 10.62594 | 1.76E-99  |
| AT5TE43625 | 10.63634 | 1.20E-60  |

|            |          |           |
|------------|----------|-----------|
| AT4TE09175 | 10.63696 | 5.74E-60  |
| AT4G08691  | 10.6663  | 9.21E-93  |
| AT1TE45390 | 10.66815 | 1.44E-40  |
| AT5TE42660 | 10.67264 | 1.14E-31  |
| AT2TE22335 | 10.67904 | 1.48E-86  |
| AT5TE47160 | 10.68342 | 2.29E-53  |
| AT3TE51325 | 10.68459 | 1.97E-100 |
| AT5G35070  | 10.6851  | 1.42E-21  |
| AT3TE62975 | 10.68681 | 3.12E-83  |
| AT2TE42810 | 10.68693 | 2.49E-71  |
| AT2TE09640 | 10.691   | 5.01E-61  |
| AT3TE59455 | 10.71295 | 6.55E-35  |
| AT1TE45135 | 10.72867 | 9.20E-84  |
| AT3TE82555 | 10.73993 | 1.96E-60  |
| AT5G03090  | 10.75573 | 1.69E-61  |
| AT5TE42015 | 10.7929  | 7.21E-37  |
| AT2TE19625 | 10.79353 | 2.95E-75  |
| AT3TE55355 | 10.79466 | 4.16E-38  |
| AT4TE13485 | 10.79468 | 3.17E-59  |
| AT5TE39830 | 10.79737 | 1.49E-92  |
| AT1G59930  | 10.81473 | 4.79E-51  |
| AT3TE60285 | 10.82033 | 3.68E-92  |
| AT3TE60525 | 10.82611 | 1.02E-69  |
| AT1TE47745 | 10.8291  | 9.58E-45  |
| AT3TE58580 | 10.83237 | 8.45E-33  |
| AT4TE18670 | 10.83439 | 8.56E-66  |
| AT3TE59620 | 10.84498 | 8.43E-86  |
| AT4TE18715 | 10.86444 | 9.11E-67  |
| AT2G06562  | 10.89294 | 5.93E-91  |
| AT4TE18060 | 10.89685 | 1.68E-57  |
| AT1TE46665 | 10.90342 | 1.07E-53  |
| AT5TE51685 | 10.90659 | 3.78E-99  |
| AT2TE19600 | 10.91651 | 3.15E-64  |
| AT2TE17590 | 10.97608 | 6.91E-57  |
| AT4G29200  | 10.98402 | 5.65E-50  |
| AT5G15360  | 10.99078 | 2.47E-66  |
| AT3TE60550 | 10.99086 | 7.53E-100 |
| AT3TE57355 | 10.99733 | 1.64E-57  |
| AT1TE49850 | 11.00247 | 2.30E-73  |
| AT4TE15825 | 11.00626 | 2.39E-70  |
| AT4TE09055 | 11.01196 | 1.22E-65  |
| AT2TE24385 | 11.04687 | 6.23E-106 |
| AT1TE45385 | 11.05097 | 1.27E-44  |
| AT3TE50600 | 11.05172 | 2.03E-77  |
| AT3TE55340 | 11.06149 | 5.34E-76  |
| AT4TE15945 | 11.13921 | 5.19E-64  |
| AT4TE18655 | 11.14335 | 3.86E-64  |
| AT2TE17565 | 11.17592 | 5.21E-73  |
| AT1TE45380 | 11.19534 | 1.33E-54  |

|            |     |          |             |
|------------|-----|----------|-------------|
| AT3TE55370 |     | 11.22316 | 2.41E-84    |
| AT3TE60430 |     | 11.29761 | 9.90E-57    |
| AT4TE20125 |     | 11.29873 | 1.96E-87    |
| AT2TE13360 |     | 11.31445 | 1.19E-58    |
| AT4TE15420 |     | 11.33245 | 6.15E-43    |
| AT4TE13505 |     | 11.33699 | 1.73E-73    |
| AT2G10260  |     | 11.37864 | 8.44E-63    |
| AT3TE57345 |     | 11.38875 | 8.61E-57    |
| AT2TE19005 |     | 11.39117 | 1.57E-49    |
| AT3TE60560 |     | 11.39704 | 7.03E-88    |
| AT1G59920  |     | 11.42654 | 2.32E-66    |
| AT4TE19925 |     | 11.4322  | 2.24E-52    |
| AT3TE54705 |     | 11.44387 | 3.12E-43    |
| AT3TE53215 |     | 11.50767 | 8.33E-70    |
| AT1TE49845 |     | 11.53463 | 1.03E-46    |
| AT2TE19610 |     | 11.58086 | 1.84E-95    |
| AT4G07720  |     | 11.58337 | 2.63E-33    |
| AT5TE63610 |     | 11.59133 | 5.83E-83    |
| AT4TE23345 |     | 11.66236 | 6.93E-67    |
| AT1TE49955 |     | 11.68402 | 5.18E-92    |
| AT1G47660  |     | 11.68772 | 1.94E-29    |
| AT4TE18245 |     | 11.6998  | 4.53E-72    |
| AT3TE50675 |     | 11.83125 | 3.26E-69    |
| AT4TE07420 |     | 11.89782 | 2.17E-70    |
| AT3TE54700 |     | 11.94216 | 1.19E-26    |
| AT1TE62360 |     | 11.97149 | 4.98E-71    |
| AT3G24542  |     | 12.05171 | 1.62E-71    |
| AT1TE45375 |     | 12.25592 | 1.56E-72    |
| AT1TE54925 |     | 12.51734 | 3.36E-79    |
| AT2G11778  |     | 13.02167 | 6.89E-56    |
| AT1TE39515 |     | 13.06151 | 9.02E-92    |
| AT3TE47975 |     | 13.12869 | 7.68E-88    |
| AT1TE43225 | Inf |          | 1.79E-10    |
| AT1G11595  | Inf |          | 3.94E-24    |
| AT1G19040  | Inf |          | 1.44E-06    |
| AT1G19610  | Inf |          | 0.042773748 |
| AT1G23300  | Inf |          | 0.000264006 |
| AT1G27461  | Inf |          | 0.001795193 |
| AT1G27570  | Inf |          | 2.40E-31    |
| AT1G30784  | Inf |          | 3.39E-13    |
| AT1G32000  | Inf |          | 2.79E-34    |
| AT1G32010  | Inf |          | 1.12E-45    |
| AT1G32720  | Inf |          | 0.006566602 |
| AT1G33010  | Inf |          | 2.99E-06    |
| AT1G34041  | Inf |          | 0.002314592 |
| AT1G34070  | Inf |          | 0.036905218 |
| AT1G34400  | Inf |          | 0.031449422 |
| AT1G35500  | Inf |          | 7.05E-12    |
| AT1G36100  | Inf |          | 1.14E-17    |

|            |     |             |
|------------|-----|-------------|
| AT1G36230  | Inf | 0.001969929 |
| AT1G36240  | Inf | 7.36E-21    |
| AT1G36510  | Inf | 1.95E-06    |
| AT1G36640  | Inf | 0.00043175  |
| AT1G36660  | Inf | 0.000505859 |
| AT1G36745  | Inf | 1.70E-11    |
| AT1G37162  | Inf | 0.000736201 |
| AT1G40078  | Inf | 0.002292049 |
| AT1G41820  | Inf | 1.31E-07    |
| AT1G41890  | Inf | 5.80E-36    |
| AT1G42635  | Inf | 0.00014341  |
| AT1G42680  | Inf | 4.03E-14    |
| AT1G47765  | Inf | 0.008335238 |
| AT1G52950  | Inf | 0.005334189 |
| AT1G58300  | Inf | 0.003669526 |
| AT1G66920  | Inf | 0.02657049  |
| AT1TE04710 | Inf | 1.94E-12    |
| AT1TE14085 | Inf | 4.97E-63    |
| AT1TE19270 | Inf | 0.000401219 |
| AT1TE20090 | Inf | 1.43E-09    |
| AT1TE28375 | Inf | 0.022731005 |
| AT1TE30195 | Inf | 0.042941911 |
| AT1TE31935 | Inf | 1.38E-12    |
| AT1TE33490 | Inf | 1.99E-32    |
| AT1TE34580 | Inf | 1.11E-10    |
| AT1TE35720 | Inf | 3.00E-06    |
| AT1TE37215 | Inf | 2.98E-06    |
| AT1TE37265 | Inf | 0.009752572 |
| AT1TE38445 | Inf | 0.045883192 |
| AT1TE39375 | Inf | 3.28E-46    |
| AT1TE39880 | Inf | 0.010140066 |
| AT1TE40940 | Inf | 0.000252567 |
| AT1TE41345 | Inf | 3.44E-28    |
| AT1TE41460 | Inf | 0.000707089 |
| AT1TE41485 | Inf | 0.00837418  |
| AT1TE41580 | Inf | 4.17E-09    |
| AT1TE41735 | Inf | 0.001746576 |
| AT1TE42375 | Inf | 0.00178546  |
| AT1TE42380 | Inf | 9.25E-05    |
| AT1TE42395 | Inf | 0.011738905 |
| AT1TE42440 | Inf | 6.71E-06    |
| AT1TE42450 | Inf | 3.90E-05    |
| AT1TE42465 | Inf | 4.24E-30    |
| AT1TE42490 | Inf | 8.08E-17    |
| AT1TE43025 | Inf | 7.11E-13    |
| AT1TE43030 | Inf | 7.74E-07    |
| AT1TE43585 | Inf | 0.000821015 |
| AT1TE43910 | Inf | 0.002636164 |
| AT1TE44260 | Inf | 2.61E-08    |

|            |     |             |
|------------|-----|-------------|
| AT1TE44265 | Inf | 1.53E-15    |
| AT1TE44430 | Inf | 0.011991464 |
| AT1TE44525 | Inf | 0.000341229 |
| AT1TE44670 | Inf | 0.045080337 |
| AT1TE44825 | Inf | 4.15E-06    |
| AT1TE44875 | Inf | 4.95E-08    |
| AT1TE44890 | Inf | 0.008153306 |
| AT1TE44905 | Inf | 2.14E-23    |
| AT1TE44910 | Inf | 1.06E-23    |
| AT1TE45080 | Inf | 6.51E-07    |
| AT1TE45145 | Inf | 0.035298324 |
| AT1TE45180 | Inf | 0.000495185 |
| AT1TE45200 | Inf | 1.04E-05    |
| AT1TE45395 | Inf | 3.25E-05    |
| AT1TE45475 | Inf | 4.45E-08    |
| AT1TE45490 | Inf | 0.007401574 |
| AT1TE45710 | Inf | 4.52E-08    |
| AT1TE45790 | Inf | 2.91E-16    |
| AT1TE45795 | Inf | 0.007708807 |
| AT1TE45860 | Inf | 0.024471963 |
| AT1TE45870 | Inf | 5.77E-40    |
| AT1TE46140 | Inf | 5.66E-21    |
| AT1TE46265 | Inf | 3.07E-19    |
| AT1TE46270 | Inf | 0.028215264 |
| AT1TE46275 | Inf | 6.01E-12    |
| AT1TE46305 | Inf | 7.57E-27    |
| AT1TE46310 | Inf | 8.39E-31    |
| AT1TE46315 | Inf | 2.68E-05    |
| AT1TE46405 | Inf | 1.84E-06    |
| AT1TE46580 | Inf | 2.87E-20    |
| AT1TE46585 | Inf | 2.98E-06    |
| AT1TE46625 | Inf | 1.46E-31    |
| AT1TE46630 | Inf | 6.25E-05    |
| AT1TE46685 | Inf | 6.58E-05    |
| AT1TE46690 | Inf | 0.040930747 |
| AT1TE46755 | Inf | 2.49E-56    |
| AT1TE46785 | Inf | 0.001039776 |
| AT1TE46795 | Inf | 2.47E-16    |
| AT1TE46805 | Inf | 2.98E-12    |
| AT1TE46825 | Inf | 9.64E-41    |
| AT1TE46960 | Inf | 2.12E-06    |
| AT1TE47035 | Inf | 2.54E-11    |
| AT1TE47540 | Inf | 0.001006876 |
| AT1TE47550 | Inf | 1.21E-09    |
| AT1TE47570 | Inf | 5.84E-09    |
| AT1TE47595 | Inf | 0.003082952 |
| AT1TE47630 | Inf | 0.015980176 |
| AT1TE47705 | Inf | 4.84E-06    |
| AT1TE47715 | Inf | 7.19E-06    |



|            |     |             |
|------------|-----|-------------|
| AT1TE47720 | Inf | 0.000240246 |
| AT1TE47730 | Inf | 1.86E-09    |
| AT1TE47780 | Inf | 0.013796434 |
| AT1TE47880 | Inf | 2.02E-08    |
| AT1TE48025 | Inf | 1.63E-31    |
| AT1TE48045 | Inf | 2.72E-08    |
| AT1TE49260 | Inf | 2.72E-14    |
| AT1TE49330 | Inf | 1.08E-14    |
| AT1TE49755 | Inf | 2.65E-13    |
| AT1TE50895 | Inf | 1.22E-18    |
| AT1TE50985 | Inf | 0.001048154 |
| AT1TE51000 | Inf | 1.87E-10    |
| AT1TE51050 | Inf | 1.81E-05    |
| AT1TE51070 | Inf | 0.005762984 |
| AT1TE51175 | Inf | 1.37E-17    |
| AT1TE51180 | Inf | 0.016746749 |
| AT1TE51185 | Inf | 8.50E-05    |
| AT1TE51190 | Inf | 0.006378278 |
| AT1TE51260 | Inf | 0.001462798 |
| AT1TE51265 | Inf | 0.004949962 |
| AT1TE51270 | Inf | 0.00124337  |
| AT1TE51275 | Inf | 1.04E-07    |
| AT1TE51305 | Inf | 1.10E-05    |
| AT1TE51360 | Inf | 0.004149204 |
| AT1TE51475 | Inf | 0.013931285 |
| AT1TE51615 | Inf | 2.77E-16    |
| AT1TE51645 | Inf | 4.79E-19    |
| AT1TE51650 | Inf | 3.45E-11    |
| AT1TE51690 | Inf | 0.00106488  |
| AT1TE51810 | Inf | 4.92E-07    |
| AT1TE51870 | Inf | 0.019061129 |
| AT1TE51900 | Inf | 8.32E-08    |
| AT1TE51910 | Inf | 1.88E-14    |
| AT1TE51950 | Inf | 1.09E-06    |
| AT1TE51960 | Inf | 5.83E-18    |
| AT1TE51985 | Inf | 3.50E-06    |
| AT1TE51990 | Inf | 4.32E-07    |
| AT1TE52025 | Inf | 0.001494929 |
| AT1TE52090 | Inf | 0.004582946 |
| AT1TE52105 | Inf | 2.02E-35    |
| AT1TE52110 | Inf | 4.97E-39    |
| AT1TE52135 | Inf | 1.24E-12    |
| AT1TE52715 | Inf | 3.70E-11    |
| AT1TE52995 | Inf | 0.008324764 |
| AT1TE53000 | Inf | 0.04624047  |
| AT1TE53050 | Inf | 1.67E-25    |
| AT1TE53065 | Inf | 3.76E-53    |
| AT1TE53090 | Inf | 1.08E-16    |
| AT1TE53095 | Inf | 1.42E-20    |

|            |     |             |
|------------|-----|-------------|
| AT1TE53380 | Inf | 2.26E-16    |
| AT1TE53385 | Inf | 8.77E-22    |
| AT1TE53635 | Inf | 1.92E-42    |
| AT1TE53660 | Inf | 4.06E-30    |
| AT1TE53730 | Inf | 0.013740165 |
| AT1TE53765 | Inf | 0.004215059 |
| AT1TE53825 | Inf | 2.20E-22    |
| AT1TE53960 | Inf | 0.003596952 |
| AT1TE53970 | Inf | 0.018351527 |
| AT1TE53985 | Inf | 4.44E-06    |
| AT1TE53995 | Inf | 1.13E-09    |
| AT1TE54480 | Inf | 2.66E-24    |
| AT1TE54530 | Inf | 6.10E-14    |
| AT1TE54535 | Inf | 0.011477885 |
| AT1TE54545 | Inf | 8.15E-16    |
| AT1TE54650 | Inf | 9.08E-09    |
| AT1TE56120 | Inf | 1.60E-06    |
| AT1TE56235 | Inf | 0.000281542 |
| AT1TE57045 | Inf | 5.88E-08    |
| AT1TE57220 | Inf | 1.88E-28    |
| AT1TE58075 | Inf | 4.53E-44    |
| AT1TE58490 | Inf | 9.72E-05    |
| AT1TE58625 | Inf | 0.039310797 |
| AT1TE59135 | Inf | 3.29E-09    |
| AT1TE59175 | Inf | 1.26E-05    |
| AT1TE59745 | Inf | 6.03E-18    |
| AT1TE66380 | Inf | 1.38E-06    |
| AT1TE70490 | Inf | 0.005962129 |
| AT1TE76735 | Inf | 0.042460324 |
| AT1TE77165 | Inf | 0.000863521 |
| AT1TE96100 | Inf | 8.07E-05    |
| AT2G03934  | Inf | 1.56E-15    |
| AT2G05635  | Inf | 0.010027261 |
| AT2G05915  | Inf | 0.002349173 |
| AT2G06845  | Inf | 2.05E-41    |
| AT2G06904  | Inf | 1.57E-06    |
| AT2G07190  | Inf | 5.10E-07    |
| AT2G07200  | Inf | 0.005240146 |
| AT2G07213  | Inf | 3.24E-21    |
| AT2G07240  | Inf | 1.77E-24    |
| AT2G07280  | Inf | 1.22E-05    |
| AT2G07760  | Inf | 1.53E-12    |
| AT2G09388  | Inf | 0.010333681 |
| AT2G09840  | Inf | 5.34E-08    |
| AT2G10430  | Inf | 0.013547397 |
| AT2G10965  | Inf | 7.79E-05    |
| AT2G10975  | Inf | 0.009742228 |
| AT2G11015  | Inf | 0.000251508 |
| AT2G11271  | Inf | 0.000625324 |

|            |     |             |
|------------|-----|-------------|
| AT2G11623  | Inf | 7.57E-09    |
| AT2G11930  | Inf | 1.33E-32    |
| AT2G11983  | Inf | 1.48E-15    |
| AT2G12050  | Inf | 5.30E-12    |
| AT2G12875  | Inf | 0.045805721 |
| AT2G12935  | Inf | 2.72E-09    |
| AT2G13770  | Inf | 0.017181432 |
| AT2G13950  | Inf | 0.021053598 |
| AT2G14410  | Inf | 1.43E-42    |
| AT2G15110  | Inf | 5.59E-45    |
| AT2G15420  | Inf | 3.74E-13    |
| AT2G18660  | Inf | 0.000160779 |
| AT2G24750  | Inf | 3.85E-05    |
| AT2G24780  | Inf | 3.06E-08    |
| AT2G40955  | Inf | 0.00118757  |
| AT2G43865  | Inf | 3.84E-09    |
| AT2G45220  | Inf | 0.008511721 |
| AT2TE00030 | Inf | 2.30E-08    |
| AT2TE01000 | Inf | 0.016746749 |
| AT2TE02465 | Inf | 0.049708224 |
| AT2TE02595 | Inf | 0.012579898 |
| AT2TE03625 | Inf | 0.004461983 |
| AT2TE05410 | Inf | 1.72E-05    |
| AT2TE05440 | Inf | 3.01E-09    |
| AT2TE06040 | Inf | 0.000471648 |
| AT2TE06615 | Inf | 8.79E-25    |
| AT2TE08110 | Inf | 5.37E-05    |
| AT2TE08120 | Inf | 3.94E-11    |
| AT2TE08320 | Inf | 5.10E-20    |
| AT2TE08665 | Inf | 5.11E-16    |
| AT2TE08785 | Inf | 3.28E-08    |
| AT2TE09100 | Inf | 2.30E-09    |
| AT2TE09615 | Inf | 1.38E-05    |
| AT2TE09625 | Inf | 0.004762462 |
| AT2TE09635 | Inf | 6.96E-29    |
| AT2TE10265 | Inf | 3.83E-06    |
| AT2TE10585 | Inf | 0.028296381 |
| AT2TE10985 | Inf | 9.70E-29    |
| AT2TE11010 | Inf | 0.003900432 |
| AT2TE11015 | Inf | 3.44E-19    |
| AT2TE11040 | Inf | 0.040323344 |
| AT2TE11050 | Inf | 1.55E-23    |
| AT2TE11110 | Inf | 2.68E-07    |
| AT2TE11145 | Inf | 9.35E-06    |
| AT2TE11315 | Inf | 6.54E-12    |
| AT2TE11360 | Inf | 0.000266526 |
| AT2TE11500 | Inf | 0.013989784 |
| AT2TE11515 | Inf | 1.14E-08    |
| AT2TE11540 | Inf | 1.33E-10    |

|            |     |             |
|------------|-----|-------------|
| AT2TE11555 | Inf | 1.26E-20    |
| AT2TE11560 | Inf | 7.24E-08    |
| AT2TE11765 | Inf | 1.33E-17    |
| AT2TE11960 | Inf | 9.00E-59    |
| AT2TE12225 | Inf | 0.002458151 |
| AT2TE12230 | Inf | 0.000108227 |
| AT2TE12295 | Inf | 1.23E-05    |
| AT2TE12300 | Inf | 9.47E-08    |
| AT2TE12305 | Inf | 0.005296422 |
| AT2TE12310 | Inf | 5.34E-09    |
| AT2TE12315 | Inf | 4.86E-09    |
| AT2TE12450 | Inf | 0.000920197 |
| AT2TE12470 | Inf | 1.18E-23    |
| AT2TE12660 | Inf | 0.02596122  |
| AT2TE12825 | Inf | 3.72E-58    |
| AT2TE12960 | Inf | 0.004732594 |
| AT2TE13025 | Inf | 5.32E-14    |
| AT2TE13080 | Inf | 8.02E-11    |
| AT2TE13145 | Inf | 0.000541317 |
| AT2TE13245 | Inf | 0.014297549 |
| AT2TE13340 | Inf | 1.00E-27    |
| AT2TE13355 | Inf | 4.62E-05    |
| AT2TE13385 | Inf | 0.027657796 |
| AT2TE13440 | Inf | 2.92E-15    |
| AT2TE13865 | Inf | 0.002074481 |
| AT2TE13870 | Inf | 2.67E-19    |
| AT2TE13950 | Inf | 2.16E-11    |
| AT2TE13955 | Inf | 0.007751407 |
| AT2TE15410 | Inf | 6.65E-05    |
| AT2TE15570 | Inf | 1.84E-09    |
| AT2TE15590 | Inf | 9.75E-05    |
| AT2TE16010 | Inf | 7.82E-07    |
| AT2TE16030 | Inf | 5.25E-24    |
| AT2TE16190 | Inf | 0.006246093 |
| AT2TE16365 | Inf | 2.79E-06    |
| AT2TE16385 | Inf | 0.010196895 |
| AT2TE16390 | Inf | 1.73E-15    |
| AT2TE16510 | Inf | 2.10E-15    |
| AT2TE16545 | Inf | 0.030457727 |
| AT2TE16560 | Inf | 2.86E-05    |
| AT2TE16565 | Inf | 0.006121031 |
| AT2TE16570 | Inf | 1.42E-11    |
| AT2TE16600 | Inf | 1.28E-05    |
| AT2TE16605 | Inf | 2.04E-06    |
| AT2TE16665 | Inf | 0.00198439  |
| AT2TE16800 | Inf | 2.31E-08    |
| AT2TE16815 | Inf | 0.000840103 |
| AT2TE16825 | Inf | 3.01E-63    |
| AT2TE16850 | Inf | 1.96E-06    |

|            |     |             |
|------------|-----|-------------|
| AT2TE16870 | Inf | 2.39E-08    |
| AT2TE17095 | Inf | 2.07E-19    |
| AT2TE17115 | Inf | 0.005453332 |
| AT2TE17305 | Inf | 1.43E-16    |
| AT2TE17555 | Inf | 5.63E-08    |
| AT2TE17640 | Inf | 3.94E-13    |
| AT2TE17645 | Inf | 0.028572878 |
| AT2TE17650 | Inf | 3.23E-19    |
| AT2TE17730 | Inf | 0.000204468 |
| AT2TE17870 | Inf | 0.024914923 |
| AT2TE17875 | Inf | 1.73E-06    |
| AT2TE17940 | Inf | 0.009263809 |
| AT2TE17985 | Inf | 2.40E-19    |
| AT2TE18005 | Inf | 0.02994879  |
| AT2TE18025 | Inf | 2.49E-05    |
| AT2TE18335 | Inf | 1.25E-19    |
| AT2TE18410 | Inf | 3.22E-41    |
| AT2TE18440 | Inf | 1.27E-32    |
| AT2TE18450 | Inf | 2.51E-50    |
| AT2TE18695 | Inf | 0.033003289 |
| AT2TE18830 | Inf | 3.10E-07    |
| AT2TE18860 | Inf | 0.005026914 |
| AT2TE18875 | Inf | 0.001019366 |
| AT2TE18885 | Inf | 8.81E-14    |
| AT2TE18895 | Inf | 3.34E-06    |
| AT2TE18980 | Inf | 2.29E-05    |
| AT2TE19075 | Inf | 1.48E-12    |
| AT2TE19125 | Inf | 0.042773748 |
| AT2TE19160 | Inf | 2.82E-05    |
| AT2TE19240 | Inf | 7.36E-05    |
| AT2TE19350 | Inf | 0.04532599  |
| AT2TE19430 | Inf | 1.15E-26    |
| AT2TE19475 | Inf | 2.59E-20    |
| AT2TE19480 | Inf | 1.33E-06    |
| AT2TE19500 | Inf | 0.04580822  |
| AT2TE19515 | Inf | 0.031091449 |
| AT2TE19535 | Inf | 0.004168289 |
| AT2TE19590 | Inf | 1.96E-59    |
| AT2TE19615 | Inf | 2.25E-37    |
| AT2TE19620 | Inf | 6.69E-15    |
| AT2TE19660 | Inf | 0.023186558 |
| AT2TE19855 | Inf | 0.005555524 |
| AT2TE19970 | Inf | 2.92E-05    |
| AT2TE19985 | Inf | 1.58E-06    |
| AT2TE20000 | Inf | 1.05E-14    |
| AT2TE20005 | Inf | 0.011124265 |
| AT2TE20010 | Inf | 0.019951015 |
| AT2TE20045 | Inf | 0.023742125 |
| AT2TE20105 | Inf | 3.04E-07    |

|            |     |             |
|------------|-----|-------------|
| AT2TE20110 | Inf | 0.030935945 |
| AT2TE20160 | Inf | 0.01598856  |
| AT2TE20230 | Inf | 0.039312031 |
| AT2TE20260 | Inf | 1.22E-05    |
| AT2TE20330 | Inf | 0.012953242 |
| AT2TE20335 | Inf | 2.39E-09    |
| AT2TE20420 | Inf | 2.06E-05    |
| AT2TE20435 | Inf | 5.53E-18    |
| AT2TE20440 | Inf | 1.24E-34    |
| AT2TE20445 | Inf | 1.08E-50    |
| AT2TE20450 | Inf | 4.68E-35    |
| AT2TE20600 | Inf | 0.002742541 |
| AT2TE20605 | Inf | 7.32E-15    |
| AT2TE20665 | Inf | 4.01E-08    |
| AT2TE20735 | Inf | 4.77E-24    |
| AT2TE20930 | Inf | 0.038198557 |
| AT2TE20960 | Inf | 4.59E-09    |
| AT2TE20965 | Inf | 0.001488649 |
| AT2TE21065 | Inf | 0.014511996 |
| AT2TE21100 | Inf | 4.13E-16    |
| AT2TE21225 | Inf | 0.032417109 |
| AT2TE21295 | Inf | 2.01E-29    |
| AT2TE21450 | Inf | 3.59E-05    |
| AT2TE21525 | Inf | 3.79E-09    |
| AT2TE21530 | Inf | 8.73E-30    |
| AT2TE21535 | Inf | 4.33E-13    |
| AT2TE21545 | Inf | 1.13E-09    |
| AT2TE21555 | Inf | 8.77E-10    |
| AT2TE21610 | Inf | 0.000946996 |
| AT2TE21705 | Inf | 0.000205762 |
| AT2TE21730 | Inf | 0.02237573  |
| AT2TE21745 | Inf | 3.47E-11    |
| AT2TE21760 | Inf | 1.83E-14    |
| AT2TE21765 | Inf | 3.57E-10    |
| AT2TE21855 | Inf | 2.43E-47    |
| AT2TE22065 | Inf | 6.47E-13    |
| AT2TE22175 | Inf | 0.000382694 |
| AT2TE22185 | Inf | 1.22E-30    |
| AT2TE22225 | Inf | 0.014982796 |
| AT2TE22230 | Inf | 2.53E-10    |
| AT2TE22245 | Inf | 8.33E-09    |
| AT2TE22505 | Inf | 2.82E-31    |
| AT2TE22550 | Inf | 1.37E-07    |
| AT2TE22565 | Inf | 0.00499005  |
| AT2TE22635 | Inf | 0.002930568 |
| AT2TE23120 | Inf | 0.005555524 |
| AT2TE23175 | Inf | 5.47E-13    |
| AT2TE23210 | Inf | 0.00011921  |
| AT2TE23510 | Inf | 2.42E-05    |

|            |     |             |
|------------|-----|-------------|
| AT2TE23940 | Inf | 4.97E-05    |
| AT2TE24250 | Inf | 0.000907279 |
| AT2TE24335 | Inf | 0.003509229 |
| AT2TE24850 | Inf | 7.81E-05    |
| AT2TE25095 | Inf | 0.013760797 |
| AT2TE25350 | Inf | 1.50E-07    |
| AT2TE25360 | Inf | 6.38E-36    |
| AT2TE25515 | Inf | 0.001373557 |
| AT2TE25520 | Inf | 1.63E-12    |
| AT2TE25840 | Inf | 4.14E-14    |
| AT2TE26230 | Inf | 4.82E-48    |
| AT2TE26275 | Inf | 4.01E-06    |
| AT2TE26285 | Inf | 0.016314851 |
| AT2TE26360 | Inf | 0.042609088 |
| AT2TE26380 | Inf | 4.67E-16    |
| AT2TE26450 | Inf | 1.04E-07    |
| AT2TE26470 | Inf | 0.001186784 |
| AT2TE26680 | Inf | 4.47E-35    |
| AT2TE26685 | Inf | 1.67E-08    |
| AT2TE26875 | Inf | 0.002994488 |
| AT2TE27460 | Inf | 7.95E-24    |
| AT2TE27470 | Inf | 9.46E-06    |
| AT2TE27950 | Inf | 0.001865995 |
| AT2TE28030 | Inf | 5.03E-25    |
| AT2TE28035 | Inf | 0.00194857  |
| AT2TE28160 | Inf | 3.25E-07    |
| AT2TE28260 | Inf | 3.10E-05    |
| AT2TE28285 | Inf | 3.90E-12    |
| AT2TE28430 | Inf | 0.000671907 |
| AT2TE28565 | Inf | 0.001062719 |
| AT2TE28755 | Inf | 0.000288093 |
| AT2TE29220 | Inf | 0.037450417 |
| AT2TE29340 | Inf | 1.24E-05    |
| AT2TE29450 | Inf | 3.89E-15    |
| AT2TE38900 | Inf | 1.51E-21    |
| AT2TE38905 | Inf | 8.82E-06    |
| AT2TE41090 | Inf | 2.13E-11    |
| AT2TE45205 | Inf | 0.004949962 |
| AT2TE45465 | Inf | 5.91E-34    |
| AT2TE69490 | Inf | 0.021715002 |
| AT2TE69630 | Inf | 6.36E-08    |
| AT2TE78935 | Inf | 0.000965751 |
| AT2TE78940 | Inf | 6.82E-12    |
| AT3G10950  | Inf | 1.05E-05    |
| AT3G15250  | Inf | 4.37E-05    |
| AT3G23970  | Inf | 0.006676084 |
| AT3G25719  | Inf | 0.001124453 |
| AT3G25720  | Inf | 2.18E-05    |
| AT3G28410  | Inf | 0.002297028 |

|            |     |             |
|------------|-----|-------------|
| AT3G29638  | Inf | 0.000625324 |
| AT3G30820  | Inf | 6.42E-58    |
| AT3G30867  | Inf | 5.81E-10    |
| AT3G31350  | Inf | 9.45E-20    |
| AT3G31430  | Inf | 0.016470474 |
| AT3G31908  | Inf | 0.000253125 |
| AT3G31950  | Inf | 0.016458342 |
| AT3G32160  | Inf | 0.000279675 |
| AT3G32180  | Inf | 3.59E-07    |
| AT3G33025  | Inf | 5.13E-05    |
| AT3G33293  | Inf | 0.008828084 |
| AT3G42060  | Inf | 0.000624172 |
| AT3G42628  | Inf | 0.025391545 |
| AT3G42723  | Inf | 2.32E-24    |
| AT3G43150  | Inf | 5.92E-07    |
| AT3G43290  | Inf | 0.012640941 |
| AT3G43490  | Inf | 0.001356328 |
| AT3G43572  | Inf | 0.001260928 |
| AT3G43574  | Inf | 4.64E-10    |
| AT3G43826  | Inf | 0.000694148 |
| AT3G45510  | Inf | 9.04E-13    |
| AT3G45820  | Inf | 9.87E-18    |
| AT3G49230  | Inf | 0.036048144 |
| AT3G50320  | Inf | 0.000413906 |
| AT3G50540  | Inf | 0.000110398 |
| AT3G53910  | Inf | 6.04E-10    |
| AT3G54530  | Inf | 0.001412711 |
| AT3TE11850 | Inf | 0.023032469 |
| AT3TE18050 | Inf | 0.034513291 |
| AT3TE34420 | Inf | 2.41E-05    |
| AT3TE34430 | Inf | 4.03E-15    |
| AT3TE37060 | Inf | 0.014785408 |
| AT3TE37110 | Inf | 0.027156952 |
| AT3TE37690 | Inf | 5.27E-26    |
| AT3TE38565 | Inf | 0.010211252 |
| AT3TE38995 | Inf | 0.001018745 |
| AT3TE39220 | Inf | 0.007887461 |
| AT3TE40135 | Inf | 0.015073436 |
| AT3TE40145 | Inf | 1.17E-10    |
| AT3TE40720 | Inf | 1.65E-05    |
| AT3TE41640 | Inf | 3.47E-05    |
| AT3TE42280 | Inf | 0.007603223 |
| AT3TE43545 | Inf | 0.002209486 |
| AT3TE43745 | Inf | 0.001439657 |
| AT3TE44950 | Inf | 3.13E-64    |
| AT3TE45800 | Inf | 6.82E-15    |
| AT3TE46350 | Inf | 8.72E-05    |
| AT3TE47235 | Inf | 8.79E-61    |
| AT3TE47370 | Inf | 4.38E-15    |



|            |     |             |
|------------|-----|-------------|
| AT3TE47560 | Inf | 0.000392942 |
| AT3TE47595 | Inf | 0.012132596 |
| AT3TE47620 | Inf | 4.55E-16    |
| AT3TE47625 | Inf | 0.000178139 |
| AT3TE47755 | Inf | 2.84E-05    |
| AT3TE47770 | Inf | 6.42E-09    |
| AT3TE47775 | Inf | 2.42E-17    |
| AT3TE47890 | Inf | 0.00708204  |
| AT3TE47980 | Inf | 0.034513291 |
| AT3TE47985 | Inf | 0.000368193 |
| AT3TE48140 | Inf | 2.57E-09    |
| AT3TE48365 | Inf | 0.000734914 |
| AT3TE49420 | Inf | 5.01E-19    |
| AT3TE49545 | Inf | 9.75E-06    |
| AT3TE49720 | Inf | 1.90E-28    |
| AT3TE49725 | Inf | 4.50E-13    |
| AT3TE50020 | Inf | 1.68E-37    |
| AT3TE50030 | Inf | 2.93E-05    |
| AT3TE50040 | Inf | 0.013256039 |
| AT3TE50050 | Inf | 6.27E-14    |
| AT3TE50055 | Inf | 0.009658814 |
| AT3TE50120 | Inf | 1.32E-05    |
| AT3TE50125 | Inf | 4.03E-19    |
| AT3TE50165 | Inf | 0.001892026 |
| AT3TE50560 | Inf | 1.14E-43    |
| AT3TE50650 | Inf | 0.000262382 |
| AT3TE50655 | Inf | 2.99E-60    |
| AT3TE50775 | Inf | 1.86E-34    |
| AT3TE50875 | Inf | 0.027568744 |
| AT3TE51285 | Inf | 0.017868383 |
| AT3TE51290 | Inf | 3.57E-27    |
| AT3TE51300 | Inf | 4.59E-47    |
| AT3TE51535 | Inf | 4.20E-12    |
| AT3TE51565 | Inf | 0.027765243 |
| AT3TE51620 | Inf | 0.028366882 |
| AT3TE51630 | Inf | 1.72E-06    |
| AT3TE51635 | Inf | 0.015558209 |
| AT3TE51640 | Inf | 3.36E-07    |
| AT3TE51650 | Inf | 6.00E-43    |
| AT3TE51670 | Inf | 2.98E-13    |
| AT3TE51685 | Inf | 0.009658814 |
| AT3TE51740 | Inf | 6.47E-06    |
| AT3TE51810 | Inf | 9.74E-06    |
| AT3TE51895 | Inf | 2.13E-16    |
| AT3TE51900 | Inf | 3.20E-14    |
| AT3TE52020 | Inf | 4.03E-19    |
| AT3TE52215 | Inf | 6.59E-10    |
| AT3TE52225 | Inf | 9.63E-05    |
| AT3TE52280 | Inf | 0.004405717 |

|            |     |             |
|------------|-----|-------------|
| AT3TE52300 | Inf | 5.25E-28    |
| AT3TE52325 | Inf | 3.27E-21    |
| AT3TE52365 | Inf | 0.000622373 |
| AT3TE52445 | Inf | 3.74E-05    |
| AT3TE52510 | Inf | 9.40E-11    |
| AT3TE52550 | Inf | 5.56E-25    |
| AT3TE52630 | Inf | 1.05E-15    |
| AT3TE52665 | Inf | 2.10E-33    |
| AT3TE52800 | Inf | 5.52E-05    |
| AT3TE52805 | Inf | 0.000218349 |
| AT3TE52935 | Inf | 4.09E-12    |
| AT3TE53095 | Inf | 6.79E-15    |
| AT3TE53100 | Inf | 1.24E-05    |
| AT3TE53130 | Inf | 0.002012417 |
| AT3TE53195 | Inf | 0.004324026 |
| AT3TE53295 | Inf | 0.029318792 |
| AT3TE53490 | Inf | 0.020627846 |
| AT3TE53495 | Inf | 2.45E-07    |
| AT3TE53590 | Inf | 0.00066384  |
| AT3TE53600 | Inf | 8.07E-08    |
| AT3TE53615 | Inf | 8.60E-08    |
| AT3TE53755 | Inf | 0.016143713 |
| AT3TE53765 | Inf | 1.16E-07    |
| AT3TE53835 | Inf | 2.80E-05    |
| AT3TE53845 | Inf | 0.000683333 |
| AT3TE53850 | Inf | 1.45E-63    |
| AT3TE53965 | Inf | 0.00473869  |
| AT3TE54000 | Inf | 3.07E-62    |
| AT3TE54180 | Inf | 5.74E-39    |
| AT3TE54185 | Inf | 1.54E-08    |
| AT3TE54385 | Inf | 1.61E-05    |
| AT3TE54500 | Inf | 1.20E-13    |
| AT3TE54510 | Inf | 0.00243491  |
| AT3TE54690 | Inf | 3.79E-09    |
| AT3TE54695 | Inf | 9.77E-22    |
| AT3TE54735 | Inf | 4.05E-40    |
| AT3TE54780 | Inf | 3.29E-09    |
| AT3TE54815 | Inf | 1.42E-09    |
| AT3TE54845 | Inf | 1.26E-16    |
| AT3TE54865 | Inf | 1.11E-07    |
| AT3TE54985 | Inf | 2.96E-12    |
| AT3TE55025 | Inf | 3.18E-17    |
| AT3TE55030 | Inf | 0.000384917 |
| AT3TE55155 | Inf | 1.56E-17    |
| AT3TE55160 | Inf | 3.55E-06    |
| AT3TE55350 | Inf | 0.00308593  |
| AT3TE55425 | Inf | 0.00576855  |
| AT3TE55440 | Inf | 0.01136311  |
| AT3TE56630 | Inf | 1.31E-05    |

|            |     |             |
|------------|-----|-------------|
| AT3TE56640 | Inf | 3.75E-06    |
| AT3TE56710 | Inf | 1.51E-05    |
| AT3TE56730 | Inf | 0.001963742 |
| AT3TE57090 | Inf | 9.61E-06    |
| AT3TE57095 | Inf | 0.002046275 |
| AT3TE57100 | Inf | 1.36E-07    |
| AT3TE57110 | Inf | 2.25E-37    |
| AT3TE57160 | Inf | 7.64E-06    |
| AT3TE57165 | Inf | 0.032609835 |
| AT3TE57215 | Inf | 0.002933394 |
| AT3TE57275 | Inf | 2.59E-09    |
| AT3TE57350 | Inf | 0.040500432 |
| AT3TE57360 | Inf | 3.62E-42    |
| AT3TE57365 | Inf | 7.58E-08    |
| AT3TE57435 | Inf | 0.000398474 |
| AT3TE57445 | Inf | 5.47E-24    |
| AT3TE57470 | Inf | 2.48E-16    |
| AT3TE57525 | Inf | 3.34E-06    |
| AT3TE57550 | Inf | 0.005172907 |
| AT3TE57555 | Inf | 0.002437649 |
| AT3TE57565 | Inf | 1.60E-14    |
| AT3TE57575 | Inf | 0.020908725 |
| AT3TE57600 | Inf | 5.00E-19    |
| AT3TE57655 | Inf | 0.010263945 |
| AT3TE57660 | Inf | 0.024032074 |
| AT3TE58090 | Inf | 2.90E-09    |
| AT3TE58495 | Inf | 0.000744908 |
| AT3TE58560 | Inf | 0.000109529 |
| AT3TE58575 | Inf | 1.30E-12    |
| AT3TE58585 | Inf | 9.16E-22    |
| AT3TE58590 | Inf | 0.000284705 |
| AT3TE58605 | Inf | 1.22E-43    |
| AT3TE58620 | Inf | 6.25E-27    |
| AT3TE58625 | Inf | 0.001566408 |
| AT3TE58630 | Inf | 1.11E-22    |
| AT3TE58655 | Inf | 1.51E-40    |
| AT3TE58745 | Inf | 2.67E-06    |
| AT3TE58900 | Inf | 2.56E-37    |
| AT3TE59040 | Inf | 1.57E-07    |
| AT3TE59055 | Inf | 6.76E-05    |
| AT3TE59085 | Inf | 9.33E-12    |
| AT3TE59105 | Inf | 2.51E-29    |
| AT3TE59155 | Inf | 3.67E-15    |
| AT3TE59160 | Inf | 1.08E-07    |
| AT3TE59290 | Inf | 3.25E-06    |
| AT3TE59335 | Inf | 0.000624018 |
| AT3TE59480 | Inf | 0.002717026 |
| AT3TE59535 | Inf | 0.017226008 |
| AT3TE59545 | Inf | 1.19E-09    |

|            |     |             |
|------------|-----|-------------|
| AT3TE59580 | Inf | 0.000577205 |
| AT3TE59610 | Inf | 1.24E-34    |
| AT3TE59695 | Inf | 0.006586626 |
| AT3TE59855 | Inf | 0.001038976 |
| AT3TE59880 | Inf | 7.56E-08    |
| AT3TE59895 | Inf | 0.003355121 |
| AT3TE60020 | Inf | 1.15E-08    |
| AT3TE60155 | Inf | 3.24E-15    |
| AT3TE60205 | Inf | 1.64E-09    |
| AT3TE60295 | Inf | 3.03E-06    |
| AT3TE60410 | Inf | 1.12E-23    |
| AT3TE60465 | Inf | 8.06E-09    |
| AT3TE60555 | Inf | 3.49E-25    |
| AT3TE60610 | Inf | 7.83E-06    |
| AT3TE60740 | Inf | 0.030087129 |
| AT3TE60915 | Inf | 0.000947216 |
| AT3TE60925 | Inf | 0.000677552 |
| AT3TE61020 | Inf | 0.031635443 |
| AT3TE61070 | Inf | 3.45E-23    |
| AT3TE61295 | Inf | 0.002568316 |
| AT3TE61305 | Inf | 0.049563399 |
| AT3TE61315 | Inf | 0.016739393 |
| AT3TE61400 | Inf | 7.42E-09    |
| AT3TE61480 | Inf | 2.63E-13    |
| AT3TE61530 | Inf | 3.54E-06    |
| AT3TE61535 | Inf | 6.45E-18    |
| AT3TE61610 | Inf | 1.65E-06    |
| AT3TE61640 | Inf | 4.28E-26    |
| AT3TE62010 | Inf | 0.042460324 |
| AT3TE62020 | Inf | 0.027681467 |
| AT3TE62130 | Inf | 9.24E-12    |
| AT3TE62215 | Inf | 5.13E-09    |
| AT3TE62260 | Inf | 7.44E-11    |
| AT3TE62390 | Inf | 7.09E-40    |
| AT3TE62395 | Inf | 7.83E-64    |
| AT3TE62450 | Inf | 0.01431026  |
| AT3TE62455 | Inf | 1.83E-05    |
| AT3TE62570 | Inf | 1.19E-24    |
| AT3TE62595 | Inf | 2.86E-30    |
| AT3TE62655 | Inf | 0.002420177 |
| AT3TE62780 | Inf | 2.14E-14    |
| AT3TE62940 | Inf | 0.003147092 |
| AT3TE63020 | Inf | 0.000132355 |
| AT3TE63035 | Inf | 3.00E-42    |
| AT3TE63040 | Inf | 2.23E-42    |
| AT3TE63165 | Inf | 3.03E-11    |
| AT3TE63200 | Inf | 0.01866367  |
| AT3TE63205 | Inf | 1.49E-14    |
| AT3TE63210 | Inf | 0.000124463 |

|            |     |             |
|------------|-----|-------------|
| AT3TE63465 | Inf | 4.04E-27    |
| AT3TE64770 | Inf | 4.94E-11    |
| AT3TE65100 | Inf | 4.41E-08    |
| AT3TE66875 | Inf | 1.07E-22    |
| AT3TE67295 | Inf | 5.76E-14    |
| AT3TE67540 | Inf | 4.53E-16    |
| AT3TE67745 | Inf | 0.000569741 |
| AT3TE70590 | Inf | 1.34E-05    |
| AT3TE90545 | Inf | 2.99E-13    |
| AT3TE90570 | Inf | 0.000430328 |
| AT3TE92350 | Inf | 3.51E-08    |
| AT4G03570  | Inf | 1.07E-22    |
| AT4G03723  | Inf | 7.49E-20    |
| AT4G03950  | Inf | 3.82E-38    |
| AT4G04030  | Inf | 5.81E-37    |
| AT4G04580  | Inf | 0.02012725  |
| AT4G04653  | Inf | 5.44E-05    |
| AT4G04775  | Inf | 0.000176127 |
| AT4G06608  | Inf | 1.20E-20    |
| AT4G06641  | Inf | 3.15E-13    |
| AT4G07524  | Inf | 6.90E-15    |
| AT4G08190  | Inf | 1.80E-07    |
| AT4G09360  | Inf | 0.000317935 |
| AT4G15393  | Inf | 4.45E-09    |
| AT4G18150  | Inf | 1.78E-54    |
| AT4G19239  | Inf | 2.32E-42    |
| AT4G20860  | Inf | 0.003162579 |
| AT4G23210  | Inf | 0.000132218 |
| AT4TE00230 | Inf | 0.00045745  |
| AT4TE07395 | Inf | 0.039462641 |
| AT4TE07415 | Inf | 0.007137874 |
| AT4TE08260 | Inf | 0.045011793 |
| AT4TE08435 | Inf | 1.40E-23    |
| AT4TE08445 | Inf | 5.06E-29    |
| AT4TE08450 | Inf | 0.04257496  |
| AT4TE08985 | Inf | 0.001881101 |
| AT4TE09060 | Inf | 3.55E-45    |
| AT4TE09135 | Inf | 8.73E-10    |
| AT4TE09165 | Inf | 2.24E-06    |
| AT4TE09250 | Inf | 1.79E-08    |
| AT4TE09385 | Inf | 2.48E-17    |
| AT4TE09455 | Inf | 1.24E-06    |
| AT4TE09460 | Inf | 1.54E-09    |
| AT4TE09480 | Inf | 2.89E-18    |
| AT4TE09505 | Inf | 1.55E-20    |
| AT4TE09540 | Inf | 9.43E-06    |
| AT4TE09545 | Inf | 0.000198063 |
| AT4TE09550 | Inf | 0.003803391 |
| AT4TE09560 | Inf | 2.09E-14    |

|            |     |             |
|------------|-----|-------------|
| AT4TE09570 | Inf | 3.25E-29    |
| AT4TE09780 | Inf | 4.92E-16    |
| AT4TE09810 | Inf | 6.77E-08    |
| AT4TE10210 | Inf | 1.57E-42    |
| AT4TE10255 | Inf | 0.000281542 |
| AT4TE10335 | Inf | 0.006424076 |
| AT4TE10490 | Inf | 0.024325053 |
| AT4TE10680 | Inf | 0.000126966 |
| AT4TE10980 | Inf | 0.003252289 |
| AT4TE10985 | Inf | 0.041538043 |
| AT4TE12570 | Inf | 0.005190872 |
| AT4TE12615 | Inf | 0.013220075 |
| AT4TE12620 | Inf | 0.001210049 |
| AT4TE13060 | Inf | 0.000971659 |
| AT4TE13070 | Inf | 1.43E-22    |
| AT4TE13290 | Inf | 2.68E-05    |
| AT4TE13295 | Inf | 0.001168197 |
| AT4TE13515 | Inf | 9.85E-14    |
| AT4TE13555 | Inf | 5.33E-06    |
| AT4TE13565 | Inf | 1.40E-14    |
| AT4TE13985 | Inf | 1.18E-09    |
| AT4TE14035 | Inf | 8.16E-11    |
| AT4TE14065 | Inf | 3.84E-05    |
| AT4TE14130 | Inf | 1.57E-31    |
| AT4TE14135 | Inf | 7.78E-21    |
| AT4TE14210 | Inf | 0.003942699 |
| AT4TE14225 | Inf | 0.001935879 |
| AT4TE14230 | Inf | 0.003220976 |
| AT4TE14240 | Inf | 1.43E-08    |
| AT4TE14445 | Inf | 1.84E-05    |
| AT4TE14490 | Inf | 0.001039776 |
| AT4TE15005 | Inf | 1.24E-06    |
| AT4TE15010 | Inf | 0.002566628 |
| AT4TE15115 | Inf | 5.62E-07    |
| AT4TE15195 | Inf | 0.00449449  |
| AT4TE15260 | Inf | 2.33E-29    |
| AT4TE15285 | Inf | 4.85E-38    |
| AT4TE15380 | Inf | 1.24E-28    |
| AT4TE15415 | Inf | 3.26E-05    |
| AT4TE15435 | Inf | 4.48E-28    |
| AT4TE15475 | Inf | 8.13E-10    |
| AT4TE15490 | Inf | 0.000432665 |
| AT4TE15495 | Inf | 0.000824097 |
| AT4TE15500 | Inf | 2.60E-12    |
| AT4TE15525 | Inf | 4.60E-16    |
| AT4TE15555 | Inf | 6.13E-20    |
| AT4TE15585 | Inf | 1.66E-26    |
| AT4TE15615 | Inf | 7.28E-06    |
| AT4TE15740 | Inf | 3.19E-09    |

|            |     |             |
|------------|-----|-------------|
| AT4TE15745 | Inf | 8.70E-08    |
| AT4TE15750 | Inf | 2.88E-18    |
| AT4TE15755 | Inf | 9.33E-15    |
| AT4TE15835 | Inf | 2.98E-67    |
| AT4TE15890 | Inf | 6.92E-42    |
| AT4TE15915 | Inf | 0.000880857 |
| AT4TE15940 | Inf | 2.61E-22    |
| AT4TE16150 | Inf | 6.51E-10    |
| AT4TE16165 | Inf | 1.49E-09    |
| AT4TE16175 | Inf | 2.86E-16    |
| AT4TE16210 | Inf | 0.003957773 |
| AT4TE16230 | Inf | 1.25E-18    |
| AT4TE16235 | Inf | 6.01E-06    |
| AT4TE16385 | Inf | 1.41E-23    |
| AT4TE16390 | Inf | 3.06E-53    |
| AT4TE16480 | Inf | 0.001288085 |
| AT4TE16510 | Inf | 2.86E-09    |
| AT4TE16560 | Inf | 0.001362457 |
| AT4TE16565 | Inf | 1.78E-65    |
| AT4TE16570 | Inf | 1.72E-17    |
| AT4TE16600 | Inf | 0.04195819  |
| AT4TE16750 | Inf | 3.19E-08    |
| AT4TE16845 | Inf | 1.34E-08    |
| AT4TE16870 | Inf | 1.26E-09    |
| AT4TE16980 | Inf | 3.57E-05    |
| AT4TE17065 | Inf | 0.000411109 |
| AT4TE17075 | Inf | 0.000339023 |
| AT4TE17185 | Inf | 0.02900024  |
| AT4TE17240 | Inf | 8.49E-15    |
| AT4TE17505 | Inf | 4.57E-05    |
| AT4TE17510 | Inf | 5.42E-46    |
| AT4TE17520 | Inf | 3.38E-06    |
| AT4TE17925 | Inf | 7.89E-07    |
| AT4TE18065 | Inf | 0.02996119  |
| AT4TE18075 | Inf | 0.018474139 |
| AT4TE18205 | Inf | 6.32E-09    |
| AT4TE18330 | Inf | 2.86E-21    |
| AT4TE18355 | Inf | 0.001814641 |
| AT4TE18365 | Inf | 5.24E-18    |
| AT4TE18440 | Inf | 3.31E-44    |
| AT4TE18500 | Inf | 3.00E-15    |
| AT4TE18505 | Inf | 1.58E-06    |
| AT4TE18595 | Inf | 5.73E-21    |
| AT4TE18615 | Inf | 1.88E-22    |
| AT4TE18630 | Inf | 2.68E-37    |
| AT4TE18645 | Inf | 5.46E-17    |
| AT4TE18665 | Inf | 1.26E-42    |
| AT4TE18775 | Inf | 0.003023144 |
| AT4TE18865 | Inf | 5.35E-07    |

|            |     |             |
|------------|-----|-------------|
| AT4TE18995 | Inf | 0.000221806 |
| AT4TE19135 | Inf | 6.80E-13    |
| AT4TE19380 | Inf | 0.003088244 |
| AT4TE19405 | Inf | 7.47E-16    |
| AT4TE19530 | Inf | 3.90E-06    |
| AT4TE19655 | Inf | 5.60E-09    |
| AT4TE19780 | Inf | 2.23E-06    |
| AT4TE19825 | Inf | 0.023386641 |
| AT4TE19830 | Inf | 0.027005417 |
| AT4TE19850 | Inf | 0.001087867 |
| AT4TE19885 | Inf | 0.004639846 |
| AT4TE19905 | Inf | 4.02E-11    |
| AT4TE20085 | Inf | 3.62E-06    |
| AT4TE20385 | Inf | 5.44E-07    |
| AT4TE20805 | Inf | 1.54E-06    |
| AT4TE20920 | Inf | 0.001966458 |
| AT4TE20930 | Inf | 0.017844217 |
| AT4TE20975 | Inf | 0.000708751 |
| AT4TE21140 | Inf | 5.12E-06    |
| AT4TE21180 | Inf | 3.44E-29    |
| AT4TE21185 | Inf | 7.05E-08    |
| AT4TE21520 | Inf | 0.024937434 |
| AT4TE22970 | Inf | 1.13E-36    |
| AT4TE23195 | Inf | 0.020254799 |
| AT4TE23425 | Inf | 1.55E-11    |
| AT4TE23825 | Inf | 2.67E-25    |
| AT4TE24480 | Inf | 0.004068059 |
| AT4TE24720 | Inf | 0.049195064 |
| AT4TE24825 | Inf | 0.001894793 |
| AT4TE25025 | Inf | 6.49E-09    |
| AT4TE25590 | Inf | 1.06E-10    |
| AT4TE28870 | Inf | 1.08E-06    |
| AT4TE39815 | Inf | 7.69E-37    |
| AT4TE40115 | Inf | 0.000676168 |
| AT4TE44395 | Inf | 2.15E-10    |
| AT4TE44400 | Inf | 0.000274865 |
| AT4TE45190 | Inf | 3.58E-23    |
| AT4TE46310 | Inf | 2.52E-40    |
| AT4TE47620 | Inf | 0.000169301 |
| AT4TE54700 | Inf | 5.28E-11    |
| AT4TE80960 | Inf | 0.020696902 |
| AT5G01080  | Inf | 1.37E-51    |
| AT5G06500  | Inf | 0.047418312 |
| AT5G07570  | Inf | 4.23E-07    |
| AT5G15420  | Inf | 7.10E-17    |
| AT5G24480  | Inf | 9.35E-61    |
| AT5G26840  | Inf | 0.002093497 |
| AT5G27340  | Inf | 4.79E-05    |
| AT5G28052  | Inf | 3.91E-22    |



|            |     |             |
|------------|-----|-------------|
| AT5G28090  | Inf | 1.17E-11    |
| AT5G28560  | Inf | 1.35E-16    |
| AT5G28780  | Inf | 0.004726712 |
| AT5G28800  | Inf | 4.30E-29    |
| AT5G28823  | Inf | 2.33E-27    |
| AT5G28824  | Inf | 2.21E-44    |
| AT5G29807  | Inf | 3.97E-09    |
| AT5G30420  | Inf | 1.64E-31    |
| AT5G32471  | Inf | 1.53E-23    |
| AT5G32613  | Inf | 6.12E-27    |
| AT5G33210  | Inf | 4.37E-05    |
| AT5G33258  | Inf | 3.29E-05    |
| AT5G33310  | Inf | 3.86E-55    |
| AT5G33806  | Inf | 7.60E-13    |
| AT5G33898  | Inf | 0.000138576 |
| AT5G34581  | Inf | 0.030102264 |
| AT5G34832  | Inf | 0.00073143  |
| AT5G34848  | Inf | 0.000541795 |
| AT5G35050  | Inf | 0.000311519 |
| AT5G35120  | Inf | 3.43E-10    |
| AT5G35375  | Inf | 8.25E-40    |
| AT5G35603  | Inf | 3.18E-17    |
| AT5G35796  | Inf | 0.041632579 |
| AT5G35890  | Inf | 2.21E-30    |
| AT5G35932  | Inf | 5.59E-18    |
| AT5G36228  | Inf | 9.08E-18    |
| AT5G40430  | Inf | 2.25E-05    |
| AT5G48860  | Inf | 2.21E-07    |
| AT5G60560  | Inf | 4.59E-05    |
| AT5TE00230 | Inf | 7.21E-46    |
| AT5TE08220 | Inf | 1.00E-08    |
| AT5TE08870 | Inf | 0.000103212 |
| AT5TE14165 | Inf | 0.001391367 |
| AT5TE15640 | Inf | 6.09E-43    |
| AT5TE15645 | Inf | 0.001894793 |
| AT5TE18895 | Inf | 3.85E-19    |
| AT5TE18900 | Inf | 6.28E-09    |
| AT5TE26805 | Inf | 1.86E-22    |
| AT5TE29520 | Inf | 0.01459263  |
| AT5TE32880 | Inf | 2.39E-05    |
| AT5TE34435 | Inf | 2.43E-13    |
| AT5TE34730 | Inf | 1.87E-49    |
| AT5TE34960 | Inf | 8.61E-23    |
| AT5TE35185 | Inf | 4.42E-29    |
| AT5TE35205 | Inf | 0.003996378 |
| AT5TE35260 | Inf | 4.40E-24    |
| AT5TE35265 | Inf | 2.39E-50    |
| AT5TE35705 | Inf | 0.017289499 |
| AT5TE36235 | Inf | 1.55E-16    |

|            |     |             |
|------------|-----|-------------|
| AT5TE36330 | Inf | 1.18E-06    |
| AT5TE36335 | Inf | 4.09E-26    |
| AT5TE36620 | Inf | 2.67E-16    |
| AT5TE36720 | Inf | 9.52E-10    |
| AT5TE36725 | Inf | 1.36E-05    |
| AT5TE36730 | Inf | 9.91E-05    |
| AT5TE36735 | Inf | 0.002554323 |
| AT5TE36805 | Inf | 3.13E-12    |
| AT5TE36825 | Inf | 1.43E-15    |
| AT5TE36840 | Inf | 0.005259492 |
| AT5TE36845 | Inf | 2.04E-10    |
| AT5TE36975 | Inf | 0.000188028 |
| AT5TE37665 | Inf | 4.52E-19    |
| AT5TE37825 | Inf | 3.63E-13    |
| AT5TE38025 | Inf | 5.37E-05    |
| AT5TE38070 | Inf | 0.04975822  |
| AT5TE38280 | Inf | 6.56E-07    |
| AT5TE38350 | Inf | 2.18E-06    |
| AT5TE38370 | Inf | 0.014114309 |
| AT5TE38615 | Inf | 4.29E-49    |
| AT5TE38635 | Inf | 0.000644714 |
| AT5TE38650 | Inf | 9.57E-05    |
| AT5TE38945 | Inf | 2.79E-12    |
| AT5TE38995 | Inf | 0.009078392 |
| AT5TE39045 | Inf | 3.01E-10    |
| AT5TE39085 | Inf | 2.19E-11    |
| AT5TE39090 | Inf | 2.69E-39    |
| AT5TE39105 | Inf | 0.029193864 |
| AT5TE39275 | Inf | 5.52E-07    |
| AT5TE39320 | Inf | 4.97E-19    |
| AT5TE39415 | Inf | 8.96E-11    |
| AT5TE39420 | Inf | 8.79E-14    |
| AT5TE39560 | Inf | 6.34E-06    |
| AT5TE39850 | Inf | 2.14E-22    |
| AT5TE40085 | Inf | 0.001005739 |
| AT5TE40105 | Inf | 0.015097645 |
| AT5TE40120 | Inf | 0.007383226 |
| AT5TE40130 | Inf | 2.90E-07    |
| AT5TE40195 | Inf | 1.38E-05    |
| AT5TE40235 | Inf | 0.005771326 |
| AT5TE40310 | Inf | 1.88E-15    |
| AT5TE40380 | Inf | 3.11E-05    |
| AT5TE40410 | Inf | 0.015120035 |
| AT5TE40505 | Inf | 1.22E-23    |
| AT5TE40520 | Inf | 7.09E-07    |
| AT5TE40530 | Inf | 0.001271277 |
| AT5TE40570 | Inf | 0.014617441 |
| AT5TE40580 | Inf | 3.82E-10    |
| AT5TE40835 | Inf | 1.19E-10    |

|            |     |             |
|------------|-----|-------------|
| AT5TE41090 | Inf | 0.002387567 |
| AT5TE41135 | Inf | 2.22E-06    |
| AT5TE41185 | Inf | 3.30E-07    |
| AT5TE41265 | Inf | 2.62E-36    |
| AT5TE41270 | Inf | 1.89E-17    |
| AT5TE41315 | Inf | 1.07E-14    |
| AT5TE41320 | Inf | 1.73E-05    |
| AT5TE41325 | Inf | 1.31E-08    |
| AT5TE41355 | Inf | 8.80E-06    |
| AT5TE41360 | Inf | 5.21E-05    |
| AT5TE41395 | Inf | 0.010354552 |
| AT5TE41550 | Inf | 0.009425748 |
| AT5TE41600 | Inf | 4.18E-11    |
| AT5TE41610 | Inf | 0.00023171  |
| AT5TE41615 | Inf | 9.25E-17    |
| AT5TE41780 | Inf | 0.015568409 |
| AT5TE41825 | Inf | 0.004231014 |
| AT5TE42030 | Inf | 0.007012591 |
| AT5TE42040 | Inf | 5.80E-05    |
| AT5TE42190 | Inf | 0.000404459 |
| AT5TE42250 | Inf | 1.28E-16    |
| AT5TE42265 | Inf | 2.81E-23    |
| AT5TE42345 | Inf | 5.05E-17    |
| AT5TE42680 | Inf | 1.56E-17    |
| AT5TE42855 | Inf | 2.17E-09    |
| AT5TE42865 | Inf | 8.04E-23    |
| AT5TE42900 | Inf | 3.66E-33    |
| AT5TE42915 | Inf | 1.25E-06    |
| AT5TE42930 | Inf | 1.08E-05    |
| AT5TE42935 | Inf | 0.039477127 |
| AT5TE42985 | Inf | 1.41E-06    |
| AT5TE43045 | Inf | 3.89E-05    |
| AT5TE43060 | Inf | 1.02E-40    |
| AT5TE43075 | Inf | 8.96E-32    |
| AT5TE43190 | Inf | 9.44E-41    |
| AT5TE43205 | Inf | 2.00E-13    |
| AT5TE43215 | Inf | 1.66E-45    |
| AT5TE43240 | Inf | 2.22E-30    |
| AT5TE43255 | Inf | 2.11E-32    |
| AT5TE43290 | Inf | 0.003106567 |
| AT5TE43300 | Inf | 4.64E-05    |
| AT5TE43310 | Inf | 0.007909472 |
| AT5TE43315 | Inf | 5.01E-16    |
| AT5TE43350 | Inf | 1.76E-14    |
| AT5TE43365 | Inf | 3.43E-05    |
| AT5TE43375 | Inf | 4.44E-25    |
| AT5TE43400 | Inf | 1.83E-08    |
| AT5TE43520 | Inf | 4.17E-09    |
| AT5TE43575 | Inf | 4.84E-18    |

|            |     |             |
|------------|-----|-------------|
| AT5TE43630 | Inf | 3.29E-09    |
| AT5TE43635 | Inf | 2.87E-18    |
| AT5TE43765 | Inf | 2.13E-07    |
| AT5TE43785 | Inf | 0.014675943 |
| AT5TE43800 | Inf | 7.29E-38    |
| AT5TE43825 | Inf | 2.68E-31    |
| AT5TE43905 | Inf | 8.34E-11    |
| AT5TE43990 | Inf | 2.55E-07    |
| AT5TE44070 | Inf | 9.62E-09    |
| AT5TE44110 | Inf | 2.87E-06    |
| AT5TE44205 | Inf | 6.18E-05    |
| AT5TE44255 | Inf | 9.99E-07    |
| AT5TE44360 | Inf | 0.000485039 |
| AT5TE44370 | Inf | 7.00E-07    |
| AT5TE44380 | Inf | 0.03529703  |
| AT5TE44555 | Inf | 6.53E-05    |
| AT5TE44745 | Inf | 0.005551147 |
| AT5TE44750 | Inf | 4.62E-10    |
| AT5TE44895 | Inf | 0.011738905 |
| AT5TE44940 | Inf | 1.50E-06    |
| AT5TE44960 | Inf | 1.92E-09    |
| AT5TE45000 | Inf | 1.61E-13    |
| AT5TE45020 | Inf | 5.23E-10    |
| AT5TE45055 | Inf | 8.71E-09    |
| AT5TE45060 | Inf | 5.75E-11    |
| AT5TE45065 | Inf | 4.38E-10    |
| AT5TE45080 | Inf | 6.99E-12    |
| AT5TE45090 | Inf | 6.76E-07    |
| AT5TE45100 | Inf | 0.00399627  |
| AT5TE45115 | Inf | 8.18E-05    |
| AT5TE45125 | Inf | 0.030770144 |
| AT5TE45895 | Inf | 3.43E-15    |
| AT5TE45905 | Inf | 4.13E-17    |
| AT5TE46040 | Inf | 3.11E-13    |
| AT5TE46045 | Inf | 3.95E-11    |
| AT5TE46100 | Inf | 5.16E-12    |
| AT5TE46120 | Inf | 6.48E-08    |
| AT5TE46160 | Inf | 1.29E-15    |
| AT5TE46235 | Inf | 1.79E-15    |
| AT5TE46250 | Inf | 0.008353326 |
| AT5TE46255 | Inf | 0.012445025 |
| AT5TE46310 | Inf | 0.023841505 |
| AT5TE46355 | Inf | 0.002893694 |
| AT5TE46440 | Inf | 0.000623893 |
| AT5TE46515 | Inf | 5.19E-08    |
| AT5TE46815 | Inf | 0.00684887  |
| AT5TE46850 | Inf | 1.13E-07    |
| AT5TE46910 | Inf | 1.04E-48    |
| AT5TE46970 | Inf | 0.004054371 |

|            |     |             |
|------------|-----|-------------|
| AT5TE47115 | Inf | 4.46E-22    |
| AT5TE47155 | Inf | 6.91E-22    |
| AT5TE47395 | Inf | 2.95E-06    |
| AT5TE47475 | Inf | 0.000258994 |
| AT5TE47505 | Inf | 3.93E-20    |
| AT5TE47520 | Inf | 2.10E-20    |
| AT5TE47990 | Inf | 0.023744742 |
| AT5TE48195 | Inf | 5.47E-22    |
| AT5TE49130 | Inf | 9.59E-27    |
| AT5TE49765 | Inf | 1.43E-06    |
| AT5TE50115 | Inf | 7.10E-06    |
| AT5TE50150 | Inf | 1.35E-14    |
| AT5TE50490 | Inf | 0.009974774 |
| AT5TE50960 | Inf | 1.01E-58    |
| AT5TE50990 | Inf | 0.003502525 |
| AT5TE50995 | Inf | 0.000545829 |
| AT5TE51000 | Inf | 2.08E-18    |
| AT5TE52345 | Inf | 3.45E-10    |
| AT5TE52795 | Inf | 8.75E-08    |
| AT5TE52845 | Inf | 2.76E-36    |
| AT5TE54505 | Inf | 1.40E-08    |
| AT5TE54510 | Inf | 1.33E-38    |
| AT5TE54515 | Inf | 9.86E-22    |
| AT5TE54520 | Inf | 0.005765482 |
| AT5TE55925 | Inf | 1.56E-06    |
| AT5TE56030 | Inf | 0.002695486 |
| AT5TE57495 | Inf | 7.51E-34    |
| AT5TE57500 | Inf | 0.042004891 |
| AT5TE61740 | Inf | 3.98E-06    |
| AT5TE62545 | Inf | 5.20E-12    |
| AT5TE66505 | Inf | 9.96E-17    |
| AT5TE66550 | Inf | 0.001221307 |
| AT5TE68140 | Inf | 6.78E-05    |
| AT5TE72235 | Inf | 0.003441198 |
| AT5TE74320 | Inf | 1.00E-15    |
| AT5TE81385 | Inf | 6.70E-24    |
| AT5TE95120 | Inf | 5.17E-09    |

**Supplemental File 2.** Genes and TEs differentially expressed in *met1* vs wild type

| ID         | Log <sub>2</sub> fold change | Adjusted p-value |
|------------|------------------------------|------------------|
| AT2TE19275 | -Inf                         | 0.001436918      |
| AT4G32375  | -Inf                         | 0.012105398      |
| AT5G37430  | -Inf                         | 0.00428496       |
| AT5G42232  | -Inf                         | 0.000483552      |
| AT5G53990  | -Inf                         | 0.030620339      |
| AT5G58830  | -Inf                         | 0.011121878      |
| AT2TE22815 | -6.71026                     | 1.44E-06         |
| AT3G15950  | -6.09362                     | 5.12E-17         |
| AT3TE49325 | -5.41046                     | 0.002111005      |
| AT1G77880  | -5.3675                      | 4.82E-08         |
| AT2G29860  | -5.27882                     | 0.014324301      |
| AT1G49290  | -5.18954                     | 4.72E-13         |
| AT2G36490  | -5.09259                     | 6.39E-26         |
| AT5TE39035 | -5.06974                     | 0.014047497      |
| AT5G61680  | -5.05478                     | 0.000313067      |
| AT5G49180  | -4.85218                     | 4.96E-15         |
| AT1G34095  | -4.50257                     | 3.34E-09         |
| AT4G08991  | -4.50177                     | 0.025179143      |
| AT1G77870  | -4.47917                     | 2.72E-20         |
| AT1G23720  | -4.36973                     | 0.005065675      |
| AT5G16100  | -4.33303                     | 0.01235231       |
| AT2G45403  | -4.30488                     | 0.013687821      |
| AT5G02110  | -4.27283                     | 0.000480502      |
| AT4G33860  | -4.24997                     | 0.001780832      |
| AT5G25430  | -4.20295                     | 0.038440102      |
| AT4G35610  | -4.07242                     | 0.001123362      |
| AT4G21895  | -4.04726                     | 0.031499905      |
| AT5G35390  | -4.00693                     | 0.007801814      |
| AT4G35700  | -3.99054                     | 0.001050474      |
| AT1G75870  | -3.97732                     | 0.030518992      |
| AT3G46850  | -3.95327                     | 0.031499905      |
| AT1G80470  | -3.94312                     | 0.001016983      |
| AT4G06701  | -3.87979                     | 4.85E-07         |
| AT4TE30225 | -3.83556                     | 0.012342475      |
| AT4G16892  | -3.80516                     | 3.87E-06         |
| AT4TE10320 | -3.78466                     | 1.98E-08         |
| AT2G13960  | -3.76479                     | 0.023999194      |
| AT3G62230  | -3.72938                     | 0.023527442      |
| AT2TE84980 | -3.72474                     | 5.91E-06         |
| AT3G25810  | -3.70115                     | 1.08E-09         |
| AT3G44920  | -3.64957                     | 0.000318108      |
| AT1G49790  | -3.63842                     | 0.00039297       |
| AT3G42473  | -3.63339                     | 0.000232233      |
| AT4G05310  | -3.62238                     | 6.06E-05         |
| AT5G12960  | -3.46998                     | 0.000530285      |
| AT4G00380  | -3.39068                     | 1.19E-09         |

|            |          |             |
|------------|----------|-------------|
| AT5G48140  | -3.36807 | 0.003188366 |
| AT5TE37200 | -3.33305 | 0.0232456   |
| AT1G47840  | -3.32259 | 7.59E-06    |
| AT2G35250  | -3.28042 | 0.042683389 |
| AT2G15128  | -3.25495 | 0.000205274 |
| AT4TE42860 | -3.2437  | 1.04E-05    |
| AT5G20390  | -3.24331 | 0.042225782 |
| AT1G23940  | -3.24    | 9.39E-10    |
| AT5G45150  | -3.20471 | 2.14E-07    |
| AT1G02952  | -3.17387 | 4.33E-05    |
| AT3G52000  | -3.15195 | 0.041549935 |
| AT5G49070  | -3.1314  | 4.45E-13    |
| AT1G01980  | -3.11285 | 0.009454629 |
| AT1G15850  | -3.07469 | 0.007208104 |
| AT3G47410  | -3.05467 | 6.74E-05    |
| AT1G23935  | -3.03305 | 0.001173009 |
| AT3G09260  | -3.02898 | 0.002529425 |
| AT4TE21095 | -2.98765 | 0.025627286 |
| AT2G27315  | -2.97114 | 0.001351196 |
| AT4G03610  | -2.96805 | 0.024519774 |
| AT4TE42950 | -2.9433  | 1.02E-08    |
| AT4G10060  | -2.93752 | 3.93E-10    |
| AT1G60410  | -2.91161 | 0.003635371 |
| AT3G44250  | -2.8949  | 4.35E-07    |
| AT4G13495  | -2.88861 | 1.02E-05    |
| AT4G35280  | -2.85702 | 0.004964256 |
| AT3TE45620 | -2.85625 | 0.001972536 |
| AT1G52000  | -2.81365 | 1.43E-08    |
| AT2G17430  | -2.8133  | 0.000784168 |
| AT4G10265  | -2.80495 | 0.001373752 |
| AT4G30590  | -2.786   | 0.000618219 |
| AT1G16410  | -2.77534 | 0.037114782 |
| AT1G08140  | -2.75592 | 0.03203689  |
| AT3G21310  | -2.73886 | 7.51E-10    |
| AT3G28810  | -2.73665 | 0.022121825 |
| AT1G26795  | -2.69021 | 0.033915464 |
| AT5G53810  | -2.65875 | 0.001721841 |
| AT3G46490  | -2.6051  | 0.008971937 |
| AT3G50310  | -2.60122 | 0.00034485  |
| AT2G27145  | -2.59098 | 0.010490432 |
| AT5G37420  | -2.55495 | 1.14E-06    |
| AT3TE65375 | -2.53972 | 1.86E-05    |
| AT2G14378  | -2.53304 | 0.018983483 |
| AT2G12170  | -2.52774 | 8.17E-06    |
| AT3G19710  | -2.52459 | 0.019999841 |
| AT4G15100  | -2.51311 | 0.006286231 |
| AT5G42170  | -2.50443 | 0.016156565 |
| AT3G55870  | -2.47675 | 0.001449543 |
| AT5G23010  | -2.46763 | 4.67E-11    |

|            |          |             |
|------------|----------|-------------|
| AT3G16460  | -2.46724 | 4.68E-07    |
| AT5TE48460 | -2.42015 | 0.031040782 |
| AT5TE61030 | -2.41221 | 0.010976417 |
| AT3G20940  | -2.3646  | 0.000208987 |
| AT3G52535  | -2.35014 | 4.65E-05    |
| AT4G13985  | -2.33205 | 0.024034425 |
| AT3G03190  | -2.31812 | 0.00195638  |
| AT2G20070  | -2.30087 | 0.039663854 |
| AT5G52975  | -2.2757  | 0.011111917 |
| AT4G36490  | -2.26159 | 0.042993795 |
| AT4G13190  | -2.25601 | 0.003018647 |
| AT4G03935  | -2.21549 | 7.19E-05    |
| AT5G12380  | -2.21507 | 0.044508723 |
| AT1G48953  | -2.21253 | 0.015700798 |
| AT3G59960  | -2.18232 | 0.019527874 |
| AT4G37860  | -2.15579 | 0.030864939 |
| AT5G23160  | -2.14794 | 0.04457351  |
| AT1G78990  | -2.14486 | 0.041376919 |
| AT5G60010  | -2.14252 | 0.012342475 |
| AT5G18910  | -2.14107 | 0.033940235 |
| AT5G24316  | -2.13523 | 0.01202954  |
| AT2G17845  | -2.13077 | 0.024320958 |
| AT3G45060  | -2.11982 | 0.00195638  |
| AT5G08240  | -2.11349 | 0.001201168 |
| AT3G62670  | -2.11318 | 0.043931617 |
| AT5G49850  | -2.10007 | 0.000703684 |
| AT5G03552  | -2.09818 | 0.047169746 |
| AT4G32170  | -2.09387 | 0.003493977 |
| AT3G10470  | -2.07277 | 0.025586911 |
| AT5G47000  | -2.0685  | 0.023466274 |
| AT3G26520  | -2.06394 | 6.73E-05    |
| AT2G03110  | -2.06378 | 0.001832443 |
| AT1G73177  | -2.06297 | 5.73E-06    |
| AT4G36470  | -2.06135 | 0.000281865 |
| AT5G03668  | -2.02908 | 0.018616669 |
| AT2G25150  | -2.02191 | 0.005521375 |
| AT4G29880  | -2.01206 | 0.013887909 |
| AT2G40990  | -1.99432 | 0.047382418 |
| AT5G16500  | -1.9875  | 0.041841366 |
| AT1G47760  | -1.98455 | 0.016734112 |
| AT1G18140  | -1.96082 | 5.97E-07    |
| AT2G24210  | -1.93809 | 0.045407043 |
| AT4G14570  | -1.93517 | 1.31E-06    |
| AT3G17150  | -1.91306 | 0.009087308 |
| AT4G01930  | -1.90716 | 0.005113971 |
| AT1G34460  | -1.89604 | 0.004467528 |
| AT3G42640  | -1.8843  | 0.006982956 |
| AT2G26490  | -1.88054 | 0.047146969 |
| AT5G13370  | -1.87174 | 0.001714361 |



|           |          |             |
|-----------|----------|-------------|
| AT3G54830 | -1.84457 | 0.000890732 |
| AT5G42280 | -1.84453 | 1.97E-06    |
| AT4G09190 | -1.82784 | 0.047830705 |
| AT5G55490 | -1.82691 | 0.039199636 |
| AT5G38140 | -1.8045  | 0.001368334 |
| AT3G50390 | -1.78192 | 0.010752935 |
| AT3G24620 | -1.76423 | 0.046927371 |
| AT3G32940 | -1.72745 | 1.53E-06    |
| AT1G64235 | -1.72091 | 0.043644863 |
| AT5G27600 | -1.70767 | 1.22E-05    |
| AT3G05820 | -1.70699 | 0.038413409 |
| AT3G16320 | -1.69884 | 0.000217144 |
| AT5G64510 | -1.69267 | 0.025702478 |
| AT3G12660 | -1.68751 | 0.038864561 |
| AT1G76830 | -1.68441 | 0.046073068 |
| AT5G45730 | -1.67523 | 0.002529425 |
| AT1G58370 | -1.66372 | 1.86E-05    |
| AT2G36500 | -1.64238 | 0.000804988 |
| AT4G27570 | -1.63864 | 2.35E-05    |
| AT4G15650 | -1.63807 | 0.02774962  |
| AT1G74830 | -1.63435 | 0.038805401 |
| AT5G38710 | -1.62876 | 3.93E-05    |
| AT5G47140 | -1.62492 | 0.001623697 |
| AT5G37060 | -1.62257 | 0.044927779 |
| AT3G03855 | -1.5986  | 0.042610695 |
| AT5G07170 | -1.5979  | 0.037671819 |
| AT1G26310 | -1.59626 | 0.00016758  |
| AT3G54770 | -1.59399 | 0.044927779 |
| AT2G18130 | -1.58062 | 8.75E-06    |
| AT3G47580 | -1.57934 | 0.008786511 |
| AT2G29710 | -1.57268 | 0.003203364 |
| AT1G78995 | -1.5669  | 0.041421356 |
| AT3G30180 | -1.56141 | 0.000121844 |
| AT5G51105 | -1.55907 | 0.01549064  |
| AT2G42170 | -1.54963 | 0.002111155 |
| AT2G17036 | -1.54517 | 0.013980884 |
| AT4G15233 | -1.52917 | 0.001226997 |
| AT2G15400 | -1.521   | 0.000737876 |
| AT5G07860 | -1.51479 | 0.000419687 |
| AT5G38150 | -1.508   | 0.035372211 |
| AT5G35450 | -1.50205 | 0.003590274 |
| AT3G28200 | -1.50107 | 0.029685349 |
| AT5G19610 | -1.5002  | 0.041313725 |
| AT3G28820 | -1.48192 | 0.048089315 |
| AT1G67550 | -1.48187 | 0.000552847 |
| AT3G25050 | -1.4792  | 4.78E-05    |
| AT5G60142 | -1.46431 | 0.003744231 |
| AT3G23880 | -1.46277 | 0.009686821 |
| AT1G62770 | -1.46231 | 0.004552036 |

|            |          |             |
|------------|----------|-------------|
| AT1G04890  | -1.4617  | 0.008004375 |
| AT4G13700  | -1.45962 | 0.004098155 |
| AT2G31830  | -1.44984 | 0.000125138 |
| AT2G14520  | -1.44496 | 0.002131512 |
| AT2G04110  | -1.44418 | 0.002963317 |
| AT1G57620  | -1.44037 | 0.000356099 |
| AT1G72890  | -1.43358 | 0.026672206 |
| AT3G54600  | -1.43317 | 0.000567214 |
| AT3G23480  | -1.42986 | 0.008474451 |
| AT3G47800  | -1.42279 | 0.025586911 |
| AT2TE12510 | -1.41166 | 0.000114747 |
| AT3G59830  | -1.40916 | 0.040831268 |
| AT2G41470  | -1.39303 | 0.003593901 |
| AT1TE57805 | -1.39185 | 0.00221511  |
| AT5G39865  | -1.38969 | 0.025005059 |
| AT3G28950  | -1.38758 | 0.018081226 |
| AT2G21720  | -1.38574 | 0.005784922 |
| AT5G27490  | -1.3845  | 0.000696827 |
| AT2TE34410 | -1.38146 | 0.043246299 |
| AT3G57140  | -1.37653 | 0.038094537 |
| AT2G40180  | -1.37207 | 0.039403921 |
| AT1G48490  | -1.3717  | 0.000609764 |
| AT4G01920  | -1.36818 | 0.034191492 |
| AT1G53330  | -1.3665  | 0.04321397  |
| AT5G49900  | -1.35804 | 0.000238224 |
| AT1G26945  | -1.34726 | 0.00235029  |
| AT5G51790  | -1.34117 | 0.020412865 |
| AT1G03550  | -1.33793 | 0.002080804 |
| AT5G17165  | -1.33559 | 0.012168438 |
| AT3G22750  | -1.32665 | 0.044582419 |
| AT2TE12605 | -1.32607 | 0.039590523 |
| AT2G24190  | -1.3227  | 0.026354811 |
| AT3G42670  | -1.31911 | 0.037000201 |
| AT3G07610  | -1.30953 | 0.003072595 |
| AT1G18750  | -1.30794 | 0.002972116 |
| AT3G24360  | -1.30744 | 0.001548291 |
| AT5G34930  | -1.306   | 0.007180065 |
| AT5G13670  | -1.30518 | 0.001417502 |
| AT1G75910  | -1.29376 | 0.001639058 |
| AT2G34620  | -1.29254 | 0.002384746 |
| AT4G15730  | -1.29122 | 0.007537111 |
| AT3G03800  | -1.28243 | 0.003022127 |
| AT5G38120  | -1.26831 | 0.00533333  |
| AT5G04360  | -1.26285 | 0.032556404 |
| AT5G39350  | -1.2593  | 0.011595276 |
| AT5G57130  | -1.2535  | 0.048723714 |
| AT5G43403  | -1.24562 | 0.019886581 |
| AT4G08510  | -1.24518 | 0.041841366 |
| AT4G36540  | -1.2409  | 0.001715359 |

|            |          |             |
|------------|----------|-------------|
| AT5G24770  | -1.24035 | 0.029695223 |
| AT5G51810  | -1.2344  | 0.008540492 |
| AT3G21770  | -1.22072 | 0.03317309  |
| AT2G22960  | -1.21296 | 0.016734112 |
| AT1G15210  | -1.212   | 0.043016671 |
| AT5G52340  | -1.20429 | 0.008470993 |
| AT2G32510  | -1.19689 | 0.00808843  |
| AT5G49680  | -1.19068 | 0.000722757 |
| AT1G54280  | -1.18795 | 0.036958286 |
| AT5G12100  | -1.1876  | 0.008333653 |
| AT3TE61420 | -1.18718 | 0.024333477 |
| AT3G43600  | -1.1838  | 0.031829783 |
| AT5G26210  | -1.18203 | 0.006004184 |
| AT3G02310  | -1.1805  | 0.001488091 |
| AT5G46540  | -1.16349 | 0.047322616 |
| AT2G36890  | -1.16194 | 0.004611082 |
| AT2G10931  | -1.15613 | 0.030759496 |
| AT5G14150  | -1.15591 | 0.017284111 |
| AT5G01180  | -1.1525  | 0.014186699 |
| AT2G41210  | -1.14525 | 0.006972055 |
| AT2G03710  | -1.1391  | 0.020172249 |
| AT2G18420  | -1.13117 | 0.007235896 |
| AT1G38131  | -1.131   | 0.038983933 |
| AT1G43245  | -1.11353 | 0.019121884 |
| AT2G40030  | -1.10798 | 0.02085809  |
| AT2G12400  | -1.09611 | 0.006295331 |
| AT3G54700  | -1.0928  | 0.031987751 |
| AT5G17340  | -1.08904 | 0.037271648 |
| AT4G32500  | -1.08345 | 0.010982406 |
| AT5G50950  | -1.0682  | 0.022447916 |
| AT5G15960  | -1.06763 | 0.017314502 |
| AT2G29340  | -1.06738 | 0.038414808 |
| AT1G49500  | -1.06443 | 0.020435802 |
| AT3G47660  | -1.06353 | 0.047529378 |
| AT4G32460  | -1.06111 | 0.02019418  |
| AT1G77680  | -1.05067 | 0.041014182 |
| AT2G39850  | -1.04332 | 0.020896264 |
| AT1G54450  | -1.03414 | 0.005014708 |
| AT2G23170  | -1.02833 | 0.013687821 |
| AT1G74740  | -1.02663 | 0.036632223 |
| AT1G59640  | -1.02406 | 0.010449205 |
| AT2G40610  | -1.01307 | 0.04993649  |
| AT5G45720  | -1.01046 | 0.043478505 |
| AT2G19500  | -0.99933 | 0.021040988 |
| AT1G75940  | -0.9793  | 0.049159114 |
| AT2G03850  | -0.95773 | 0.049567767 |
| AT2G27880  | -0.95761 | 0.029087069 |
| AT2G45290  | -0.92375 | 0.01978365  |
| AT5G39760  | -0.92316 | 0.035284566 |

|            |          |             |
|------------|----------|-------------|
| AT1G75930  | -0.9156  | 0.041896112 |
| AT5G21150  | -0.90705 | 0.029645343 |
| AT4G17260  | -0.90435 | 0.025083623 |
| AT1G23240  | -0.89157 | 0.025179143 |
| AT4G33355  | -0.88774 | 0.036248934 |
| AT3G27870  | 0.88924  | 0.038934644 |
| AT1G45191  | 0.91171  | 0.043367889 |
| AT5G58110  | 0.9357   | 0.038644817 |
| AT1G02850  | 0.95565  | 0.045616831 |
| AT1G66880  | 0.96521  | 0.045754484 |
| AT3G09910  | 0.99106  | 0.0239003   |
| AT3G18280  | 1.02772  | 0.032510013 |
| AT3G56080  | 1.02888  | 0.026101358 |
| AT5G02290  | 1.03054  | 0.036826545 |
| AT2G26170  | 1.03748  | 0.031594688 |
| AT3G05400  | 1.03852  | 0.040378353 |
| AT3G51440  | 1.05322  | 0.024696546 |
| AT5G16570  | 1.0574   | 0.041389345 |
| AT5G43500  | 1.0599   | 0.011549175 |
| AT4G35900  | 1.06738  | 0.006987592 |
| AT3G03170  | 1.07305  | 0.041667107 |
| AT3G53470  | 1.0934   | 0.010174783 |
| AT1G76100  | 1.09664  | 0.009940708 |
| AT1G03710  | 1.10975  | 0.02657344  |
| AT2G44290  | 1.12531  | 0.009391672 |
| AT2G33590  | 1.1422   | 0.039552073 |
| AT1G70250  | 1.14269  | 0.02130689  |
| AT1G54160  | 1.14313  | 0.011111917 |
| AT3G26450  | 1.15468  | 0.008121204 |
| AT3G23110  | 1.1614   | 0.026419515 |
| AT1G14520  | 1.17303  | 0.035645475 |
| AT3TE63065 | 1.17783  | 0.005292722 |
| AT1G56170  | 1.17961  | 0.014089603 |
| AT4G22305  | 1.18079  | 0.032902638 |
| AT1G07590  | 1.18123  | 0.005738325 |
| AT2G31880  | 1.22864  | 0.001938612 |
| AT1G33440  | 1.23229  | 0.018715213 |
| AT1G04425  | 1.24681  | 0.005527916 |
| AT3G25780  | 1.25064  | 0.04327813  |
| AT1G72130  | 1.25544  | 0.005570181 |
| AT3G53280  | 1.26001  | 0.013054488 |
| AT2G46430  | 1.26502  | 0.015321304 |
| AT5G16200  | 1.27325  | 0.01538602  |
| AT3G10720  | 1.27502  | 0.001891504 |
| AT4G14548  | 1.28969  | 0.030956398 |
| AT4G37780  | 1.29042  | 0.042849483 |
| AT1G76930  | 1.29848  | 0.031166494 |
| AT3G20460  | 1.30695  | 0.004978574 |
| AT2G40435  | 1.31014  | 0.008341316 |

|            |         |             |
|------------|---------|-------------|
| AT3G56200  | 1.31738 | 0.0381173   |
| AT5G13200  | 1.31831 | 0.028363959 |
| AT3G26742  | 1.3245  | 0.006950698 |
| AT2G39690  | 1.32775 | 0.022489288 |
| AT3G22880  | 1.33875 | 0.00053185  |
| AT4G23180  | 1.34388 | 0.003072117 |
| AT5G44570  | 1.3531  | 0.01839782  |
| AT3G58850  | 1.35937 | 0.038594588 |
| AT2G25625  | 1.36585 | 0.01220265  |
| AT2G41010  | 1.36737 | 0.014549117 |
| AT1G35530  | 1.36937 | 0.000315589 |
| AT5G57340  | 1.37255 | 0.008765732 |
| AT3G59080  | 1.37956 | 0.035580238 |
| AT1G67860  | 1.3967  | 0.004491722 |
| AT5G10695  | 1.40642 | 0.046823823 |
| AT2G21850  | 1.4066  | 0.003411814 |
| AT1G17830  | 1.40933 | 0.027708873 |
| AT3TE91745 | 1.41411 | 0.040764088 |
| AT2G41090  | 1.41822 | 0.011873276 |
| AT1G69310  | 1.41989 | 0.035604364 |
| AT3G05690  | 1.42658 | 0.018035228 |
| AT1G62540  | 1.42765 | 0.001381049 |
| AT1G13600  | 1.43024 | 0.022780317 |
| AT4G18740  | 1.45668 | 0.006279719 |
| AT3G01600  | 1.48337 | 0.014248634 |
| AT5G13190  | 1.48894 | 0.045736768 |
| AT4G13820  | 1.51427 | 0.046955368 |
| AT4G22690  | 1.52752 | 7.13E-05    |
| AT1G32690  | 1.52954 | 0.002551926 |
| AT5TE37815 | 1.53589 | 4.27E-05    |
| AT1G35230  | 1.55081 | 0.011323719 |
| AT4G35640  | 1.55368 | 0.039668081 |
| AT1G29660  | 1.56387 | 0.031095434 |
| AT3G54420  | 1.56453 | 0.04321397  |
| AT4G13180  | 1.56731 | 0.005956834 |
| AT1G23130  | 1.57669 | 0.027023233 |
| AT2G18150  | 1.57769 | 0.002010638 |
| AT5G25930  | 1.58503 | 0.030144681 |
| AT2G20570  | 1.59284 | 0.032943806 |
| AT5G60610  | 1.59712 | 0.001359199 |
| AT2G43620  | 1.60221 | 0.018146916 |
| AT3G10120  | 1.60983 | 0.038828775 |
| AT5G24530  | 1.60988 | 0.002048406 |
| AT4G30460  | 1.62629 | 0.004509477 |
| AT4G33930  | 1.62691 | 0.011226697 |
| AT1G14580  | 1.62709 | 7.77E-06    |
| AT3G14020  | 1.63695 | 0.000784168 |
| AT2G41120  | 1.64139 | 0.016105032 |
| AT3G28890  | 1.65129 | 0.047390657 |

|            |         |             |
|------------|---------|-------------|
| AT4G04490  | 1.66227 | 0.019974371 |
| AT5G59780  | 1.67859 | 0.000402413 |
| AT4G36500  | 1.68273 | 0.03840205  |
| AT1G01560  | 1.68417 | 0.043478505 |
| AT1G09500  | 1.68838 | 0.022555455 |
| AT1G11785  | 1.69192 | 0.037219461 |
| AT3G27400  | 1.69351 | 0.009940708 |
| AT5G38000  | 1.69441 | 0.00339126  |
| AT3G22600  | 1.69536 | 0.002356475 |
| AT2G27240  | 1.70483 | 0.018616669 |
| AT5G01540  | 1.7126  | 0.004611082 |
| AT3G57540  | 1.71613 | 0.03006897  |
| AT2G01960  | 1.71643 | 0.023123784 |
| AT2TE07550 | 1.71907 | 0.001369247 |
| AT3G47510  | 1.7238  | 0.002349347 |
| AT1G53490  | 1.73207 | 5.68E-06    |
| AT2G44080  | 1.73305 | 0.001664093 |
| AT5G42830  | 1.74479 | 0.001447757 |
| AT4G19030  | 1.75723 | 0.010071683 |
| AT3G51920  | 1.75895 | 0.004843732 |
| AT1G16730  | 1.78195 | 0.047985414 |
| AT3G59060  | 1.7921  | 8.30E-05    |
| AT4G38880  | 1.79275 | 0.034191492 |
| AT5TE50260 | 1.79305 | 0.003184293 |
| AT2TE10620 | 1.79591 | 0.001123362 |
| AT5G25470  | 1.7992  | 5.98E-05    |
| AT4G33050  | 1.80169 | 0.020881954 |
| AT5G13330  | 1.80822 | 0.014032907 |
| AT4G01700  | 1.81635 | 0.000114    |
| AT1G21520  | 1.81791 | 0.000123081 |
| AT3G22370  | 1.8181  | 8.73E-07    |
| AT4G10920  | 1.82579 | 7.87E-07    |
| AT4G20820  | 1.83875 | 0.015286012 |
| AT2G34280  | 1.84722 | 0.032085318 |
| AT1G14370  | 1.8576  | 0.014393672 |
| AT4G20970  | 1.87264 | 0.018657991 |
| AT1G71390  | 1.87624 | 0.006790242 |
| AT5TE18210 | 1.88817 | 0.002134569 |
| AT1G14870  | 1.90442 | 6.87E-05    |
| AT5TE36470 | 1.9096  | 0.008159226 |
| AT5G34780  | 1.91272 | 5.28E-05    |
| AT1G65845  | 1.92001 | 0.00632512  |
| AT4G30290  | 1.92888 | 0.022989565 |
| AT1G72060  | 1.94608 | 8.40E-05    |
| AT5G44580  | 1.97605 | 0.009879507 |
| AT4G16540  | 1.97912 | 0.001693586 |
| AT5G38386  | 1.98298 | 0.019491494 |
| AT1G48000  | 1.98319 | 0.010174783 |
| AT1G56710  | 1.98491 | 0.018779416 |

|            |         |             |
|------------|---------|-------------|
| AT3G61198  | 1.99327 | 0.00751236  |
| AT1TE42205 | 1.99618 | 0.004712229 |
| AT1G80820  | 2.00223 | 3.07E-05    |
| AT4TE13150 | 2.00532 | 0.00473197  |
| AT3G14210  | 2.02273 | 0.000901621 |
| AT4G00975  | 2.04053 | 0.01102519  |
| AT2G22470  | 2.04762 | 0.007549896 |
| AT5G48540  | 2.05073 | 0.01978803  |
| AT1G76960  | 2.05075 | 0.006100054 |
| AT3G26280  | 2.06698 | 0.000230611 |
| AT5G07760  | 2.07703 | 0.002603746 |
| AT5G43150  | 2.08277 | 0.004083568 |
| AT5G14565  | 2.08411 | 0.039946814 |
| AT3G09790  | 2.08482 | 0.017041017 |
| AT3G46900  | 2.08592 | 0.025179143 |
| AT3G43470  | 2.09634 | 0.011985387 |
| AT5G18270  | 2.10681 | 8.50E-05    |
| AT5G51440  | 2.12612 | 6.29E-06    |
| AT1G51800  | 2.13471 | 0.000488591 |
| AT3G22620  | 2.13745 | 0.0095454   |
| AT2G05642  | 2.14763 | 7.50E-05    |
| AT3G21710  | 2.1634  | 0.03392643  |
| AT3G27940  | 2.185   | 0.000154731 |
| AT3G26480  | 2.18978 | 6.61E-09    |
| AT5TE49725 | 2.19124 | 1.97E-05    |
| AT2G42180  | 2.1918  | 8.17E-05    |
| AT2G15042  | 2.1931  | 6.18E-06    |
| AT1G06830  | 2.19717 | 0.001730634 |
| AT1G67980  | 2.23079 | 0.008470993 |
| AT3G59190  | 2.23227 | 3.67E-07    |
| AT1G19420  | 2.2337  | 0.015493687 |
| AT1G56540  | 2.23628 | 0.000568071 |
| AT5G57010  | 2.23832 | 0.001557324 |
| AT1G49640  | 2.24197 | 0.041747825 |
| AT5G59310  | 2.25069 | 0.030518992 |
| AT2G35300  | 2.25847 | 0.000485844 |
| AT5TE39630 | 2.25937 | 7.86E-07    |
| AT4G38540  | 2.26117 | 0.007534687 |
| AT1G66780  | 2.2622  | 0.017850065 |
| AT2G32487  | 2.27645 | 0.026371352 |
| AT3G28210  | 2.28136 | 0.009140887 |
| AT2TE34910 | 2.2824  | 0.016609865 |
| AT3G08860  | 2.28241 | 2.97E-08    |
| AT1TE78470 | 2.3025  | 9.39E-06    |
| AT2G32210  | 2.31525 | 0.016127523 |
| AT3G26460  | 2.32837 | 0.033176708 |
| AT2G44460  | 2.33132 | 0.017859396 |
| AT3G04210  | 2.33757 | 0.006924652 |
| AT1G32225  | 2.34437 | 0.012078124 |

|            |         |             |
|------------|---------|-------------|
| AT4TE04415 | 2.34573 | 9.06E-10    |
| AT5TE33235 | 2.39384 | 0.004964256 |
| AT3G52400  | 2.44573 | 1.03E-05    |
| AT3G50480  | 2.46449 | 0.001552346 |
| AT1G21130  | 2.46982 | 0.000888362 |
| AT3G01960  | 2.48803 | 0.044616341 |
| AT2G43510  | 2.48888 | 0.004281269 |
| AT4G04830  | 2.49331 | 2.75E-10    |
| AT2G34655  | 2.52197 | 1.53E-12    |
| AT4G39830  | 2.52296 | 1.14E-05    |
| AT4TE27915 | 2.53237 | 0.002324576 |
| AT4G18250  | 2.54056 | 2.10E-05    |
| AT1G52690  | 2.55067 | 7.77E-09    |
| AT1G76952  | 2.55519 | 0.000169953 |
| AT1G75040  | 2.57145 | 9.35E-08    |
| AT2G15790  | 2.57652 | 5.67E-13    |
| AT4G14365  | 2.5841  | 0.014863628 |
| AT5G02330  | 2.58565 | 1.07E-08    |
| AT1TE53710 | 2.58992 | 0.013997105 |
| AT1TE53070 | 2.59129 | 0.004503824 |
| AT4G20690  | 2.60592 | 0.016692912 |
| AT5G19230  | 2.6168  | 6.83E-06    |
| AT1G45201  | 2.64451 | 2.33E-08    |
| AT1G73120  | 2.66286 | 0.046021794 |
| AT2TE09500 | 2.67864 | 0.00668872  |
| AT1TE34315 | 2.67998 | 0.036170851 |
| AT5G19240  | 2.68557 | 0.008721999 |
| AT1G61800  | 2.71994 | 0.009828082 |
| AT4TE06710 | 2.72623 | 1.43E-12    |
| AT4G31800  | 2.73562 | 0.036389632 |
| AT3G17690  | 2.73986 | 2.62E-08    |
| AT1G03810  | 2.74178 | 5.16E-06    |
| AT2G16050  | 2.74306 | 0.001774024 |
| AT3TE57780 | 2.76746 | 3.22E-13    |
| AT4G23220  | 2.77597 | 1.81E-08    |
| AT4G26350  | 2.77781 | 2.12E-05    |
| AT1G35710  | 2.7836  | 0.024761511 |
| AT3TE48540 | 2.79998 | 0.000221739 |
| AT1G12180  | 2.80367 | 0.026393332 |
| AT3G26470  | 2.80409 | 1.02E-05    |
| AT4TE18270 | 2.82699 | 0.047790459 |
| AT2G05995  | 2.83637 | 2.96E-07    |
| AT3G50770  | 2.84155 | 9.42E-09    |
| AT1G65510  | 2.88991 | 0.000432107 |
| AT2TE25020 | 2.92565 | 8.55E-06    |
| AT4G23230  | 2.92999 | 0.000246733 |
| AT4G11000  | 2.95251 | 0.034871089 |
| AT2TE10590 | 2.96478 | 0.018257459 |
| AT1TE22850 | 2.99689 | 2.37E-16    |



|            |         |             |
|------------|---------|-------------|
| AT1G19020  | 3.00427 | 0.002328263 |
| AT1TE54805 | 3.00745 | 1.43E-07    |
| AT1TE58825 | 3.01724 | 6.44E-05    |
| AT3G60920  | 3.02017 | 9.98E-09    |
| AT3G18485  | 3.02449 | 0.012051592 |
| AT4TE19470 | 3.05037 | 7.48E-08    |
| AT3G08870  | 3.07249 | 0.026565027 |
| AT2TE07145 | 3.08089 | 1.39E-14    |
| AT1G16130  | 3.0847  | 0.011568328 |
| AT3G25730  | 3.09246 | 0.003682311 |
| AT4G39770  | 3.10158 | 0.016170961 |
| AT3G29644  | 3.119   | 2.02E-14    |
| AT5G66780  | 3.1213  | 0.000500161 |
| AT3TE76225 | 3.12771 | 3.05E-13    |
| AT4G10695  | 3.12977 | 0.000759783 |
| AT1TE51775 | 3.13235 | 0.000239908 |
| AT5TE39170 | 3.13819 | 0.001275204 |
| AT5G09530  | 3.16735 | 1.03E-06    |
| AT4G38080  | 3.17249 | 0.003637788 |
| AT4TE08240 | 3.19313 | 6.73E-05    |
| AT5G36925  | 3.20502 | 0.038214709 |
| AT2TE78320 | 3.20644 | 3.38E-06    |
| AT3G46280  | 3.22849 | 0.022447916 |
| AT2G18690  | 3.22882 | 1.90E-06    |
| AT1G77950  | 3.2545  | 0.004712229 |
| AT5G39520  | 3.28259 | 0.039773361 |
| AT1TE36060 | 3.29632 | 0.016237747 |
| AT5TE39640 | 3.30097 | 0.005244538 |
| AT3TE48545 | 3.30877 | 1.80E-07    |
| AT2G47520  | 3.30925 | 8.74E-07    |
| AT1TE44230 | 3.3333  | 7.77E-05    |
| AT5G23220  | 3.33358 | 0.000154713 |
| AT2TE10595 | 3.35139 | 7.57E-07    |
| AT5G38310  | 3.36211 | 0.003144149 |
| AT1TE22855 | 3.36821 | 0.000819059 |
| AT5TE37800 | 3.39282 | 0.015780742 |
| AT3G53980  | 3.41723 | 3.88E-06    |
| AT2TE82000 | 3.42272 | 5.17E-11    |
| AT5G38005  | 3.42434 | 3.22E-17    |
| AT5TE40945 | 3.42836 | 0.009042151 |
| AT3G30122  | 3.44567 | 4.71E-10    |
| AT3G48520  | 3.47438 | 0.002642763 |
| AT4TE08780 | 3.47523 | 0.005349646 |
| AT3TE02240 | 3.47797 | 3.05E-20    |
| AT2G41640  | 3.5008  | 1.93E-11    |
| AT4G04223  | 3.50182 | 1.65E-13    |
| AT3G26210  | 3.50218 | 0.00255861  |
| AT3TE58875 | 3.5084  | 2.48E-10    |
| AT5G52750  | 3.5106  | 0.00505174  |

|            |         |             |
|------------|---------|-------------|
| AT1G35140  | 3.53648 | 0.023584486 |
| AT5G54710  | 3.53751 | 0.006097969 |
| AT2G45570  | 3.55383 | 0.002564544 |
| AT5G54720  | 3.55397 | 0.019527874 |
| AT1TE45560 | 3.56263 | 0.009444464 |
| AT3TE64120 | 3.57019 | 0.000740989 |
| AT2G23680  | 3.57434 | 2.30E-05    |
| AT1G61920  | 3.57872 | 2.60E-08    |
| AT3G29639  | 3.59433 | 2.76E-07    |
| AT5TE56690 | 3.60043 | 2.21E-06    |
| AT5G59630  | 3.6114  | 2.22E-10    |
| AT2G20142  | 3.62085 | 0.001550145 |
| AT2TE16335 | 3.62924 | 0.002421948 |
| AT1G09932  | 3.63716 | 0.034591011 |
| AT2G41100  | 3.64675 | 0.000744382 |
| AT2G19893  | 3.64941 | 3.24E-05    |
| AT4G28800  | 3.66627 | 1.40E-05    |
| AT1TE46835 | 3.68231 | 4.10E-13    |
| AT4G25100  | 3.68845 | 0.039590523 |
| AT1G68510  | 3.69381 | 0.000740989 |
| AT5G35338  | 3.69613 | 1.94E-07    |
| AT3TE67950 | 3.71027 | 0.009183297 |
| AT3TE53320 | 3.72234 | 0.032050236 |
| AT1TE46385 | 3.7251  | 0.000367019 |
| AT4G26200  | 3.79393 | 0.001759665 |
| AT4G17914  | 3.79942 | 1.08E-08    |
| AT1G66830  | 3.80018 | 0.02775389  |
| AT2TE20835 | 3.80931 | 0.00110926  |
| AT3G44070  | 3.8305  | 2.67E-25    |
| AT2G01280  | 3.84646 | 0.005053716 |
| AT1TE47695 | 3.86051 | 0.014114354 |
| AT1TE81210 | 3.87154 | 0.022689717 |
| AT2G37870  | 3.89195 | 0.000177311 |
| AT3G60950  | 3.89817 | 0.003144875 |
| AT2G10440  | 3.90482 | 5.99E-12    |
| AT1TE83175 | 3.91682 | 0.026185746 |
| AT1G55390  | 3.92168 | 0.047294132 |
| AT2G04120  | 3.96164 | 1.37E-08    |
| AT2TE27540 | 3.97761 | 0.006549857 |
| AT5TE86410 | 3.97918 | 2.46E-10    |
| AT5TE47750 | 4.00121 | 4.15E-19    |
| AT2G16310  | 4.00322 | 3.82E-14    |
| AT1TE20315 | 4.00843 | 0.001024985 |
| AT4G22470  | 4.01622 | 7.52E-05    |
| AT4G03811  | 4.02698 | 2.15E-08    |
| AT2TE18840 | 4.03902 | 0.000162614 |
| AT5TE86350 | 4.05155 | 0.000364863 |
| AT1G36920  | 4.07602 | 7.56E-20    |
| AT4G30280  | 4.10191 | 0.007476088 |

|            |         |             |
|------------|---------|-------------|
| AT5G35490  | 4.1094  | 4.12E-11    |
| AT1G36922  | 4.14471 | 1.24E-16    |
| AT1G60110  | 4.18062 | 3.25E-05    |
| AT1TE55920 | 4.19497 | 1.54E-20    |
| AT4TE18360 | 4.20556 | 0.008589312 |
| AT3TE52695 | 4.22423 | 0.007003477 |
| AT4TE36845 | 4.22561 | 4.48E-08    |
| AT1G77960  | 4.22653 | 9.83E-09    |
| AT5TE50380 | 4.26698 | 4.89E-25    |
| AT4G03156  | 4.28384 | 0.006918697 |
| AT2TE00115 | 4.29967 | 1.42E-08    |
| AT4TE21900 | 4.33058 | 5.59E-06    |
| AT2TE37435 | 4.33127 | 5.28E-11    |
| AT2G03821  | 4.34021 | 0.018974715 |
| AT2G11522  | 4.34377 | 7.76E-10    |
| AT5G39580  | 4.34658 | 0.029988105 |
| AT3TE48535 | 4.38172 | 9.09E-06    |
| AT3G48650  | 4.38513 | 0.013786852 |
| AT1G28370  | 4.38971 | 0.001714361 |
| AT2TE41175 | 4.396   | 6.90E-17    |
| AT4TE54750 | 4.40525 | 1.77E-05    |
| AT1TE86360 | 4.43344 | 8.49E-12    |
| AT4TE17360 | 4.44709 | 3.71E-09    |
| AT2G35670  | 4.451   | 1.06E-19    |
| AT5G33436  | 4.47761 | 0.025038493 |
| AT1G36675  | 4.49508 | 4.32E-13    |
| AT3TE18040 | 4.49923 | 5.66E-18    |
| AT3TE21700 | 4.50483 | 2.80E-19    |
| AT2TE11860 | 4.5317  | 1.02E-05    |
| AT4G33550  | 4.54991 | 0.003014489 |
| AT3G60176  | 4.58541 | 4.34E-19    |
| AT1G54420  | 4.58846 | 3.60E-15    |
| AT3TE49700 | 4.58893 | 0.00391929  |
| AT4G36430  | 4.61701 | 0.00023977  |
| AT4G13660  | 4.62713 | 0.012363478 |
| AT2G18880  | 4.63166 | 2.52E-14    |
| AT5G12030  | 4.63898 | 0.010912349 |
| AT5G38030  | 4.65604 | 4.03E-10    |
| AT4G23610  | 4.65911 | 0.041896112 |
| AT5TE29680 | 4.67259 | 0.000216025 |
| AT3G33528  | 4.67895 | 8.50E-23    |
| AT4TE32185 | 4.67901 | 1.01E-07    |
| AT2TE18965 | 4.6905  | 9.10E-15    |
| AT2G11626  | 4.69377 | 0.017712178 |
| AT3G04220  | 4.69548 | 0.000249136 |
| AT3TE65525 | 4.71046 | 3.98E-06    |
| AT1G24145  | 4.71617 | 0.028667518 |
| AT5G28660  | 4.7187  | 4.78E-05    |
| AT2G14840  | 4.72024 | 1.77E-05    |

|            |         |             |
|------------|---------|-------------|
| AT5G43066  | 4.72634 | 0.002073368 |
| AT2TE21220 | 4.73974 | 1.04E-15    |
| AT4G26730  | 4.753   | 1.16E-05    |
| AT2TE20915 | 4.76169 | 7.60E-08    |
| AT3TE63180 | 4.76917 | 0.004334083 |
| AT2TE08225 | 4.77552 | 9.30E-24    |
| AT5TE39955 | 4.78709 | 0.017968814 |
| AT4G13680  | 4.81903 | 0.004062602 |
| AT3TE51505 | 4.82081 | 3.55E-06    |
| AT2TE18000 | 4.87145 | 0.004517593 |
| AT1G66790  | 4.87283 | 3.04E-07    |
| AT1TE51850 | 4.88261 | 0.00285576  |
| AT2G01422  | 4.88861 | 3.99E-09    |
| AT5TE48825 | 4.89701 | 0.024507527 |
| AT4G25200  | 4.91502 | 0.001733594 |
| AT1G50350  | 4.9172  | 7.65E-15    |
| AT2TE08300 | 4.92213 | 0.046382009 |
| AT5G37940  | 4.94801 | 0.003418153 |
| AT4TE20075 | 4.97048 | 1.32E-11    |
| AT3G12910  | 4.97139 | 0.04238087  |
| AT2TE20920 | 4.97453 | 3.97E-06    |
| AT2G16340  | 4.97503 | 0.021336633 |
| AT1G36020  | 4.97686 | 3.03E-18    |
| AT1TE52620 | 4.97867 | 0.008179024 |
| AT2TE18015 | 4.9788  | 0.014967935 |
| AT3TE47360 | 4.99129 | 6.07E-25    |
| AT3G01830  | 4.99502 | 0.009500409 |
| AT3TE52705 | 4.99951 | 0.03478335  |
| AT3TE50685 | 5.00818 | 0.01685565  |
| AT1TE35870 | 5.01676 | 1.37E-05    |
| AT5TE44190 | 5.02148 | 4.06E-07    |
| AT2TE13750 | 5.05237 | 2.43E-12    |
| AT3TE47740 | 5.05259 | 3.52E-14    |
| AT1TE53735 | 5.06666 | 5.05E-09    |
| AT3TE58050 | 5.06942 | 0.017968814 |
| AT1TE45960 | 5.0764  | 0.008340632 |
| AT2G16960  | 5.0852  | 4.90E-11    |
| AT1G49680  | 5.08664 | 0.000121292 |
| AT2TE27670 | 5.09064 | 2.16E-06    |
| AT4G08260  | 5.12089 | 5.49E-24    |
| AT1TE53915 | 5.12177 | 0.035307391 |
| AT4TE15950 | 5.12654 | 0.023371621 |
| AT3TE50375 | 5.12911 | 0.000140289 |
| AT2TE41170 | 5.13116 | 1.09E-19    |
| AT4G14370  | 5.13206 | 0.046795289 |
| AT1TE54100 | 5.14115 | 6.38E-27    |
| AT5TE47400 | 5.17033 | 0.000299074 |
| AT3TE60310 | 5.18783 | 3.83E-38    |
| AT3G28923  | 5.18871 | 1.66E-14    |

|            |         |             |
|------------|---------|-------------|
| AT2G13547  | 5.2002  | 1.44E-20    |
| AT2TE23425 | 5.20218 | 1.96E-14    |
| AT2TE28955 | 5.21307 | 1.25E-13    |
| AT5TE23285 | 5.21365 | 1.36E-11    |
| AT4G28870  | 5.21981 | 6.64E-09    |
| AT5G33390  | 5.26387 | 0.014571497 |
| AT4TE20545 | 5.29048 | 3.74E-07    |
| AT1TE46220 | 5.29454 | 3.55E-10    |
| AT3G45910  | 5.32735 | 5.36E-07    |
| AT2TE12425 | 5.33015 | 0.000609068 |
| AT2TE11410 | 5.33094 | 3.79E-09    |
| AT4TE22570 | 5.33325 | 0.004388311 |
| AT3TE51270 | 5.3402  | 0.002292734 |
| AT2G15120  | 5.34368 | 0.007013931 |
| AT2TE54360 | 5.34506 | 0.000902415 |
| AT3TE63400 | 5.34836 | 1.05E-11    |
| AT2G14405  | 5.36509 | 5.11E-05    |
| AT3G48130  | 5.39875 | 9.71E-06    |
| AT3TE52975 | 5.42822 | 1.29E-13    |
| AT2TE09650 | 5.43686 | 0.000141594 |
| AT5TE53035 | 5.45085 | 1.51E-09    |
| AT2TE28020 | 5.47213 | 2.82E-35    |
| AT2TE37330 | 5.48176 | 3.80E-06    |
| AT2G10990  | 5.48705 | 0.013644597 |
| AT4TE08355 | 5.48825 | 0.002759117 |
| AT2TE01560 | 5.49231 | 2.16E-19    |
| AT4G10500  | 5.50092 | 0.019511443 |
| AT5TE93055 | 5.51451 | 5.97E-05    |
| AT2G36710  | 5.52228 | 0.006034289 |
| AT5TE38900 | 5.54126 | 1.89E-06    |
| AT4TE19675 | 5.54484 | 6.50E-07    |
| AT4TE29830 | 5.55274 | 6.93E-13    |
| AT1G53480  | 5.56058 | 1.90E-37    |
| AT3G32377  | 5.56149 | 2.77E-31    |
| AT3TE54330 | 5.56758 | 6.19E-10    |
| AT4TE21910 | 5.59849 | 4.09E-07    |
| AT2G11405  | 5.62373 | 1.43E-06    |
| AT3TE44695 | 5.64478 | 0.002356475 |
| AT1G24380  | 5.65919 | 6.51E-07    |
| AT5TE40110 | 5.66542 | 0.000513931 |
| AT2TE24245 | 5.67629 | 8.70E-08    |
| AT3TE63405 | 5.69065 | 1.41E-13    |
| AT2TE17695 | 5.69969 | 3.61E-06    |
| AT5G10680  | 5.7036  | 0.002400687 |
| AT2G07640  | 5.71818 | 4.55E-13    |
| AT3G43833  | 5.72008 | 5.40E-44    |
| AT5TE47755 | 5.73427 | 1.64E-25    |
| AT5TE39195 | 5.74611 | 0.000528175 |
| AT3TE48070 | 5.74932 | 2.32E-22    |

|            |         |             |
|------------|---------|-------------|
| AT5G55150  | 5.75298 | 0.001362608 |
| AT5G05340  | 5.75337 | 1.94E-08    |
| AT1G33840  | 5.75703 | 0.006811521 |
| AT3TE37570 | 5.76503 | 1.79E-15    |
| AT5TE37060 | 5.76749 | 3.10E-15    |
| AT1TE41035 | 5.77768 | 7.77E-09    |
| AT3TE92345 | 5.81279 | 0.000251849 |
| AT4TE21055 | 5.81572 | 1.48E-48    |
| AT1TE51945 | 5.83458 | 1.14E-15    |
| AT1G37000  | 5.83744 | 6.68E-21    |
| AT5G35760  | 5.8408  | 1.18E-33    |
| AT5G01380  | 5.85132 | 0.003178545 |
| AT1TE45510 | 5.86328 | 7.49E-15    |
| AT5G32569  | 5.8922  | 1.75E-06    |
| AT1TE42370 | 5.89345 | 0.000686297 |
| AT2TE10570 | 5.89744 | 6.85E-30    |
| AT5TE43070 | 5.90973 | 4.38E-21    |
| AT3TE46565 | 5.91532 | 0.00027502  |
| AT3TE45330 | 5.9182  | 3.61E-10    |
| AT4TE15670 | 5.93862 | 4.08E-43    |
| AT2TE22315 | 5.95111 | 0.00014241  |
| AT3TE60160 | 5.97308 | 3.60E-19    |
| AT5TE47205 | 5.98398 | 1.87E-20    |
| AT3TE63935 | 5.99085 | 3.97E-48    |
| AT2G05752  | 5.99156 | 2.18E-05    |
| AT2TE22345 | 6.00242 | 3.00E-09    |
| AT5TE46150 | 6.01253 | 8.28E-05    |
| AT2G05050  | 6.019   | 3.99E-17    |
| AT1TE47605 | 6.02775 | 3.97E-20    |
| AT4TE28010 | 6.05594 | 8.38E-06    |
| AT3TE44955 | 6.07217 | 1.50E-20    |
| AT4TE17500 | 6.08124 | 7.81E-15    |
| AT3G28899  | 6.0998  | 3.27E-12    |
| AT2TE10385 | 6.10338 | 3.09E-14    |
| AT3G30720  | 6.10956 | 2.53E-34    |
| AT5TE38020 | 6.11341 | 2.03E-28    |
| AT3TE47555 | 6.15207 | 2.14E-38    |
| AT1G34440  | 6.1717  | 1.76E-05    |
| AT3G30770  | 6.1896  | 8.20E-31    |
| AT1TE51555 | 6.19431 | 1.53E-05    |
| AT1TE51155 | 6.21748 | 5.42E-13    |
| AT3TE45980 | 6.22287 | 4.59E-07    |
| AT1G65500  | 6.23524 | 6.06E-08    |
| AT5G19470  | 6.25095 | 0.033934534 |
| AT5G15690  | 6.25768 | 3.32E-34    |
| AT1TE54655 | 6.26795 | 2.64E-30    |
| AT3G61280  | 6.27458 | 0.004335148 |
| AT1G26558  | 6.27477 | 1.32E-37    |
| AT3TE57315 | 6.28329 | 4.35E-12    |

|            |         |             |
|------------|---------|-------------|
| AT3TE66175 | 6.28531 | 1.33E-06    |
| AT5G41830  | 6.28927 | 9.95E-23    |
| AT3TE57785 | 6.2909  | 2.07E-24    |
| AT2TE28555 | 6.29469 | 1.15E-37    |
| AT4TE13315 | 6.30186 | 8.91E-06    |
| AT3TE61645 | 6.32375 | 1.86E-05    |
| AT2TE22170 | 6.34279 | 1.62E-06    |
| AT2TE13760 | 6.36247 | 4.17E-06    |
| AT3TE83700 | 6.36811 | 1.86E-14    |
| AT5TE46820 | 6.38134 | 9.84E-08    |
| AT2G11851  | 6.38525 | 1.69E-41    |
| AT3TE53860 | 6.38854 | 4.59E-16    |
| AT5TE39245 | 6.39425 | 1.84E-12    |
| AT2G15555  | 6.39896 | 4.89E-18    |
| AT2TE27505 | 6.40827 | 9.91E-26    |
| AT1G66100  | 6.41069 | 0.003600217 |
| AT2TE28280 | 6.41167 | 1.34E-24    |
| AT2TE22180 | 6.41539 | 1.89E-07    |
| AT3TE67635 | 6.42839 | 2.49E-29    |
| AT2TE09720 | 6.43401 | 6.82E-07    |
| AT4TE15565 | 6.43983 | 1.08E-07    |
| AT3TE67325 | 6.44751 | 3.87E-36    |
| AT4TE09845 | 6.4613  | 2.42E-28    |
| AT3TE57715 | 6.48384 | 1.89E-07    |
| AT5TE45005 | 6.48499 | 1.09E-21    |
| AT2TE11985 | 6.5084  | 6.63E-16    |
| AT5TE34980 | 6.52267 | 4.07E-49    |
| AT1G27990  | 6.5239  | 5.86E-07    |
| AT3G27473  | 6.52919 | 1.75E-41    |
| AT4TE16900 | 6.53474 | 1.90E-06    |
| AT5TE41775 | 6.56506 | 3.39E-11    |
| AT1TE46325 | 6.56557 | 3.16E-09    |
| AT2TE10575 | 6.56717 | 1.79E-28    |
| AT1TE44720 | 6.6068  | 1.67E-08    |
| AT5TE39590 | 6.62755 | 1.34E-18    |
| AT3TE59500 | 6.62916 | 1.08E-06    |
| AT3TE59340 | 6.63642 | 9.97E-09    |
| AT4TE24910 | 6.66247 | 4.59E-16    |
| AT2TE18240 | 6.67022 | 3.70E-31    |
| AT1TE27905 | 6.69133 | 6.77E-05    |
| AT4TE16945 | 6.69251 | 5.88E-18    |
| AT2G13760  | 6.70014 | 2.31E-05    |
| AT2TE15900 | 6.70067 | 8.37E-18    |
| AT3TE59660 | 6.70846 | 1.26E-51    |
| AT2G05914  | 6.71859 | 5.66E-62    |
| AT5TE41415 | 6.72745 | 7.77E-34    |
| AT4TE09310 | 6.73723 | 2.85E-11    |
| AT5TE58750 | 6.73758 | 3.18E-08    |
| AT1G62580  | 6.75658 | 9.57E-14    |

|            |         |             |
|------------|---------|-------------|
| AT5TE47215 | 6.77029 | 0.006076847 |
| AT1TE52000 | 6.82857 | 2.15E-12    |
| AT3TE54450 | 6.83004 | 1.61E-09    |
| AT5TE46860 | 6.86644 | 6.88E-21    |
| AT5G39770  | 6.87275 | 1.58E-28    |
| AT4G08093  | 6.88616 | 1.80E-40    |
| AT2TE21605 | 6.90289 | 3.19E-11    |
| AT5TE65370 | 6.91049 | 4.22E-43    |
| AT5G20440  | 6.93654 | 3.06E-08    |
| AT5TE38340 | 6.93819 | 7.37E-36    |
| AT5TE25460 | 6.95615 | 1.54E-10    |
| AT2TE16805 | 7.00262 | 4.84E-42    |
| AT5G28230  | 7.00288 | 2.55E-39    |
| AT4TE18785 | 7.01717 | 4.06E-09    |
| AT4G06748  | 7.02238 | 7.25E-55    |
| AT4TE13880 | 7.02648 | 4.58E-20    |
| AT3TE57085 | 7.03413 | 3.66E-18    |
| AT5TE42710 | 7.03907 | 1.87E-46    |
| AT2G13410  | 7.04899 | 6.00E-21    |
| AT5TE50155 | 7.05438 | 2.77E-19    |
| AT4TE19030 | 7.05475 | 4.25E-10    |
| AT4G07526  | 7.07471 | 4.54E-25    |
| AT1TE42400 | 7.10296 | 1.75E-08    |
| AT3G32200  | 7.1059  | 4.07E-10    |
| AT1TE43740 | 7.10767 | 2.96E-11    |
| AT5TE43910 | 7.10777 | 8.73E-26    |
| AT1TE58100 | 7.10932 | 1.81E-09    |
| AT3TE59025 | 7.11177 | 2.51E-13    |
| AT3TE42960 | 7.11378 | 2.95E-10    |
| AT5G28235  | 7.11453 | 3.47E-31    |
| AT1G47595  | 7.12999 | 2.45E-16    |
| AT3TE53690 | 7.13639 | 4.81E-15    |
| AT5TE46840 | 7.18047 | 1.45E-19    |
| AT3TE61075 | 7.19058 | 3.92E-49    |
| AT2TE25540 | 7.19541 | 6.85E-09    |
| AT2TE19175 | 7.22265 | 2.69E-09    |
| AT2TE15655 | 7.22987 | 2.08E-25    |
| AT1G18230  | 7.23634 | 1.27E-10    |
| AT5TE46485 | 7.24202 | 1.12E-37    |
| AT5TE61735 | 7.24323 | 6.96E-41    |
| AT1TE46635 | 7.2499  | 9.84E-09    |
| AT5TE45900 | 7.25503 | 3.03E-12    |
| AT5TE23185 | 7.2755  | 7.16E-60    |
| AT2TE26785 | 7.28758 | 8.64E-12    |
| AT3TE45430 | 7.29134 | 1.42E-46    |
| AT1TE45965 | 7.30619 | 4.72E-21    |
| AT4TE08245 | 7.3176  | 1.86E-16    |
| AT2TE05675 | 7.32204 | 7.44E-25    |
| AT1TE52990 | 7.32661 | 2.04E-41    |



|            |         |             |
|------------|---------|-------------|
| AT5TE44185 | 7.35342 | 1.28E-12    |
| AT2TE23965 | 7.35662 | 2.90E-25    |
| AT5TE48930 | 7.35852 | 3.86E-19    |
| AT4TE06990 | 7.36458 | 2.28E-18    |
| AT2TE12140 | 7.39315 | 1.52E-12    |
| AT4TE18765 | 7.39338 | 1.58E-06    |
| AT2TE28290 | 7.40035 | 2.15E-12    |
| AT3G07380  | 7.40529 | 7.60E-22    |
| AT3G26800  | 7.41051 | 7.42E-07    |
| AT5TE55555 | 7.41091 | 5.35E-57    |
| AT2TE12145 | 7.41981 | 3.57E-13    |
| AT1TE43040 | 7.42729 | 3.45E-13    |
| AT3G30370  | 7.4337  | 3.18E-13    |
| AT2G19850  | 7.45643 | 8.78E-44    |
| AT5G45570  | 7.4742  | 2.37E-60    |
| AT2TE16270 | 7.47497 | 3.94E-13    |
| AT2G16018  | 7.4788  | 3.55E-53    |
| AT5TE39140 | 7.48118 | 1.27E-63    |
| AT2G33175  | 7.48549 | 5.18E-40    |
| AT1TE28830 | 7.49596 | 2.52E-59    |
| AT3TE55360 | 7.50536 | 3.30E-21    |
| AT5TE37985 | 7.52383 | 0.000124295 |
| AT2TE06955 | 7.55205 | 3.01E-36    |
| AT1TE74860 | 7.55551 | 1.38E-43    |
| AT4TE67560 | 7.55837 | 3.71E-52    |
| AT4TE10675 | 7.56169 | 1.15E-34    |
| AT5TE83215 | 7.56346 | 1.79E-09    |
| AT5TE46155 | 7.58693 | 5.68E-63    |
| AT4G19240  | 7.61444 | 2.35E-50    |
| AT5TE38285 | 7.64903 | 1.62E-57    |
| AT5TE49335 | 7.66796 | 4.99E-29    |
| AT2G06002  | 7.67583 | 1.32E-52    |
| AT3TE49825 | 7.69565 | 1.81E-34    |
| AT2TE35840 | 7.72944 | 4.00E-11    |
| AT2G06095  | 7.76683 | 3.65E-15    |
| AT5TE41835 | 7.7807  | 4.75E-07    |
| AT1G67105  | 7.78108 | 3.77E-70    |
| AT3TE90530 | 7.78581 | 4.14E-33    |
| AT5TE47105 | 7.79669 | 1.75E-20    |
| AT3TE20780 | 7.81426 | 1.86E-41    |
| AT4TE13450 | 7.81942 | 3.97E-16    |
| AT4G15242  | 7.84034 | 1.76E-44    |
| AT3TE52540 | 7.8421  | 6.35E-17    |
| AT1TE49325 | 7.84814 | 2.45E-14    |
| AT3TE64215 | 7.8638  | 3.81E-25    |
| AT3TE50575 | 7.8921  | 5.00E-23    |
| AT2TE10980 | 7.90265 | 1.89E-53    |
| AT5TE55145 | 7.90861 | 1.63E-09    |
| AT1TE52855 | 7.91    | 8.91E-19    |

|            |         |          |
|------------|---------|----------|
| AT1TE96425 | 7.91115 | 2.09E-24 |
| AT2TE23855 | 7.92899 | 1.22E-11 |
| AT4TE16745 | 7.93199 | 6.30E-19 |
| AT1G18130  | 7.94214 | 5.56E-10 |
| AT5TE64600 | 7.94224 | 1.83E-48 |
| AT3G27140  | 7.94723 | 3.00E-17 |
| AT5G28180  | 7.95204 | 5.91E-21 |
| AT2TE20035 | 7.97404 | 5.21E-20 |
| AT3TE53865 | 7.98505 | 2.28E-56 |
| AT4TE20535 | 8.00704 | 1.27E-16 |
| AT5TE44235 | 8.01684 | 8.17E-59 |
| AT5TE46110 | 8.04442 | 1.32E-19 |
| AT5TE40100 | 8.06653 | 2.38E-17 |
| AT5TE18470 | 8.06797 | 6.65E-19 |
| AT2TE28325 | 8.07982 | 3.03E-54 |
| AT5TE22990 | 8.09355 | 3.89E-18 |
| AT1TE70805 | 8.10091 | 4.31E-16 |
| AT3TE45630 | 8.10354 | 7.59E-20 |
| AT2TE16955 | 8.11144 | 3.42E-32 |
| AT2TE58010 | 8.12622 | 2.30E-19 |
| AT4TE18315 | 8.17141 | 3.45E-37 |
| AT2TE11805 | 8.17172 | 4.88E-41 |
| AT2TE11890 | 8.17273 | 2.70E-50 |
| AT1TE39380 | 8.17309 | 4.07E-53 |
| AT1TE27295 | 8.18918 | 1.83E-57 |
| AT2TE20140 | 8.19681 | 4.15E-34 |
| AT2TE08135 | 8.20503 | 1.41E-65 |
| AT5TE37660 | 8.21033 | 1.43E-21 |
| AT1G46696  | 8.21162 | 2.31E-42 |
| AT3G01345  | 8.21842 | 9.14E-82 |
| AT4G08430  | 8.21911 | 8.46E-51 |
| AT2TE16580 | 8.2249  | 3.45E-18 |
| AT5TE46175 | 8.22936 | 7.49E-24 |
| AT3G14670  | 8.23072 | 9.87E-25 |
| AT1TE52860 | 8.23745 | 2.56E-22 |
| AT3G54730  | 8.239   | 3.65E-33 |
| AT5TE43580 | 8.24373 | 7.19E-50 |
| AT4G06597  | 8.2453  | 9.57E-25 |
| AT5TE47170 | 8.24584 | 2.80E-26 |
| AT1TE51835 | 8.24598 | 2.71E-22 |
| AT2TE19200 | 8.2515  | 5.03E-62 |
| AT3TE53605 | 8.25856 | 2.94E-27 |
| AT2TE37050 | 8.28516 | 1.84E-45 |
| AT2TE18330 | 8.30313 | 3.98E-21 |
| AT4TE08850 | 8.30868 | 3.81E-09 |
| AT1TE47105 | 8.32608 | 2.93E-20 |
| AT4TE08995 | 8.33834 | 2.08E-50 |
| AT5TE42435 | 8.35045 | 6.00E-17 |
| AT2TE06620 | 8.36331 | 2.66E-50 |

|            |         |          |
|------------|---------|----------|
| AT5TE49755 | 8.36436 | 1.23E-42 |
| AT4TE18625 | 8.38765 | 4.73E-28 |
| AT4G04250  | 8.38989 | 1.27E-54 |
| AT5TE42925 | 8.3969  | 1.55E-37 |
| AT1G27565  | 8.40774 | 1.30E-42 |
| AT3TE61290 | 8.40947 | 1.52E-28 |
| AT4G07320  | 8.40951 | 6.48E-28 |
| AT5TE42035 | 8.40966 | 8.86E-46 |
| AT3TE63215 | 8.41301 | 2.16E-13 |
| AT4TE18650 | 8.41955 | 2.43E-17 |
| AT3G31910  | 8.42362 | 4.02E-40 |
| AT1TE46970 | 8.42844 | 3.36E-11 |
| AT5TE44310 | 8.43311 | 2.89E-21 |
| AT2TE16865 | 8.43858 | 3.01E-26 |
| AT3TE54575 | 8.44716 | 2.39E-43 |
| AT5G28810  | 8.44892 | 1.47E-70 |
| AT4TE25065 | 8.45155 | 2.78E-23 |
| AT5TE43815 | 8.45598 | 1.96E-67 |
| AT3TE53745 | 8.48773 | 2.00E-40 |
| AT3TE53995 | 8.49315 | 4.08E-86 |
| AT5TE42470 | 8.49618 | 4.44E-82 |
| AT3TE50500 | 8.51328 | 1.41E-28 |
| AT2TE23670 | 8.51641 | 1.21E-22 |
| AT5TE33315 | 8.56957 | 9.21E-35 |
| AT2TE24735 | 8.59112 | 2.04E-57 |
| AT5G29030  | 8.59227 | 5.14E-39 |
| AT2TE12115 | 8.59648 | 2.07E-27 |
| AT3TE48135 | 8.60558 | 1.58E-72 |
| AT2TE16585 | 8.61558 | 8.56E-35 |
| AT2TE20940 | 8.65286 | 5.47E-70 |
| AT5TE56585 | 8.66922 | 1.06E-11 |
| AT5G34869  | 8.67277 | 5.89E-74 |
| AT5TE32885 | 8.68233 | 1.61E-10 |
| AT3TE55365 | 8.69575 | 4.47E-70 |
| AT5G37140  | 8.70205 | 4.39E-31 |
| AT1TE42875 | 8.71042 | 6.64E-54 |
| AT2TE16530 | 8.7119  | 3.25E-61 |
| AT4TE46305 | 8.72542 | 3.07E-44 |
| AT2TE15660 | 8.74015 | 7.35E-24 |
| AT1TE55795 | 8.75716 | 4.16E-29 |
| AT5TE47100 | 8.76861 | 2.01E-38 |
| AT2TE15415 | 8.77721 | 3.03E-15 |
| AT5TE39425 | 8.79309 | 3.14E-80 |
| AT4TE44080 | 8.80151 | 4.32E-54 |
| AT3TE59885 | 8.8087  | 8.33E-34 |
| AT1TE72615 | 8.81884 | 2.16E-51 |
| AT1TE45175 | 8.82007 | 6.54E-33 |
| AT3TE57310 | 8.83025 | 7.84E-63 |
| AT5TE32355 | 8.83221 | 1.05E-26 |

|            |         |          |
|------------|---------|----------|
| AT4TE17070 | 8.83881 | 4.05E-27 |
| AT2TE26370 | 8.83889 | 2.93E-22 |
| AT2G17690  | 8.86313 | 1.20E-86 |
| AT1TE53060 | 8.88069 | 7.55E-69 |
| AT1TE52120 | 8.88308 | 3.85E-25 |
| AT2TE20925 | 8.91389 | 9.16E-40 |
| AT2TE16245 | 8.9257  | 1.85E-45 |
| AT4TE15270 | 8.9265  | 3.52E-33 |
| AT3TE59045 | 8.9303  | 1.87E-28 |
| AT5TE39230 | 8.93468 | 1.63E-39 |
| AT3TE53580 | 8.94775 | 3.41E-55 |
| AT4TE22955 | 8.95128 | 7.25E-54 |
| AT5TE46210 | 8.96132 | 2.17E-92 |
| AT5G45095  | 8.96217 | 7.50E-82 |
| AT4TE09080 | 8.96369 | 8.07E-33 |
| AT5TE42330 | 8.97437 | 5.32E-23 |
| AT2TE10975 | 8.97981 | 9.17E-52 |
| AT2TE19485 | 8.98159 | 6.62E-23 |
| AT2TE20935 | 8.99268 | 4.07E-36 |
| AT1TE54645 | 9.00448 | 1.08E-43 |
| AT5TE41770 | 9.02707 | 2.22E-28 |
| AT3TE61065 | 9.03006 | 2.46E-57 |
| AT5TE25535 | 9.03253 | 8.97E-27 |
| AT1TE62470 | 9.03494 | 5.44E-87 |
| AT4TE09580 | 9.04286 | 5.61E-12 |
| AT3TE62735 | 9.04515 | 4.98E-53 |
| AT5TE58755 | 9.05837 | 3.74E-30 |
| AT1TE49300 | 9.07103 | 3.52E-42 |
| AT2TE21105 | 9.07165 | 4.70E-23 |
| AT2TE16860 | 9.07196 | 4.23E-43 |
| AT2TE18415 | 9.07196 | 6.20E-15 |
| AT5G26270  | 9.08424 | 4.83E-88 |
| AT3TE68090 | 9.08986 | 5.92E-35 |
| AT3G43148  | 9.10517 | 2.59E-49 |
| AT3TE60195 | 9.11656 | 5.41E-37 |
| AT2TE22235 | 9.11929 | 3.23E-29 |
| AT3TE22200 | 9.13713 | 1.57E-58 |
| AT2G07750  | 9.13732 | 2.64E-30 |
| AT2TE16425 | 9.14404 | 4.97E-57 |
| AT5TE20395 | 9.1444  | 4.29E-16 |
| AT1G35617  | 9.14585 | 7.18E-30 |
| AT5G32590  | 9.14899 | 1.57E-50 |
| AT1G36078  | 9.16059 | 5.75E-19 |
| AT2TE12020 | 9.16574 | 2.25E-59 |
| AT2TE20030 | 9.17304 | 1.34E-46 |
| AT2G06420  | 9.17338 | 5.63E-27 |
| AT5TE40575 | 9.18862 | 4.53E-82 |
| AT1TE51040 | 9.19125 | 1.39E-34 |
| AT4G06582  | 9.19425 | 7.79E-34 |

|            |         |          |
|------------|---------|----------|
| AT4G25530  | 9.19522 | 4.20E-88 |
| AT2TE07745 | 9.19719 | 3.35E-10 |
| AT3TE58020 | 9.20382 | 1.43E-78 |
| AT3TE57150 | 9.21013 | 3.75E-45 |
| AT3TE61160 | 9.24799 | 4.06E-57 |
| AT5TE52400 | 9.25069 | 8.92E-30 |
| AT5TE41420 | 9.25354 | 8.39E-72 |
| AT5TE47895 | 9.25466 | 4.03E-33 |
| AT5TE43535 | 9.25833 | 1.02E-30 |
| AT4TE16500 | 9.25838 | 3.68E-32 |
| AT2TE17625 | 9.26005 | 1.06E-15 |
| AT2TE13060 | 9.26216 | 2.55E-16 |
| AT2TE16235 | 9.28591 | 1.05E-77 |
| AT2TE19435 | 9.2886  | 3.25E-64 |
| AT3TE70635 | 9.29752 | 3.61E-67 |
| AT4TE18435 | 9.30083 | 9.33E-84 |
| AT3TE54710 | 9.3029  | 6.52E-33 |
| AT2TE22075 | 9.30335 | 4.02E-67 |
| AT1TE19130 | 9.31024 | 3.15E-45 |
| AT3G29080  | 9.31036 | 3.46E-33 |
| AT3TE61555 | 9.3167  | 1.62E-23 |
| AT2TE25365 | 9.33423 | 2.57E-33 |
| AT4TE18445 | 9.34083 | 2.67E-54 |
| AT5TE52855 | 9.34644 | 3.87E-41 |
| AT3TE63540 | 9.34832 | 5.46E-87 |
| AT4G03830  | 9.35166 | 9.97E-34 |
| AT5TE38320 | 9.36135 | 3.86E-60 |
| AT5TE39325 | 9.36163 | 3.25E-29 |
| AT2TE20255 | 9.36463 | 1.23E-87 |
| AT2TE19595 | 9.38079 | 3.61E-69 |
| AT2TE43165 | 9.39383 | 1.12E-31 |
| AT1TE65060 | 9.40428 | 7.52E-96 |
| AT4TE18055 | 9.43606 | 1.23E-38 |
| AT3TE51460 | 9.44689 | 2.25E-96 |
| AT1G47265  | 9.45656 | 2.23E-28 |
| AT2TE23705 | 9.46086 | 1.45E-89 |
| AT2TE05755 | 9.46893 | 1.06E-42 |
| AT4TE15440 | 9.47278 | 5.11E-77 |
| AT2TE16575 | 9.47642 | 2.00E-41 |
| AT3G43340  | 9.48338 | 7.65E-42 |
| AT3TE61600 | 9.4851  | 9.40E-55 |
| AT4TE20400 | 9.49013 | 4.67E-56 |
| AT1TE52590 | 9.49443 | 1.69E-71 |
| AT1TE64830 | 9.50397 | 1.22E-59 |
| AT2TE17725 | 9.51401 | 1.49E-70 |
| AT4TE18470 | 9.51434 | 4.08E-35 |
| AT1TE42445 | 9.52144 | 3.55E-54 |
| AT5G29040  | 9.54251 | 2.29E-53 |
| AT3TE67445 | 9.5492  | 5.10E-65 |

|            |         |             |
|------------|---------|-------------|
| AT3TE62685 | 9.55089 | 4.86E-59    |
| AT5G41660  | 9.56136 | 2.34E-63    |
| AT3TE51330 | 9.56721 | 3.08E-31    |
| AT5TE44890 | 9.56995 | 0.008076843 |
| AT1TE82600 | 9.57241 | 1.57E-62    |
| AT3TE51735 | 9.58065 | 7.77E-85    |
| AT4TE19920 | 9.58313 | 2.15E-37    |
| AT1TE50875 | 9.58319 | 1.65E-43    |
| AT2TE28025 | 9.58698 | 8.32E-56    |
| AT1TE53390 | 9.58813 | 5.92E-71    |
| AT1TE54640 | 9.59405 | 6.86E-44    |
| AT3TE50940 | 9.60116 | 1.15E-43    |
| AT5TE43360 | 9.60169 | 4.43E-29    |
| AT5TE44740 | 9.60268 | 7.65E-45    |
| AT1TE46235 | 9.60801 | 2.22E-07    |
| AT4TE09995 | 9.61184 | 1.00E-36    |
| AT4TE08475 | 9.61396 | 1.49E-34    |
| AT5TE39315 | 9.63937 | 4.62E-22    |
| AT2TE11545 | 9.64261 | 1.77E-44    |
| AT5TE42860 | 9.65066 | 1.61E-37    |
| AT2TE10260 | 9.65759 | 3.66E-42    |
| AT3TE48150 | 9.66042 | 1.60E-60    |
| AT2TE23185 | 9.67713 | 7.32E-56    |
| AT4TE15280 | 9.68594 | 3.56E-43    |
| AT1G44040  | 9.68604 | 1.53E-19    |
| AT4TE25050 | 9.69271 | 1.41E-45    |
| AT2TE23970 | 9.693   | 8.63E-25    |
| AT5TE42350 | 9.69566 | 2.23E-29    |
| AT1TE44455 | 9.69781 | 2.84E-44    |
| AT2TE13350 | 9.70326 | 1.64E-66    |
| AT1TE64825 | 9.7046  | 4.66E-55    |
| AT5TE44365 | 9.70882 | 4.11E-34    |
| AT5TE44730 | 9.71194 | 2.64E-71    |
| AT2TE16590 | 9.71232 | 3.72E-18    |
| AT1TE52950 | 9.71912 | 1.03E-95    |
| AT2TE18155 | 9.73507 | 1.35E-38    |
| AT2TE16415 | 9.73599 | 1.37E-30    |
| AT4TE16080 | 9.74158 | 4.18E-49    |
| AT3TE56700 | 9.75074 | 5.49E-13    |
| AT3TE53630 | 9.75149 | 1.25E-33    |
| AT1TE52205 | 9.75164 | 2.15E-93    |
| AT4G07965  | 9.75248 | 9.47E-54    |
| AT2G11010  | 9.75272 | 1.24E-25    |
| AT2TE21110 | 9.75329 | 6.33E-18    |
| AT2TE17110 | 9.75535 | 5.11E-97    |
| AT5TE42440 | 9.76281 | 1.92E-79    |
| AT2TE09735 | 9.76437 | 2.67E-54    |
| AT3TE48120 | 9.76975 | 4.26E-90    |
| AT4TE16400 | 9.78989 | 8.10E-88    |

|            |          |           |
|------------|----------|-----------|
| AT5TE43855 | 9.79557  | 2.76E-37  |
| AT3TE51660 | 9.79654  | 1.10E-63  |
| AT1TE52985 | 9.79727  | 4.29E-69  |
| AT3TE50025 | 9.80621  | 1.09E-97  |
| AT5TE42965 | 9.81367  | 3.75E-61  |
| AT4TE15255 | 9.81812  | 2.30E-58  |
| AT4TE15820 | 9.82481  | 6.55E-90  |
| AT5TE33455 | 9.82955  | 3.84E-63  |
| AT2TE27645 | 9.84735  | 7.02E-57  |
| AT2TE26315 | 9.85512  | 6.38E-40  |
| AT3TE52320 | 9.85525  | 2.92E-59  |
| AT3TE57645 | 9.87265  | 3.83E-57  |
| AT4TE15875 | 9.87597  | 3.56E-93  |
| AT5TE55490 | 9.87953  | 6.16E-72  |
| AT4TE16990 | 9.8852   | 1.39E-18  |
| AT1TE46065 | 9.88775  | 4.88E-37  |
| AT1TE46765 | 9.89041  | 3.80E-61  |
| AT4TE15870 | 9.89065  | 4.77E-49  |
| AT5TE47500 | 9.89166  | 4.58E-38  |
| AT5TE18885 | 9.89822  | 8.19E-45  |
| AT4TE09510 | 9.9011   | 2.31E-53  |
| AT1TE52610 | 9.90273  | 3.00E-17  |
| AT2TE06610 | 9.91088  | 4.03E-59  |
| AT5TE42420 | 9.92501  | 1.41E-99  |
| AT3TE60200 | 9.92692  | 2.92E-40  |
| AT5TE48205 | 9.94394  | 2.60E-40  |
| AT4TE09085 | 9.94598  | 1.24E-86  |
| AT5TE53465 | 9.94759  | 6.69E-54  |
| AT5TE36940 | 9.95148  | 1.47E-92  |
| AT1TE46330 | 9.9533   | 1.16E-66  |
| AT3TE51340 | 9.95744  | 3.38E-11  |
| AT2TE27465 | 9.96454  | 4.23E-45  |
| AT3TE62025 | 9.97088  | 3.08E-46  |
| AT3TE69350 | 9.9749   | 1.84E-93  |
| AT5TE40295 | 9.98775  | 4.23E-61  |
| AT1G63540  | 9.99409  | 7.76E-24  |
| AT4TE18680 | 9.99709  | 9.23E-36  |
| AT2TE15565 | 10.00771 | 1.29E-58  |
| AT1TE70815 | 10.00897 | 3.44E-86  |
| AT4TE14295 | 10.01048 | 1.69E-58  |
| AT3TE50670 | 10.01745 | 1.48E-71  |
| AT1TE55320 | 10.04065 | 7.70E-102 |
| AT1TE45020 | 10.04703 | 8.71E-93  |
| AT2TE16230 | 10.04881 | 7.67E-48  |
| AT1TE48035 | 10.06221 | 9.12E-99  |
| AT2TE25740 | 10.0658  | 8.40E-68  |
| AT5TE44415 | 10.07066 | 3.47E-40  |
| AT2TE22040 | 10.0783  | 5.80E-93  |
| AT1TE47750 | 10.08236 | 8.61E-44  |

|            |          |           |
|------------|----------|-----------|
| AT3TE58895 | 10.08646 | 5.86E-86  |
| AT3TE53970 | 10.09607 | 7.66E-29  |
| AT5TE54525 | 10.10172 | 1.36E-48  |
| AT2TE16310 | 10.10931 | 4.17E-81  |
| AT5TE43975 | 10.1094  | 1.87E-79  |
| AT4TE21170 | 10.11566 | 1.46E-74  |
| AT2TE16420 | 10.11571 | 1.32E-51  |
| AT4TE21190 | 10.12763 | 4.81E-52  |
| AT3TE52310 | 10.14135 | 9.89E-49  |
| AT5TE48550 | 10.14321 | 8.78E-43  |
| AT1TE49315 | 10.14367 | 8.08E-45  |
| AT1TE51055 | 10.15164 | 9.52E-53  |
| AT4TE05190 | 10.1523  | 4.63E-96  |
| AT1TE52210 | 10.15676 | 3.64E-52  |
| AT4TE18720 | 10.15893 | 3.67E-55  |
| AT3TE54005 | 10.16109 | 3.36E-97  |
| AT2TE24525 | 10.16295 | 5.89E-96  |
| AT2TE11925 | 10.16358 | 7.13E-53  |
| AT5TE37965 | 10.16438 | 4.47E-100 |
| AT3TE57395 | 10.16549 | 2.72E-97  |
| AT1TE51820 | 10.16709 | 6.19E-75  |
| AT5TE47525 | 10.16714 | 3.25E-42  |
| AT5TE44130 | 10.17512 | 9.19E-59  |
| AT1TE52925 | 10.17516 | 6.09E-59  |
| AT5TE36945 | 10.17521 | 2.03E-79  |
| AT4TE08990 | 10.17577 | 5.62E-45  |
| AT3TE52305 | 10.18025 | 2.45E-83  |
| AT2TE63800 | 10.20003 | 5.55E-104 |
| AT2TE05665 | 10.20016 | 1.32E-19  |
| AT4TE14540 | 10.20593 | 1.32E-68  |
| AT5TE40565 | 10.20604 | 1.26E-82  |
| AT3TE60460 | 10.21013 | 1.67E-85  |
| AT3TE49090 | 10.21482 | 2.64E-63  |
| AT5TE43435 | 10.21509 | 4.15E-21  |
| AT2TE18455 | 10.21779 | 7.90E-52  |
| AT1TE43880 | 10.22631 | 1.14E-71  |
| AT2TE20220 | 10.22765 | 2.16E-91  |
| AT5TE47200 | 10.22967 | 2.06E-52  |
| AT1G51172  | 10.23179 | 3.73E-50  |
| AT4TE20815 | 10.23672 | 9.82E-35  |
| AT3TE64435 | 10.23738 | 3.94E-97  |
| AT4TE18685 | 10.24755 | 1.21E-22  |
| AT2TE11350 | 10.25374 | 3.69E-83  |
| AT5TE43260 | 10.269   | 5.64E-91  |
| AT1TE48020 | 10.27327 | 8.87E-40  |
| AT4TE13035 | 10.28189 | 8.31E-98  |
| AT5TE41980 | 10.29071 | 6.32E-79  |
| AT5TE46215 | 10.29758 | 4.47E-89  |
| AT1TE49675 | 10.30217 | 1.22E-62  |



|            |          |           |
|------------|----------|-----------|
| AT2TE48990 | 10.30219 | 1.34E-66  |
| AT5TE46220 | 10.30371 | 7.18E-40  |
| AT4TE20245 | 10.3074  | 1.99E-84  |
| AT5TE44770 | 10.31498 | 6.88E-96  |
| AT5G35070  | 10.31884 | 1.64E-20  |
| AT5TE41870 | 10.32505 | 2.88E-94  |
| AT1G20400  | 10.32545 | 6.96E-79  |
| AT4TE19915 | 10.33128 | 5.11E-85  |
| AT4TE19140 | 10.33492 | 1.52E-38  |
| AT4G08593  | 10.3401  | 6.97E-78  |
| AT1TE50860 | 10.36107 | 8.92E-101 |
| AT2G11773  | 10.36417 | 8.81E-34  |
| AT2TE11355 | 10.37142 | 3.95E-18  |
| AT5TE48820 | 10.37502 | 4.69E-55  |
| AT5TE43325 | 10.37567 | 5.40E-50  |
| AT4TE20745 | 10.38142 | 1.04E-45  |
| AT5TE44355 | 10.39141 | 2.35E-63  |
| AT5TE42255 | 10.39632 | 5.40E-28  |
| AT5TE43915 | 10.40545 | 2.25E-74  |
| AT4TE19150 | 10.40596 | 3.79E-74  |
| AT4TE20120 | 10.4114  | 4.07E-89  |
| AT1TE44125 | 10.42193 | 1.09E-72  |
| AT5TE52850 | 10.42216 | 5.74E-48  |
| AT4TE18705 | 10.4229  | 1.71E-73  |
| AT5TE65540 | 10.423   | 3.02E-96  |
| AT2TE17600 | 10.43519 | 3.59E-100 |
| AT3TE82555 | 10.4373  | 2.48E-56  |
| AT3TE61520 | 10.44564 | 9.76E-33  |
| AT3G43310  | 10.44993 | 1.58E-48  |
| AT3TE59450 | 10.46086 | 4.60E-72  |
| AT1TE51735 | 10.46742 | 6.91E-108 |
| AT1TE51105 | 10.46884 | 1.59E-27  |
| AT4G08691  | 10.47354 | 7.17E-90  |
| AT5TE69650 | 10.4757  | 1.15E-52  |
| AT3TE55395 | 10.48457 | 3.87E-103 |
| AT3TE53985 | 10.48942 | 1.62E-101 |
| AT3TE50760 | 10.48999 | 7.23E-51  |
| AT1TE45390 | 10.49049 | 1.16E-38  |
| AT1TE51065 | 10.49549 | 4.14E-52  |
| AT3TE60280 | 10.50237 | 1.95E-110 |
| AT1TE44380 | 10.50458 | 2.43E-73  |
| AT3TE60425 | 10.50499 | 1.46E-44  |
| AT3TE62975 | 10.50912 | 1.49E-80  |
| AT1TE60180 | 10.51193 | 3.29E-95  |
| AT2TE15880 | 10.51271 | 9.38E-105 |
| AT1TE42210 | 10.51802 | 5.22E-47  |
| AT3TE62785 | 10.52325 | 5.51E-82  |
| AT4TE10350 | 10.52421 | 3.61E-103 |
| AT4G06688  | 10.53058 | 2.02E-40  |

|            |          |             |
|------------|----------|-------------|
| AT3TE59455 | 10.5311  | 1.48E-32    |
| AT3TE50595 | 10.53588 | 1.62E-101   |
| AT1TE38940 | 10.55135 | 2.16E-100   |
| AT3TE51325 | 10.55462 | 2.10E-98    |
| AT1TE42225 | 10.56094 | 1.82E-20    |
| AT4TE17205 | 10.56445 | 2.33E-97    |
| AT5TE43805 | 10.59277 | 3.21E-94    |
| AT1TE36570 | 10.596   | 2.52E-66    |
| AT3TE59490 | 10.60209 | 6.14E-11    |
| AT4TE17115 | 10.61173 | 5.59E-44    |
| AT5TE43275 | 10.6164  | 2.12E-14    |
| AT5TE42010 | 10.64733 | 1.65E-29    |
| AT2TE21710 | 10.65265 | 4.27E-96    |
| AT3TE51250 | 10.65401 | 5.19E-80    |
| AT5TE43980 | 10.66286 | 7.67E-95    |
| AT4TE17470 | 10.66777 | 2.58E-97    |
| AT1TE44450 | 10.66996 | 1.05E-106   |
| AT3G30230  | 10.67447 | 3.53E-35    |
| AT3TE51760 | 10.68256 | 1.01E-51    |
| AT2TE12555 | 10.68429 | 5.98E-68    |
| AT4TE09565 | 10.68741 | 4.89E-80    |
| AT1TE41230 | 10.69487 | 1.05E-106   |
| AT4TE20800 | 10.69587 | 1.23E-99    |
| AT1TE52125 | 10.69598 | 1.12E-56    |
| AT4TE13990 | 10.69598 | 6.19E-25    |
| AT1TE42890 | 10.70121 | 1.18E-101   |
| AT2TE11920 | 10.70413 | 9.38E-105   |
| AT5TE43385 | 10.71028 | 1.07E-99    |
| AT5G15360  | 10.71256 | 1.53E-62    |
| AT5G38190  | 10.7143  | 1.96E-77    |
| AT4TE15825 | 10.72222 | 6.30E-66    |
| AT5TE43940 | 10.72648 | 2.87E-93    |
| AT3TE50570 | 10.72686 | 1.30E-51    |
| AT5TE44735 | 10.73023 | 4.93E-51    |
| AT2TE12030 | 10.74156 | 1.42E-101   |
| AT5TE46855 | 10.74484 | 9.49E-33    |
| AT2TE19625 | 10.74515 | 2.77E-73    |
| AT2TE20590 | 10.75456 | 1.35E-52    |
| AT4G16215  | 10.76594 | 1.06E-90    |
| AT1TE54760 | 10.78208 | 4.69E-75    |
| AT5TE42355 | 10.7864  | 9.76E-73    |
| AT5TE41425 | 10.78676 | 9.41E-58    |
| AT1TE46575 | 10.7895  | 2.17E-70    |
| AT4TE16085 | 10.79463 | 5.53E-41    |
| AT4TE13485 | 10.79469 | 1.60E-58    |
| AT4TE09175 | 10.79917 | 1.85E-61    |
| AT1TE43975 | 10.81607 | 0.003789002 |
| AT4G29200  | 10.81635 | 7.75E-49    |
| AT5TE42135 | 10.83073 | 2.72E-71    |

|            |          |           |
|------------|----------|-----------|
| AT4TE15030 | 10.83098 | 3.18E-98  |
| AT5G03090  | 10.84204 | 7.65E-62  |
| AT3TE51380 | 10.84636 | 1.70E-13  |
| AT5TE41795 | 10.86123 | 8.56E-100 |
| AT1G59930  | 10.8734  | 7.31E-51  |
| AT5TE46685 | 10.87697 | 5.12E-47  |
| AT5TE42920 | 10.89012 | 6.23E-36  |
| AT1TE45135 | 10.89702 | 5.92E-85  |
| AT5TE42660 | 10.89752 | 2.12E-32  |
| AT5TE41070 | 10.89779 | 3.72E-72  |
| AT2TE22335 | 10.90894 | 1.16E-88  |
| AT1TE44630 | 10.91403 | 1.69E-62  |
| AT5TE41865 | 10.92473 | 3.41E-103 |
| AT5TE42940 | 10.93274 | 9.85E-23  |
| AT1TE45380 | 10.95585 | 4.35E-52  |
| AT4TE18675 | 10.97404 | 5.70E-39  |
| AT4TE18670 | 10.98537 | 1.32E-66  |
| AT5TE40425 | 10.98546 | 4.11E-97  |
| AT1TE45385 | 10.98793 | 2.20E-43  |
| AT5TE43615 | 11.00569 | 1.05E-90  |
| AT1TE48830 | 11.01434 | 1.12E-22  |
| AT5TE43665 | 11.02088 | 4.41E-105 |
| AT5TE47160 | 11.06392 | 1.22E-56  |
| AT1TE47745 | 11.06451 | 6.23E-46  |
| AT3TE61615 | 11.0682  | 2.78E-52  |
| AT5TE51685 | 11.07051 | 2.21E-100 |
| AT4TE18715 | 11.07243 | 2.40E-68  |
| AT3TE55355 | 11.07729 | 3.07E-39  |
| AT3TE59620 | 11.09828 | 2.74E-88  |
| AT5G33251  | 11.11045 | 2.68E-93  |
| AT5TE39830 | 11.11841 | 7.52E-96  |
| AT3TE60550 | 11.12134 | 8.71E-101 |
| AT2G06562  | 11.12599 | 5.80E-93  |
| AT3TE57050 | 11.14491 | 1.56E-55  |
| AT3TE51675 | 11.14815 | 7.52E-21  |
| AT2TE24385 | 11.15407 | 1.36E-106 |
| AT2TE19600 | 11.16621 | 2.40E-66  |
| AT3TE59560 | 11.1664  | 3.76E-58  |
| AT3TE57355 | 11.16868 | 7.64E-59  |
| AT2TE22520 | 11.16914 | 3.06E-51  |
| AT3TE61525 | 11.17675 | 2.41E-106 |
| AT3TE59100 | 11.18863 | 5.36E-39  |
| AT4TE13505 | 11.19307 | 1.08E-70  |
| AT3TE50605 | 11.19659 | 8.67E-30  |
| AT4TE18655 | 11.21505 | 3.48E-64  |
| AT3TE60525 | 11.25366 | 4.20E-73  |
| AT1TE46665 | 11.27144 | 3.85E-57  |
| AT3TE58580 | 11.28111 | 2.31E-35  |
| AT1TE49850 | 11.28257 | 2.25E-76  |

|            |          |             |
|------------|----------|-------------|
| AT2TE19610 | 11.31079 | 2.63E-90    |
| AT1TE72970 | 11.31972 | 1.26E-79    |
| AT3TE60430 | 11.32051 | 8.42E-56    |
| AT3TE53045 | 11.32358 | 2.23E-73    |
| AT1G47660  | 11.33839 | 8.45E-28    |
| AT5TE43625 | 11.34083 | 1.31E-68    |
| AT1G59920  | 11.35299 | 4.92E-65    |
| AT2TE19005 | 11.36225 | 1.74E-48    |
| AT4TE18060 | 11.36809 | 2.34E-61    |
| AT4TE09055 | 11.39074 | 2.44E-69    |
| AT2TE09640 | 11.3924  | 4.38E-69    |
| AT3TE55370 | 11.40979 | 7.86E-86    |
| AT3TE55340 | 11.4217  | 1.87E-79    |
| AT5TE42015 | 11.43614 | 3.47E-41    |
| AT3TE50600 | 11.44424 | 4.17E-81    |
| AT4TE20125 | 11.47612 | 1.17E-88    |
| AT4TE15945 | 11.52305 | 6.80E-67    |
| AT4TE15420 | 11.5366  | 4.98E-44    |
| AT2G10260  | 11.5535  | 1.69E-64    |
| AT5TE63610 | 11.59203 | 5.25E-82    |
| AT3TE57345 | 11.60067 | 2.27E-58    |
| AT3TE54705 | 11.60883 | 1.20E-43    |
| AT3TE53215 | 11.6111  | 3.00E-70    |
| AT4G07720  | 11.61372 | 4.50E-33    |
| AT3TE60285 | 11.62824 | 1.95E-101   |
| AT2TE17590 | 11.68483 | 2.83E-62    |
| AT2TE13360 | 11.69191 | 4.80E-62    |
| AT3TE60560 | 11.70118 | 3.53E-91    |
| AT2TE17565 | 11.74799 | 4.05E-80    |
| AT4TE23345 | 11.81224 | 4.28E-68    |
| AT1TE49955 | 11.81931 | 8.71E-93    |
| AT4TE18245 | 11.82807 | 2.75E-73    |
| AT3G24542  | 11.84072 | 1.72E-68    |
| AT2TE20205 | 11.84263 | 2.46E-75    |
| AT4TE19925 | 11.85248 | 5.06E-55    |
| AT1TE45375 | 11.92219 | 7.27E-67    |
| AT1TE62360 | 11.95818 | 9.71E-70    |
| AT3TE50675 | 11.97188 | 1.49E-70    |
| AT2TE42810 | 12.01436 | 1.19E-87    |
| AT1TE49845 | 12.04697 | 3.45E-50    |
| AT3TE54700 | 12.15932 | 5.07E-27    |
| AT4TE07420 | 12.28964 | 1.12E-74    |
| AT2G11778  | 12.38056 | 5.38E-51    |
| AT1TE54925 | 12.9133  | 5.77E-83    |
| AT3TE47975 | 13.40588 | 8.08E-91    |
| AT1TE39515 | 13.54286 | 2.33E-97    |
| AT1TE43225 | Inf      | 1.15E-08    |
| AT1G11590  | Inf      | 0.026562965 |
| AT1G11595  | Inf      | 2.18E-26    |

|            |     |             |
|------------|-----|-------------|
| AT1G19040  | Inf | 9.54E-06    |
| AT1G19610  | Inf | 0.002390176 |
| AT1G23300  | Inf | 0.000161232 |
| AT1G27461  | Inf | 0.016606787 |
| AT1G27570  | Inf | 5.65E-29    |
| AT1G30784  | Inf | 1.17E-12    |
| AT1G32000  | Inf | 4.02E-43    |
| AT1G32010  | Inf | 6.08E-49    |
| AT1G32720  | Inf | 0.045736696 |
| AT1G33010  | Inf | 1.75E-06    |
| AT1G34041  | Inf | 6.73E-05    |
| AT1G35375  | Inf | 0.010655276 |
| AT1G35500  | Inf | 7.04E-13    |
| AT1G36100  | Inf | 1.14E-19    |
| AT1G36230  | Inf | 4.89E-05    |
| AT1G36240  | Inf | 5.52E-26    |
| AT1G36510  | Inf | 8.50E-08    |
| AT1G36640  | Inf | 0.008038903 |
| AT1G36660  | Inf | 0.000784168 |
| AT1G36745  | Inf | 6.68E-34    |
| AT1G37162  | Inf | 1.02E-05    |
| AT1G40078  | Inf | 0.000141176 |
| AT1G41820  | Inf | 2.99E-06    |
| AT1G41890  | Inf | 3.99E-41    |
| AT1G42635  | Inf | 0.002830262 |
| AT1G42680  | Inf | 2.33E-24    |
| AT1G43730  | Inf | 0.047484518 |
| AT1G47765  | Inf | 0.004296365 |
| AT1G51330  | Inf | 0.01390858  |
| AT1G52950  | Inf | 0.001422506 |
| AT1G55650  | Inf | 0.01437256  |
| AT1G66920  | Inf | 0.000306578 |
| AT1G68850  | Inf | 0.011016766 |
| AT1G79130  | Inf | 0.019656931 |
| AT1TE04710 | Inf | 2.05E-13    |
| AT1TE14085 | Inf | 1.27E-63    |
| AT1TE19270 | Inf | 7.25E-05    |
| AT1TE20090 | Inf | 1.08E-10    |
| AT1TE28375 | Inf | 0.008171032 |
| AT1TE31935 | Inf | 5.66E-12    |
| AT1TE33490 | Inf | 4.74E-20    |
| AT1TE34580 | Inf | 8.68E-16    |
| AT1TE35720 | Inf | 4.76E-13    |
| AT1TE37210 | Inf | 0.000111157 |
| AT1TE37215 | Inf | 3.64E-17    |
| AT1TE37265 | Inf | 0.004611082 |
| AT1TE39375 | Inf | 1.07E-45    |
| AT1TE39880 | Inf | 0.010203723 |
| AT1TE40940 | Inf | 0.002955919 |

|            |     |             |
|------------|-----|-------------|
| AT1TE41345 | Inf | 1.02E-24    |
| AT1TE41460 | Inf | 0.032085318 |
| AT1TE41485 | Inf | 0.003401074 |
| AT1TE41580 | Inf | 4.97E-09    |
| AT1TE41735 | Inf | 0.000819059 |
| AT1TE42375 | Inf | 0.000518978 |
| AT1TE42380 | Inf | 4.84E-05    |
| AT1TE42395 | Inf | 0.004772667 |
| AT1TE42440 | Inf | 2.19E-13    |
| AT1TE42450 | Inf | 1.92E-12    |
| AT1TE42465 | Inf | 1.17E-47    |
| AT1TE42490 | Inf | 2.47E-19    |
| AT1TE43025 | Inf | 5.97E-11    |
| AT1TE43030 | Inf | 1.00E-06    |
| AT1TE43585 | Inf | 0.00090489  |
| AT1TE43910 | Inf | 0.026247902 |
| AT1TE44260 | Inf | 2.71E-08    |
| AT1TE44265 | Inf | 3.96E-15    |
| AT1TE44430 | Inf | 0.018416941 |
| AT1TE44525 | Inf | 0.000135481 |
| AT1TE44670 | Inf | 0.017358633 |
| AT1TE44825 | Inf | 5.82E-10    |
| AT1TE44875 | Inf | 4.91E-09    |
| AT1TE44905 | Inf | 8.32E-25    |
| AT1TE44910 | Inf | 4.37E-23    |
| AT1TE44945 | Inf | 0.008051925 |
| AT1TE45080 | Inf | 1.35E-06    |
| AT1TE45180 | Inf | 0.000700849 |
| AT1TE45185 | Inf | 0.006067871 |
| AT1TE45200 | Inf | 1.10E-05    |
| AT1TE45395 | Inf | 8.11E-05    |
| AT1TE45475 | Inf | 2.31E-09    |
| AT1TE45490 | Inf | 2.36E-05    |
| AT1TE45710 | Inf | 3.14E-09    |
| AT1TE45790 | Inf | 2.06E-21    |
| AT1TE45795 | Inf | 0.015842715 |
| AT1TE45870 | Inf | 6.89E-47    |
| AT1TE45955 | Inf | 0.01149715  |
| AT1TE46140 | Inf | 1.55E-21    |
| AT1TE46265 | Inf | 1.32E-19    |
| AT1TE46270 | Inf | 0.018616669 |
| AT1TE46275 | Inf | 8.21E-21    |
| AT1TE46305 | Inf | 8.09E-27    |
| AT1TE46310 | Inf | 1.46E-34    |
| AT1TE46315 | Inf | 9.79E-05    |
| AT1TE46395 | Inf | 0.045407043 |
| AT1TE46405 | Inf | 2.68E-06    |
| AT1TE46580 | Inf | 2.29E-26    |
| AT1TE46585 | Inf | 1.35E-09    |

|            |     |             |
|------------|-----|-------------|
| AT1TE46625 | Inf | 4.37E-30    |
| AT1TE46630 | Inf | 2.15E-08    |
| AT1TE46685 | Inf | 1.05E-05    |
| AT1TE46755 | Inf | 3.71E-58    |
| AT1TE46785 | Inf | 0.00991495  |
| AT1TE46795 | Inf | 1.06E-18    |
| AT1TE46805 | Inf | 1.65E-13    |
| AT1TE46825 | Inf | 1.08E-40    |
| AT1TE46960 | Inf | 2.94E-20    |
| AT1TE47035 | Inf | 1.71E-13    |
| AT1TE47130 | Inf | 0.015780742 |
| AT1TE47140 | Inf | 0.017850065 |
| AT1TE47540 | Inf | 1.56E-05    |
| AT1TE47545 | Inf | 0.024525535 |
| AT1TE47550 | Inf | 2.28E-08    |
| AT1TE47570 | Inf | 2.46E-11    |
| AT1TE47595 | Inf | 0.000292645 |
| AT1TE47630 | Inf | 0.00576389  |
| AT1TE47705 | Inf | 0.000155194 |
| AT1TE47715 | Inf | 4.08E-08    |
| AT1TE47720 | Inf | 1.41E-05    |
| AT1TE47730 | Inf | 4.00E-10    |
| AT1TE47780 | Inf | 0.003262257 |
| AT1TE47880 | Inf | 1.17E-08    |
| AT1TE48025 | Inf | 1.21E-32    |
| AT1TE48045 | Inf | 6.19E-06    |
| AT1TE49260 | Inf | 1.65E-17    |
| AT1TE49330 | Inf | 7.94E-18    |
| AT1TE49740 | Inf | 0.034871089 |
| AT1TE49755 | Inf | 7.19E-12    |
| AT1TE50895 | Inf | 7.92E-20    |
| AT1TE50985 | Inf | 0.001968643 |
| AT1TE51000 | Inf | 2.11E-11    |
| AT1TE51050 | Inf | 2.20E-06    |
| AT1TE51070 | Inf | 0.001950987 |
| AT1TE51125 | Inf | 0.02052849  |
| AT1TE51140 | Inf | 0.042794437 |
| AT1TE51175 | Inf | 1.11E-17    |
| AT1TE51180 | Inf | 0.047898279 |
| AT1TE51185 | Inf | 0.000598811 |
| AT1TE51190 | Inf | 0.007524192 |
| AT1TE51260 | Inf | 0.000280028 |
| AT1TE51265 | Inf | 0.004593908 |
| AT1TE51270 | Inf | 0.001556818 |
| AT1TE51275 | Inf | 1.88E-06    |
| AT1TE51305 | Inf | 4.05E-07    |
| AT1TE51360 | Inf | 0.002648879 |
| AT1TE51475 | Inf | 0.003209099 |
| AT1TE51485 | Inf | 0.049134386 |

|            |     |             |
|------------|-----|-------------|
| AT1TE51615 | Inf | 4.28E-15    |
| AT1TE51645 | Inf | 1.65E-21    |
| AT1TE51650 | Inf | 1.34E-10    |
| AT1TE51690 | Inf | 0.004189944 |
| AT1TE51705 | Inf | 0.005281246 |
| AT1TE51810 | Inf | 1.02E-11    |
| AT1TE51870 | Inf | 0.001172369 |
| AT1TE51900 | Inf | 1.60E-07    |
| AT1TE51910 | Inf | 9.70E-13    |
| AT1TE51950 | Inf | 8.66E-07    |
| AT1TE51960 | Inf | 9.84E-16    |
| AT1TE51985 | Inf | 1.46E-08    |
| AT1TE51990 | Inf | 3.60E-09    |
| AT1TE52025 | Inf | 0.000423497 |
| AT1TE52090 | Inf | 0.002763795 |
| AT1TE52105 | Inf | 2.33E-42    |
| AT1TE52110 | Inf | 3.20E-41    |
| AT1TE52135 | Inf | 7.50E-14    |
| AT1TE52170 | Inf | 0.021141748 |
| AT1TE52715 | Inf | 6.19E-22    |
| AT1TE52720 | Inf | 1.04E-05    |
| AT1TE52995 | Inf | 0.031544175 |
| AT1TE53000 | Inf | 0.030466034 |
| AT1TE53050 | Inf | 3.99E-33    |
| AT1TE53065 | Inf | 6.51E-64    |
| AT1TE53090 | Inf | 6.46E-39    |
| AT1TE53095 | Inf | 4.11E-44    |
| AT1TE53380 | Inf | 3.82E-18    |
| AT1TE53385 | Inf | 4.53E-24    |
| AT1TE53635 | Inf | 2.51E-42    |
| AT1TE53660 | Inf | 2.59E-29    |
| AT1TE53730 | Inf | 3.38E-05    |
| AT1TE53765 | Inf | 0.000322997 |
| AT1TE53825 | Inf | 3.88E-23    |
| AT1TE53960 | Inf | 0.000608657 |
| AT1TE53970 | Inf | 0.00291969  |
| AT1TE53985 | Inf | 5.33E-06    |
| AT1TE53995 | Inf | 2.47E-11    |
| AT1TE54000 | Inf | 0.039352958 |
| AT1TE54445 | Inf | 0.002689686 |
| AT1TE54480 | Inf | 9.72E-27    |
| AT1TE54530 | Inf | 1.85E-12    |
| AT1TE54535 | Inf | 0.025179143 |
| AT1TE54545 | Inf | 2.00E-16    |
| AT1TE54590 | Inf | 0.031189973 |
| AT1TE54650 | Inf | 4.17E-07    |
| AT1TE56120 | Inf | 3.51E-07    |
| AT1TE56235 | Inf | 8.66E-05    |
| AT1TE57045 | Inf | 1.37E-09    |



|            |     |             |
|------------|-----|-------------|
| AT1TE57220 | Inf | 1.77E-31    |
| AT1TE58075 | Inf | 1.86E-45    |
| AT1TE58490 | Inf | 5.73E-10    |
| AT1TE59135 | Inf | 3.16E-09    |
| AT1TE59175 | Inf | 1.00E-05    |
| AT1TE59745 | Inf | 2.94E-15    |
| AT1TE66380 | Inf | 2.09E-09    |
| AT1TE76735 | Inf | 0.006442142 |
| AT1TE77165 | Inf | 0.000857375 |
| AT1TE96100 | Inf | 0.001949367 |
| AT2G03934  | Inf | 5.04E-14    |
| AT2G05635  | Inf | 6.65E-10    |
| AT2G05915  | Inf | 4.38E-05    |
| AT2G06845  | Inf | 2.06E-45    |
| AT2G06904  | Inf | 0.000898459 |
| AT2G07190  | Inf | 9.88E-06    |
| AT2G07200  | Inf | 0.02160465  |
| AT2G07213  | Inf | 4.71E-21    |
| AT2G07215  | Inf | 0.014074436 |
| AT2G07240  | Inf | 5.62E-28    |
| AT2G07280  | Inf | 8.45E-06    |
| AT2G07760  | Inf | 2.29E-19    |
| AT2G09840  | Inf | 1.17E-07    |
| AT2G10430  | Inf | 1.17E-07    |
| AT2G10965  | Inf | 5.49E-05    |
| AT2G10975  | Inf | 2.22E-05    |
| AT2G11015  | Inf | 0.000282706 |
| AT2G11271  | Inf | 0.000318108 |
| AT2G11623  | Inf | 2.85E-14    |
| AT2G11930  | Inf | 7.54E-28    |
| AT2G11983  | Inf | 1.12E-50    |
| AT2G12050  | Inf | 7.56E-20    |
| AT2G12935  | Inf | 4.02E-11    |
| AT2G13150  | Inf | 0.046942966 |
| AT2G13770  | Inf | 0.000101017 |
| AT2G13950  | Inf | 0.00013568  |
| AT2G14410  | Inf | 6.18E-47    |
| AT2G15110  | Inf | 6.70E-48    |
| AT2G15420  | Inf | 5.78E-14    |
| AT2G16676  | Inf | 0.040107824 |
| AT2G18660  | Inf | 9.38E-07    |
| AT2G24750  | Inf | 4.69E-05    |
| AT2G24780  | Inf | 4.53E-08    |
| AT2G30210  | Inf | 0.044221283 |
| AT2G30750  | Inf | 0.023137002 |
| AT2G40370  | Inf | 0.011568328 |
| AT2G43865  | Inf | 1.05E-11    |
| AT2G45220  | Inf | 0.001070016 |
| AT2TE00030 | Inf | 1.53E-07    |

|            |     |             |
|------------|-----|-------------|
| AT2TE01000 | Inf | 0.014460011 |
| AT2TE02465 | Inf | 0.040496214 |
| AT2TE02595 | Inf | 8.66E-05    |
| AT2TE05410 | Inf | 5.28E-06    |
| AT2TE05440 | Inf | 9.61E-09    |
| AT2TE06040 | Inf | 0.010654364 |
| AT2TE06615 | Inf | 2.14E-38    |
| AT2TE08110 | Inf | 3.04E-06    |
| AT2TE08120 | Inf | 5.24E-13    |
| AT2TE08285 | Inf | 0.04626429  |
| AT2TE08320 | Inf | 2.46E-17    |
| AT2TE08665 | Inf | 3.66E-15    |
| AT2TE08785 | Inf | 1.12E-15    |
| AT2TE09100 | Inf | 3.76E-12    |
| AT2TE09615 | Inf | 1.37E-05    |
| AT2TE09625 | Inf | 0.000160785 |
| AT2TE09635 | Inf | 1.44E-33    |
| AT2TE10085 | Inf | 0.042034901 |
| AT2TE10265 | Inf | 2.14E-06    |
| AT2TE10495 | Inf | 0.001726066 |
| AT2TE10585 | Inf | 0.003224053 |
| AT2TE10970 | Inf | 0.006748551 |
| AT2TE10985 | Inf | 1.48E-28    |
| AT2TE11010 | Inf | 0.000199172 |
| AT2TE11015 | Inf | 3.03E-24    |
| AT2TE11050 | Inf | 3.87E-22    |
| AT2TE11110 | Inf | 7.81E-08    |
| AT2TE11145 | Inf | 1.81E-07    |
| AT2TE11315 | Inf | 6.07E-17    |
| AT2TE11360 | Inf | 4.97E-08    |
| AT2TE11515 | Inf | 3.32E-09    |
| AT2TE11540 | Inf | 1.23E-17    |
| AT2TE11555 | Inf | 1.99E-22    |
| AT2TE11560 | Inf | 5.78E-11    |
| AT2TE11760 | Inf | 0.035909082 |
| AT2TE11765 | Inf | 1.71E-14    |
| AT2TE11960 | Inf | 1.68E-54    |
| AT2TE12225 | Inf | 0.006311652 |
| AT2TE12230 | Inf | 3.07E-05    |
| AT2TE12295 | Inf | 3.37E-05    |
| AT2TE12300 | Inf | 1.05E-08    |
| AT2TE12305 | Inf | 0.008470993 |
| AT2TE12310 | Inf | 1.58E-09    |
| AT2TE12315 | Inf | 6.23E-11    |
| AT2TE12435 | Inf | 0.01301638  |
| AT2TE12450 | Inf | 0.000329533 |
| AT2TE12470 | Inf | 3.48E-24    |
| AT2TE12825 | Inf | 1.49E-55    |
| AT2TE12960 | Inf | 0.000527444 |

|            |     |             |
|------------|-----|-------------|
| AT2TE13025 | Inf | 8.49E-10    |
| AT2TE13080 | Inf | 1.32E-08    |
| AT2TE13145 | Inf | 4.61E-05    |
| AT2TE13245 | Inf | 0.023370078 |
| AT2TE13335 | Inf | 0.005761958 |
| AT2TE13340 | Inf | 8.04E-27    |
| AT2TE13355 | Inf | 8.85E-05    |
| AT2TE13385 | Inf | 0.017315557 |
| AT2TE13440 | Inf | 1.57E-15    |
| AT2TE13865 | Inf | 0.008281084 |
| AT2TE13870 | Inf | 6.05E-19    |
| AT2TE13950 | Inf | 1.21E-15    |
| AT2TE13955 | Inf | 0.000217334 |
| AT2TE15395 | Inf | 0.007958354 |
| AT2TE15400 | Inf | 2.43E-06    |
| AT2TE15410 | Inf | 2.48E-10    |
| AT2TE15570 | Inf | 3.66E-10    |
| AT2TE15590 | Inf | 3.24E-05    |
| AT2TE15920 | Inf | 0.002179385 |
| AT2TE16010 | Inf | 9.32E-10    |
| AT2TE16030 | Inf | 1.38E-31    |
| AT2TE16170 | Inf | 2.14E-05    |
| AT2TE16190 | Inf | 0.009579382 |
| AT2TE16365 | Inf | 2.52E-07    |
| AT2TE16385 | Inf | 0.002347714 |
| AT2TE16390 | Inf | 2.97E-22    |
| AT2TE16510 | Inf | 3.25E-19    |
| AT2TE16545 | Inf | 0.013437795 |
| AT2TE16560 | Inf | 9.03E-08    |
| AT2TE16565 | Inf | 0.001461165 |
| AT2TE16570 | Inf | 9.42E-14    |
| AT2TE16600 | Inf | 4.04E-07    |
| AT2TE16605 | Inf | 5.20E-09    |
| AT2TE16620 | Inf | 0.000318219 |
| AT2TE16665 | Inf | 4.06E-09    |
| AT2TE16800 | Inf | 8.91E-09    |
| AT2TE16815 | Inf | 4.79E-05    |
| AT2TE16825 | Inf | 2.21E-71    |
| AT2TE16850 | Inf | 8.53E-08    |
| AT2TE16870 | Inf | 4.34E-10    |
| AT2TE17095 | Inf | 1.33E-20    |
| AT2TE17115 | Inf | 0.010194255 |
| AT2TE17305 | Inf | 1.15E-16    |
| AT2TE17425 | Inf | 0.03237099  |
| AT2TE17555 | Inf | 5.41E-11    |
| AT2TE17640 | Inf | 3.89E-14    |
| AT2TE17645 | Inf | 0.039590523 |
| AT2TE17650 | Inf | 1.09E-22    |
| AT2TE17730 | Inf | 0.000102113 |

|            |     |             |
|------------|-----|-------------|
| AT2TE17870 | Inf | 0.001264348 |
| AT2TE17875 | Inf | 2.04E-07    |
| AT2TE17940 | Inf | 0.00011497  |
| AT2TE17985 | Inf | 5.58E-35    |
| AT2TE18005 | Inf | 0.00098295  |
| AT2TE18025 | Inf | 2.40E-08    |
| AT2TE18335 | Inf | 4.74E-20    |
| AT2TE18410 | Inf | 9.80E-44    |
| AT2TE18440 | Inf | 5.29E-32    |
| AT2TE18450 | Inf | 1.14E-51    |
| AT2TE18830 | Inf | 4.58E-07    |
| AT2TE18860 | Inf | 0.007706227 |
| AT2TE18875 | Inf | 2.28E-06    |
| AT2TE18885 | Inf | 6.05E-14    |
| AT2TE18895 | Inf | 1.70E-09    |
| AT2TE18980 | Inf | 1.01E-06    |
| AT2TE19075 | Inf | 5.50E-15    |
| AT2TE19160 | Inf | 5.86E-06    |
| AT2TE19240 | Inf | 7.04E-14    |
| AT2TE19250 | Inf | 0.041759044 |
| AT2TE19430 | Inf | 1.14E-30    |
| AT2TE19475 | Inf | 1.09E-23    |
| AT2TE19480 | Inf | 8.31E-08    |
| AT2TE19515 | Inf | 0.012066355 |
| AT2TE19535 | Inf | 0.002763781 |
| AT2TE19590 | Inf | 9.37E-63    |
| AT2TE19615 | Inf | 1.17E-42    |
| AT2TE19620 | Inf | 6.78E-14    |
| AT2TE19660 | Inf | 0.001306554 |
| AT2TE19850 | Inf | 0.012243497 |
| AT2TE19855 | Inf | 0.003906457 |
| AT2TE19970 | Inf | 1.32E-05    |
| AT2TE19980 | Inf | 0.017923601 |
| AT2TE19985 | Inf | 1.54E-07    |
| AT2TE20000 | Inf | 2.20E-19    |
| AT2TE20005 | Inf | 0.008340357 |
| AT2TE20010 | Inf | 0.013311511 |
| AT2TE20040 | Inf | 0.00241752  |
| AT2TE20045 | Inf | 0.000145993 |
| AT2TE20105 | Inf | 1.61E-11    |
| AT2TE20110 | Inf | 1.46E-05    |
| AT2TE20230 | Inf | 0.014114354 |
| AT2TE20260 | Inf | 2.45E-05    |
| AT2TE20330 | Inf | 0.01149715  |
| AT2TE20335 | Inf | 9.76E-11    |
| AT2TE20420 | Inf | 6.27E-06    |
| AT2TE20435 | Inf | 5.92E-17    |
| AT2TE20440 | Inf | 4.20E-33    |
| AT2TE20445 | Inf | 3.10E-56    |

|            |     |             |
|------------|-----|-------------|
| AT2TE20450 | Inf | 1.77E-35    |
| AT2TE20600 | Inf | 0.000341107 |
| AT2TE20605 | Inf | 6.79E-16    |
| AT2TE20665 | Inf | 1.56E-07    |
| AT2TE20735 | Inf | 4.95E-24    |
| AT2TE20930 | Inf | 0.002451037 |
| AT2TE20960 | Inf | 2.53E-08    |
| AT2TE20965 | Inf | 0.003020601 |
| AT2TE21065 | Inf | 0.032799258 |
| AT2TE21100 | Inf | 1.45E-20    |
| AT2TE21155 | Inf | 0.049312843 |
| AT2TE21295 | Inf | 1.37E-33    |
| AT2TE21450 | Inf | 5.18E-05    |
| AT2TE21525 | Inf | 5.85E-09    |
| AT2TE21530 | Inf | 4.93E-30    |
| AT2TE21535 | Inf | 3.01E-13    |
| AT2TE21545 | Inf | 2.89E-09    |
| AT2TE21555 | Inf | 6.91E-10    |
| AT2TE21610 | Inf | 0.005401354 |
| AT2TE21705 | Inf | 5.54E-05    |
| AT2TE21745 | Inf | 1.66E-11    |
| AT2TE21760 | Inf | 3.05E-12    |
| AT2TE21765 | Inf | 6.26E-09    |
| AT2TE21855 | Inf | 5.03E-49    |
| AT2TE22065 | Inf | 1.01E-22    |
| AT2TE22175 | Inf | 0.000811668 |
| AT2TE22185 | Inf | 8.70E-31    |
| AT2TE22225 | Inf | 0.017850065 |
| AT2TE22230 | Inf | 3.09E-12    |
| AT2TE22245 | Inf | 9.02E-09    |
| AT2TE22495 | Inf | 0.008823222 |
| AT2TE22505 | Inf | 7.92E-34    |
| AT2TE22550 | Inf | 1.56E-06    |
| AT2TE22565 | Inf | 0.045407043 |
| AT2TE23120 | Inf | 0.000112317 |
| AT2TE23175 | Inf | 2.23E-11    |
| AT2TE23210 | Inf | 1.70E-08    |
| AT2TE23240 | Inf | 9.66E-06    |
| AT2TE23510 | Inf | 5.84E-07    |
| AT2TE23940 | Inf | 1.54E-05    |
| AT2TE24250 | Inf | 0.002327628 |
| AT2TE24335 | Inf | 0.001468685 |
| AT2TE24850 | Inf | 0.000318108 |
| AT2TE25095 | Inf | 0.006902758 |
| AT2TE25350 | Inf | 6.92E-08    |
| AT2TE25360 | Inf | 1.08E-35    |
| AT2TE25515 | Inf | 0.000480502 |
| AT2TE25520 | Inf | 8.54E-15    |
| AT2TE25840 | Inf | 3.76E-14    |

|            |     |             |
|------------|-----|-------------|
| AT2TE26230 | Inf | 3.73E-61    |
| AT2TE26275 | Inf | 5.81E-10    |
| AT2TE26285 | Inf | 0.000307934 |
| AT2TE26360 | Inf | 0.000248719 |
| AT2TE26380 | Inf | 1.16E-30    |
| AT2TE26385 | Inf | 0.007662609 |
| AT2TE26450 | Inf | 1.35E-09    |
| AT2TE26470 | Inf | 0.000109406 |
| AT2TE26680 | Inf | 1.29E-65    |
| AT2TE26685 | Inf | 1.15E-22    |
| AT2TE26780 | Inf | 1.52E-06    |
| AT2TE26855 | Inf | 0.018216885 |
| AT2TE26875 | Inf | 8.23E-06    |
| AT2TE27460 | Inf | 2.46E-29    |
| AT2TE27470 | Inf | 4.76E-09    |
| AT2TE27950 | Inf | 0.000621873 |
| AT2TE28030 | Inf | 6.40E-25    |
| AT2TE28035 | Inf | 8.37E-05    |
| AT2TE28160 | Inf | 1.81E-12    |
| AT2TE28260 | Inf | 0.00018495  |
| AT2TE28285 | Inf | 2.74E-16    |
| AT2TE28345 | Inf | 0.009822253 |
| AT2TE28430 | Inf | 0.000705491 |
| AT2TE28565 | Inf | 0.038748558 |
| AT2TE28755 | Inf | 0.00224801  |
| AT2TE29340 | Inf | 1.39E-07    |
| AT2TE29450 | Inf | 1.07E-14    |
| AT2TE38900 | Inf | 1.08E-20    |
| AT2TE38905 | Inf | 6.40E-06    |
| AT2TE41090 | Inf | 2.07E-13    |
| AT2TE42460 | Inf | 0.004646517 |
| AT2TE45205 | Inf | 0.000811832 |
| AT2TE45465 | Inf | 2.47E-47    |
| AT2TE69490 | Inf | 9.95E-05    |
| AT2TE69630 | Inf | 1.04E-08    |
| AT2TE73030 | Inf | 0.009063879 |
| AT2TE78935 | Inf | 0.000223788 |
| AT2TE78940 | Inf | 3.74E-12    |
| AT3G10950  | Inf | 0.000261792 |
| AT3G15250  | Inf | 0.000601194 |
| AT3G23970  | Inf | 0.007435742 |
| AT3G25719  | Inf | 0.000388536 |
| AT3G25720  | Inf | 8.45E-06    |
| AT3G28410  | Inf | 2.88E-06    |
| AT3G29638  | Inf | 0.000299412 |
| AT3G30320  | Inf | 0.017674757 |
| AT3G30820  | Inf | 1.46E-59    |
| AT3G30867  | Inf | 1.99E-15    |
| AT3G31350  | Inf | 3.22E-24    |

|            |     |             |
|------------|-----|-------------|
| AT3G31430  | Inf | 0.014846627 |
| AT3G31908  | Inf | 7.97E-07    |
| AT3G31950  | Inf | 0.003015356 |
| AT3G32160  | Inf | 8.43E-06    |
| AT3G32180  | Inf | 1.80E-12    |
| AT3G33025  | Inf | 1.69E-05    |
| AT3G33205  | Inf | 0.013623801 |
| AT3G33293  | Inf | 0.020081119 |
| AT3G33393  | Inf | 0.038952756 |
| AT3G42060  | Inf | 0.000167463 |
| AT3G42628  | Inf | 0.016513213 |
| AT3G42723  | Inf | 1.13E-40    |
| AT3G43150  | Inf | 7.60E-07    |
| AT3G43290  | Inf | 0.013101206 |
| AT3G43490  | Inf | 0.024487477 |
| AT3G43572  | Inf | 0.001096512 |
| AT3G43574  | Inf | 1.03E-09    |
| AT3G43826  | Inf | 2.85E-05    |
| AT3G45510  | Inf | 8.66E-11    |
| AT3G45800  | Inf | 0.039633491 |
| AT3G45820  | Inf | 6.38E-19    |
| AT3G48058  | Inf | 0.003924473 |
| AT3G49230  | Inf | 0.007537363 |
| AT3G50320  | Inf | 0.000188613 |
| AT3G50540  | Inf | 0.000165447 |
| AT3G53910  | Inf | 2.07E-12    |
| AT3G54530  | Inf | 0.005940155 |
| AT3G58550  | Inf | 0.019808545 |
| AT3TE11850 | Inf | 0.021912808 |
| AT3TE18050 | Inf | 0.048114617 |
| AT3TE34420 | Inf | 1.14E-06    |
| AT3TE34430 | Inf | 1.23E-17    |
| AT3TE37060 | Inf | 0.011226697 |
| AT3TE37110 | Inf | 0.000446853 |
| AT3TE37690 | Inf | 1.34E-24    |
| AT3TE38565 | Inf | 0.00071987  |
| AT3TE38995 | Inf | 0.000573052 |
| AT3TE40135 | Inf | 0.001080127 |
| AT3TE40145 | Inf | 4.18E-10    |
| AT3TE40720 | Inf | 9.64E-06    |
| AT3TE41640 | Inf | 1.72E-05    |
| AT3TE42280 | Inf | 0.013175331 |
| AT3TE42490 | Inf | 0.034022241 |
| AT3TE43545 | Inf | 0.001776583 |
| AT3TE43745 | Inf | 6.51E-05    |
| AT3TE44950 | Inf | 1.28E-66    |
| AT3TE45800 | Inf | 2.28E-16    |
| AT3TE46015 | Inf | 4.98E-11    |
| AT3TE46350 | Inf | 0.00112908  |

|            |     |             |
|------------|-----|-------------|
| AT3TE47235 | Inf | 1.03E-61    |
| AT3TE47280 | Inf | 0.044141755 |
| AT3TE47370 | Inf | 2.44E-13    |
| AT3TE47560 | Inf | 0.003491491 |
| AT3TE47595 | Inf | 0.027023233 |
| AT3TE47605 | Inf | 0.042650188 |
| AT3TE47620 | Inf | 1.66E-16    |
| AT3TE47625 | Inf | 0.00055676  |
| AT3TE47755 | Inf | 1.54E-05    |
| AT3TE47770 | Inf | 1.14E-07    |
| AT3TE47775 | Inf | 2.00E-19    |
| AT3TE47890 | Inf | 0.020436378 |
| AT3TE48140 | Inf | 1.86E-11    |
| AT3TE48365 | Inf | 0.000853826 |
| AT3TE48590 | Inf | 2.73E-12    |
| AT3TE49110 | Inf | 0.008901728 |
| AT3TE49190 | Inf | 0.019214855 |
| AT3TE49420 | Inf | 7.47E-19    |
| AT3TE49545 | Inf | 4.27E-07    |
| AT3TE49720 | Inf | 2.18E-32    |
| AT3TE49725 | Inf | 7.65E-15    |
| AT3TE50020 | Inf | 6.34E-36    |
| AT3TE50030 | Inf | 1.02E-07    |
| AT3TE50035 | Inf | 8.81E-05    |
| AT3TE50040 | Inf | 2.75E-06    |
| AT3TE50050 | Inf | 4.89E-18    |
| AT3TE50055 | Inf | 0.000123063 |
| AT3TE50120 | Inf | 9.53E-07    |
| AT3TE50125 | Inf | 5.93E-19    |
| AT3TE50165 | Inf | 0.003682742 |
| AT3TE50560 | Inf | 2.17E-49    |
| AT3TE50650 | Inf | 6.91E-05    |
| AT3TE50655 | Inf | 9.78E-62    |
| AT3TE50775 | Inf | 5.48E-36    |
| AT3TE50875 | Inf | 0.002713939 |
| AT3TE51285 | Inf | 0.000846972 |
| AT3TE51290 | Inf | 1.14E-32    |
| AT3TE51300 | Inf | 1.63E-54    |
| AT3TE51535 | Inf | 2.61E-11    |
| AT3TE51590 | Inf | 0.035668976 |
| AT3TE51620 | Inf | 0.00368661  |
| AT3TE51630 | Inf | 1.18E-07    |
| AT3TE51635 | Inf | 0.042368836 |
| AT3TE51640 | Inf | 1.02E-05    |
| AT3TE51650 | Inf | 8.71E-45    |
| AT3TE51670 | Inf | 4.04E-20    |
| AT3TE51685 | Inf | 3.06E-05    |
| AT3TE51740 | Inf | 6.64E-06    |
| AT3TE51810 | Inf | 3.33E-08    |



|            |     |             |
|------------|-----|-------------|
| AT3TE51820 | Inf | 0.00286895  |
| AT3TE51895 | Inf | 5.83E-16    |
| AT3TE51900 | Inf | 2.18E-14    |
| AT3TE52020 | Inf | 4.98E-16    |
| AT3TE52215 | Inf | 4.87E-09    |
| AT3TE52225 | Inf | 0.000252263 |
| AT3TE52265 | Inf | 0.024160987 |
| AT3TE52280 | Inf | 2.82E-10    |
| AT3TE52300 | Inf | 1.02E-30    |
| AT3TE52315 | Inf | 0.044715441 |
| AT3TE52325 | Inf | 4.58E-23    |
| AT3TE52365 | Inf | 3.00E-05    |
| AT3TE52415 | Inf | 0.002621172 |
| AT3TE52445 | Inf | 1.56E-05    |
| AT3TE52510 | Inf | 4.56E-10    |
| AT3TE52550 | Inf | 1.72E-27    |
| AT3TE52630 | Inf | 6.85E-20    |
| AT3TE52665 | Inf | 1.57E-32    |
| AT3TE52800 | Inf | 2.14E-06    |
| AT3TE52805 | Inf | 0.000123612 |
| AT3TE52935 | Inf | 6.75E-10    |
| AT3TE53080 | Inf | 0.002400687 |
| AT3TE53095 | Inf | 2.61E-18    |
| AT3TE53100 | Inf | 2.95E-07    |
| AT3TE53130 | Inf | 0.000345924 |
| AT3TE53195 | Inf | 0.000823723 |
| AT3TE53490 | Inf | 0.005335045 |
| AT3TE53495 | Inf | 1.35E-09    |
| AT3TE53590 | Inf | 3.02E-08    |
| AT3TE53600 | Inf | 5.19E-13    |
| AT3TE53615 | Inf | 8.73E-10    |
| AT3TE53755 | Inf | 0.005905487 |
| AT3TE53765 | Inf | 1.30E-08    |
| AT3TE53835 | Inf | 0.001645392 |
| AT3TE53845 | Inf | 2.33E-09    |
| AT3TE53850 | Inf | 2.94E-71    |
| AT3TE53965 | Inf | 0.015431728 |
| AT3TE54000 | Inf | 4.14E-63    |
| AT3TE54180 | Inf | 1.54E-35    |
| AT3TE54185 | Inf | 5.31E-10    |
| AT3TE54385 | Inf | 0.000474318 |
| AT3TE54500 | Inf | 3.83E-18    |
| AT3TE54510 | Inf | 0.000897679 |
| AT3TE54690 | Inf | 5.02E-10    |
| AT3TE54695 | Inf | 8.16E-22    |
| AT3TE54735 | Inf | 1.96E-45    |
| AT3TE54780 | Inf | 1.84E-08    |
| AT3TE54815 | Inf | 1.39E-10    |
| AT3TE54845 | Inf | 2.24E-18    |

|            |     |             |
|------------|-----|-------------|
| AT3TE54865 | Inf | 1.78E-07    |
| AT3TE54985 | Inf | 6.79E-40    |
| AT3TE55025 | Inf | 8.85E-17    |
| AT3TE55030 | Inf | 0.000130709 |
| AT3TE55155 | Inf | 1.04E-21    |
| AT3TE55160 | Inf | 1.16E-08    |
| AT3TE55350 | Inf | 0.010195247 |
| AT3TE55425 | Inf | 0.000637603 |
| AT3TE55430 | Inf | 0.045643989 |
| AT3TE55440 | Inf | 0.001140431 |
| AT3TE56630 | Inf | 9.95E-07    |
| AT3TE56640 | Inf | 8.39E-08    |
| AT3TE56710 | Inf | 0.000126617 |
| AT3TE56730 | Inf | 0.006321257 |
| AT3TE57090 | Inf | 5.58E-05    |
| AT3TE57095 | Inf | 0.000495806 |
| AT3TE57100 | Inf | 5.51E-05    |
| AT3TE57110 | Inf | 2.36E-28    |
| AT3TE57160 | Inf | 0.009309096 |
| AT3TE57165 | Inf | 0.001387324 |
| AT3TE57215 | Inf | 0.002604917 |
| AT3TE57275 | Inf | 8.75E-15    |
| AT3TE57350 | Inf | 0.031544175 |
| AT3TE57360 | Inf | 2.35E-40    |
| AT3TE57365 | Inf | 7.14E-07    |
| AT3TE57435 | Inf | 0.000187315 |
| AT3TE57445 | Inf | 4.67E-26    |
| AT3TE57470 | Inf | 6.44E-16    |
| AT3TE57525 | Inf | 6.19E-06    |
| AT3TE57550 | Inf | 0.0085861   |
| AT3TE57555 | Inf | 0.038704344 |
| AT3TE57565 | Inf | 1.25E-15    |
| AT3TE57575 | Inf | 0.009042151 |
| AT3TE57600 | Inf | 1.13E-15    |
| AT3TE57655 | Inf | 0.048034459 |
| AT3TE57660 | Inf | 0.002267193 |
| AT3TE57670 | Inf | 0.020192678 |
| AT3TE58090 | Inf | 4.13E-09    |
| AT3TE58495 | Inf | 2.88E-09    |
| AT3TE58560 | Inf | 0.000888447 |
| AT3TE58575 | Inf | 6.91E-13    |
| AT3TE58585 | Inf | 3.76E-25    |
| AT3TE58590 | Inf | 0.005226683 |
| AT3TE58605 | Inf | 4.99E-48    |
| AT3TE58620 | Inf | 1.67E-35    |
| AT3TE58625 | Inf | 0.000124273 |
| AT3TE58630 | Inf | 5.87E-27    |
| AT3TE58655 | Inf | 8.05E-38    |
| AT3TE58720 | Inf | 0.040057786 |

|            |     |             |
|------------|-----|-------------|
| AT3TE58745 | Inf | 7.10E-05    |
| AT3TE58900 | Inf | 1.25E-40    |
| AT3TE59040 | Inf | 1.23E-08    |
| AT3TE59055 | Inf | 5.03E-05    |
| AT3TE59085 | Inf | 2.22E-10    |
| AT3TE59105 | Inf | 2.58E-31    |
| AT3TE59155 | Inf | 1.70E-16    |
| AT3TE59160 | Inf | 1.37E-08    |
| AT3TE59290 | Inf | 1.35E-06    |
| AT3TE59335 | Inf | 0.002320502 |
| AT3TE59480 | Inf | 9.58E-08    |
| AT3TE59495 | Inf | 0.000333611 |
| AT3TE59515 | Inf | 0.008107248 |
| AT3TE59535 | Inf | 0.008560524 |
| AT3TE59545 | Inf | 1.37E-09    |
| AT3TE59580 | Inf | 8.13E-05    |
| AT3TE59610 | Inf | 2.69E-36    |
| AT3TE59695 | Inf | 0.007349038 |
| AT3TE59855 | Inf | 9.21E-06    |
| AT3TE59880 | Inf | 2.02E-07    |
| AT3TE59895 | Inf | 0.013687821 |
| AT3TE60020 | Inf | 1.77E-11    |
| AT3TE60155 | Inf | 3.18E-16    |
| AT3TE60190 | Inf | 0.001355783 |
| AT3TE60205 | Inf | 4.33E-12    |
| AT3TE60295 | Inf | 1.05E-07    |
| AT3TE60410 | Inf | 1.05E-28    |
| AT3TE60465 | Inf | 3.14E-08    |
| AT3TE60555 | Inf | 4.78E-25    |
| AT3TE60610 | Inf | 6.07E-06    |
| AT3TE60915 | Inf | 0.008107248 |
| AT3TE60925 | Inf | 0.000141195 |
| AT3TE61015 | Inf | 0.012168438 |
| AT3TE61020 | Inf | 0.005632356 |
| AT3TE61070 | Inf | 3.05E-28    |
| AT3TE61205 | Inf | 0.01407397  |
| AT3TE61295 | Inf | 0.004071483 |
| AT3TE61305 | Inf | 0.037785817 |
| AT3TE61315 | Inf | 0.000567214 |
| AT3TE61400 | Inf | 9.42E-07    |
| AT3TE61480 | Inf | 1.06E-10    |
| AT3TE61530 | Inf | 5.79E-09    |
| AT3TE61535 | Inf | 1.41E-18    |
| AT3TE61610 | Inf | 2.05E-08    |
| AT3TE61640 | Inf | 4.99E-24    |
| AT3TE62020 | Inf | 0.044582419 |
| AT3TE62100 | Inf | 0.013078245 |
| AT3TE62130 | Inf | 3.57E-14    |
| AT3TE62215 | Inf | 1.45E-08    |

|            |     |             |
|------------|-----|-------------|
| AT3TE62260 | Inf | 2.90E-09    |
| AT3TE62390 | Inf | 8.24E-40    |
| AT3TE62395 | Inf | 1.05E-65    |
| AT3TE62450 | Inf | 0.015869224 |
| AT3TE62455 | Inf | 1.06E-06    |
| AT3TE62570 | Inf | 4.55E-32    |
| AT3TE62595 | Inf | 3.18E-33    |
| AT3TE62655 | Inf | 8.04E-08    |
| AT3TE62765 | Inf | 0.000403578 |
| AT3TE62770 | Inf | 0.027059688 |
| AT3TE62775 | Inf | 3.32E-07    |
| AT3TE62780 | Inf | 3.94E-15    |
| AT3TE62940 | Inf | 8.38E-12    |
| AT3TE63020 | Inf | 0.000129732 |
| AT3TE63035 | Inf | 7.75E-42    |
| AT3TE63040 | Inf | 9.10E-46    |
| AT3TE63165 | Inf | 4.77E-13    |
| AT3TE63200 | Inf | 0.038414808 |
| AT3TE63205 | Inf | 5.11E-15    |
| AT3TE63210 | Inf | 0.000298945 |
| AT3TE63465 | Inf | 4.18E-29    |
| AT3TE64770 | Inf | 4.60E-09    |
| AT3TE65100 | Inf | 1.68E-09    |
| AT3TE66875 | Inf | 1.11E-25    |
| AT3TE67295 | Inf | 4.90E-19    |
| AT3TE67540 | Inf | 2.32E-16    |
| AT3TE67745 | Inf | 0.00061943  |
| AT3TE70590 | Inf | 8.01E-07    |
| AT3TE72005 | Inf | 0.004307472 |
| AT3TE76405 | Inf | 0.001579384 |
| AT3TE90545 | Inf | 2.57E-11    |
| AT3TE90570 | Inf | 0.000669876 |
| AT3TE92350 | Inf | 4.97E-10    |
| AT3TE92910 | Inf | 0.021735873 |
| AT4G03570  | Inf | 3.66E-20    |
| AT4G03723  | Inf | 9.54E-23    |
| AT4G03930  | Inf | 5.79E-06    |
| AT4G03950  | Inf | 4.24E-41    |
| AT4G04030  | Inf | 6.49E-36    |
| AT4G04580  | Inf | 0.038805401 |
| AT4G04653  | Inf | 5.92E-05    |
| AT4G04775  | Inf | 0.000334384 |
| AT4G06608  | Inf | 2.39E-22    |
| AT4G06641  | Inf | 5.02E-14    |
| AT4G07524  | Inf | 2.72E-15    |
| AT4G07932  | Inf | 0.000747846 |
| AT4G08190  | Inf | 4.18E-10    |
| AT4G09360  | Inf | 1.52E-06    |
| AT4G10880  | Inf | 7.71E-06    |

|            |     |             |
|------------|-----|-------------|
| AT4G15393  | Inf | 4.66E-09    |
| AT4G18150  | Inf | 7.20E-55    |
| AT4G19239  | Inf | 5.55E-38    |
| AT4G20860  | Inf | 0.008043539 |
| AT4G23210  | Inf | 1.43E-06    |
| AT4G37070  | Inf | 0.039590523 |
| AT4TE00230 | Inf | 0.003909869 |
| AT4TE07395 | Inf | 0.011508083 |
| AT4TE07415 | Inf | 0.015422046 |
| AT4TE08260 | Inf | 0.039670978 |
| AT4TE08435 | Inf | 8.97E-21    |
| AT4TE08445 | Inf | 8.04E-27    |
| AT4TE08450 | Inf | 0.017612917 |
| AT4TE08455 | Inf | 0.047985414 |
| AT4TE08985 | Inf | 0.010030978 |
| AT4TE09045 | Inf | 0.01102519  |
| AT4TE09060 | Inf | 1.30E-47    |
| AT4TE09095 | Inf | 0.033887799 |
| AT4TE09130 | Inf | 0.049426033 |
| AT4TE09135 | Inf | 4.11E-13    |
| AT4TE09165 | Inf | 1.06E-05    |
| AT4TE09250 | Inf | 6.32E-10    |
| AT4TE09385 | Inf | 2.52E-16    |
| AT4TE09455 | Inf | 4.52E-07    |
| AT4TE09460 | Inf | 2.59E-10    |
| AT4TE09480 | Inf | 1.93E-18    |
| AT4TE09505 | Inf | 2.13E-21    |
| AT4TE09540 | Inf | 4.84E-05    |
| AT4TE09545 | Inf | 0.000122287 |
| AT4TE09550 | Inf | 0.001835308 |
| AT4TE09560 | Inf | 3.40E-13    |
| AT4TE09570 | Inf | 6.71E-26    |
| AT4TE09780 | Inf | 5.54E-16    |
| AT4TE09810 | Inf | 4.44E-11    |
| AT4TE09925 | Inf | 0.041806655 |
| AT4TE10210 | Inf | 3.44E-43    |
| AT4TE10255 | Inf | 0.001244445 |
| AT4TE10335 | Inf | 0.00151095  |
| AT4TE10490 | Inf | 0.031651071 |
| AT4TE10680 | Inf | 0.000114747 |
| AT4TE10980 | Inf | 0.006409951 |
| AT4TE12570 | Inf | 0.005749482 |
| AT4TE12615 | Inf | 0.009311206 |
| AT4TE12620 | Inf | 0.004018714 |
| AT4TE13060 | Inf | 6.32E-05    |
| AT4TE13065 | Inf | 0.036079004 |
| AT4TE13070 | Inf | 5.71E-25    |
| AT4TE13290 | Inf | 5.97E-06    |
| AT4TE13295 | Inf | 0.00051878  |

|            |     |             |
|------------|-----|-------------|
| AT4TE13515 | Inf | 1.09E-14    |
| AT4TE13555 | Inf | 0.000155948 |
| AT4TE13565 | Inf | 1.36E-17    |
| AT4TE13985 | Inf | 1.68E-11    |
| AT4TE14035 | Inf | 4.19E-12    |
| AT4TE14065 | Inf | 0.000160331 |
| AT4TE14130 | Inf | 1.78E-32    |
| AT4TE14135 | Inf | 3.00E-21    |
| AT4TE14210 | Inf | 0.006197241 |
| AT4TE14225 | Inf | 0.003313515 |
| AT4TE14230 | Inf | 6.21E-05    |
| AT4TE14240 | Inf | 4.66E-11    |
| AT4TE14445 | Inf | 0.000318219 |
| AT4TE14490 | Inf | 0.001036512 |
| AT4TE15005 | Inf | 4.29E-09    |
| AT4TE15010 | Inf | 0.001672727 |
| AT4TE15115 | Inf | 1.26E-07    |
| AT4TE15190 | Inf | 0.03625857  |
| AT4TE15195 | Inf | 0.00044255  |
| AT4TE15260 | Inf | 2.02E-31    |
| AT4TE15285 | Inf | 8.50E-44    |
| AT4TE15380 | Inf | 6.37E-26    |
| AT4TE15415 | Inf | 5.18E-05    |
| AT4TE15435 | Inf | 1.03E-29    |
| AT4TE15475 | Inf | 3.29E-10    |
| AT4TE15490 | Inf | 0.004673838 |
| AT4TE15495 | Inf | 0.01301638  |
| AT4TE15500 | Inf | 1.34E-11    |
| AT4TE15525 | Inf | 1.67E-12    |
| AT4TE15555 | Inf | 7.45E-15    |
| AT4TE15585 | Inf | 1.08E-25    |
| AT4TE15615 | Inf | 9.00E-07    |
| AT4TE15740 | Inf | 7.62E-08    |
| AT4TE15745 | Inf | 2.85E-07    |
| AT4TE15750 | Inf | 9.25E-19    |
| AT4TE15755 | Inf | 1.03E-15    |
| AT4TE15835 | Inf | 1.77E-60    |
| AT4TE15890 | Inf | 1.10E-42    |
| AT4TE15915 | Inf | 0.000382708 |
| AT4TE15935 | Inf | 0.001471801 |
| AT4TE15940 | Inf | 8.15E-26    |
| AT4TE16150 | Inf | 4.80E-14    |
| AT4TE16165 | Inf | 2.91E-09    |
| AT4TE16175 | Inf | 3.91E-16    |
| AT4TE16210 | Inf | 0.001840131 |
| AT4TE16230 | Inf | 2.58E-12    |
| AT4TE16235 | Inf | 0.00052451  |
| AT4TE16385 | Inf | 2.09E-22    |
| AT4TE16390 | Inf | 1.00E-52    |

|            |     |             |
|------------|-----|-------------|
| AT4TE16480 | Inf | 0.00088655  |
| AT4TE16510 | Inf | 9.56E-09    |
| AT4TE16560 | Inf | 0.007537363 |
| AT4TE16565 | Inf | 1.94E-69    |
| AT4TE16570 | Inf | 1.49E-23    |
| AT4TE16750 | Inf | 5.88E-07    |
| AT4TE16845 | Inf | 1.91E-09    |
| AT4TE16870 | Inf | 1.90E-10    |
| AT4TE16980 | Inf | 0.000224661 |
| AT4TE17065 | Inf | 0.001111617 |
| AT4TE17075 | Inf | 0.00055196  |
| AT4TE17240 | Inf | 2.89E-16    |
| AT4TE17505 | Inf | 2.17E-06    |
| AT4TE17510 | Inf | 7.16E-49    |
| AT4TE17520 | Inf | 6.25E-07    |
| AT4TE17885 | Inf | 0.001334717 |
| AT4TE17925 | Inf | 2.48E-08    |
| AT4TE18035 | Inf | 0.002901697 |
| AT4TE18065 | Inf | 0.026299639 |
| AT4TE18075 | Inf | 0.001433504 |
| AT4TE18205 | Inf | 5.97E-08    |
| AT4TE18220 | Inf | 0.013532205 |
| AT4TE18330 | Inf | 4.83E-23    |
| AT4TE18365 | Inf | 5.46E-19    |
| AT4TE18440 | Inf | 4.64E-45    |
| AT4TE18500 | Inf | 2.40E-10    |
| AT4TE18505 | Inf | 8.83E-06    |
| AT4TE18595 | Inf | 9.69E-23    |
| AT4TE18615 | Inf | 7.29E-22    |
| AT4TE18630 | Inf | 3.72E-37    |
| AT4TE18645 | Inf | 2.62E-21    |
| AT4TE18665 | Inf | 2.04E-43    |
| AT4TE18740 | Inf | 0.031970168 |
| AT4TE18755 | Inf | 0.005337688 |
| AT4TE18775 | Inf | 0.001195308 |
| AT4TE18865 | Inf | 6.76E-09    |
| AT4TE18995 | Inf | 0.000732478 |
| AT4TE19055 | Inf | 0.019527874 |
| AT4TE19135 | Inf | 1.25E-13    |
| AT4TE19380 | Inf | 0.000578612 |
| AT4TE19405 | Inf | 3.40E-11    |
| AT4TE19530 | Inf | 2.20E-05    |
| AT4TE19655 | Inf | 1.16E-12    |
| AT4TE19755 | Inf | 0.026371352 |
| AT4TE19780 | Inf | 5.03E-09    |
| AT4TE19825 | Inf | 0.01102519  |
| AT4TE19830 | Inf | 0.005565753 |
| AT4TE19850 | Inf | 0.000238224 |
| AT4TE19885 | Inf | 0.002152561 |

|            |     |             |
|------------|-----|-------------|
| AT4TE19905 | Inf | 2.67E-14    |
| AT4TE20085 | Inf | 9.10E-09    |
| AT4TE20385 | Inf | 3.89E-05    |
| AT4TE20540 | Inf | 0.009536884 |
| AT4TE20805 | Inf | 1.03E-06    |
| AT4TE20920 | Inf | 0.000196691 |
| AT4TE20930 | Inf | 0.031346627 |
| AT4TE20975 | Inf | 0.0003377   |
| AT4TE20990 | Inf | 0.02085809  |
| AT4TE21140 | Inf | 0.002313788 |
| AT4TE21180 | Inf | 6.18E-27    |
| AT4TE21185 | Inf | 4.16E-07    |
| AT4TE21520 | Inf | 0.001116132 |
| AT4TE21540 | Inf | 0.023452635 |
| AT4TE22970 | Inf | 3.28E-37    |
| AT4TE23195 | Inf | 0.024683365 |
| AT4TE23425 | Inf | 1.21E-11    |
| AT4TE23735 | Inf | 0.005446456 |
| AT4TE23825 | Inf | 1.14E-24    |
| AT4TE24480 | Inf | 0.013261812 |
| AT4TE24825 | Inf | 0.001563125 |
| AT4TE25025 | Inf | 3.16E-09    |
| AT4TE25590 | Inf | 2.11E-09    |
| AT4TE28870 | Inf | 9.75E-09    |
| AT4TE32055 | Inf | 0.046447348 |
| AT4TE39815 | Inf | 1.52E-33    |
| AT4TE40115 | Inf | 0.002843033 |
| AT4TE44395 | Inf | 6.50E-13    |
| AT4TE44400 | Inf | 1.70E-05    |
| AT4TE45190 | Inf | 4.74E-20    |
| AT4TE46310 | Inf | 2.11E-41    |
| AT4TE47620 | Inf | 3.76E-07    |
| AT4TE54700 | Inf | 1.99E-05    |
| AT4TE80960 | Inf | 0.00392763  |
| AT5G01080  | Inf | 8.05E-49    |
| AT5G07570  | Inf | 6.39E-08    |
| AT5G13900  | Inf | 0.047985414 |
| AT5G15420  | Inf | 3.51E-18    |
| AT5G24480  | Inf | 4.11E-52    |
| AT5G26840  | Inf | 0.001992239 |
| AT5G27340  | Inf | 8.37E-05    |
| AT5G28052  | Inf | 7.99E-40    |
| AT5G28090  | Inf | 6.99E-13    |
| AT5G28550  | Inf | 0.004602667 |
| AT5G28560  | Inf | 7.65E-15    |
| AT5G28780  | Inf | 0.005396706 |
| AT5G28800  | Inf | 3.35E-30    |
| AT5G28823  | Inf | 3.44E-30    |
| AT5G28824  | Inf | 1.18E-42    |



|            |     |             |
|------------|-----|-------------|
| AT5G29050  | Inf | 0.019404552 |
| AT5G29807  | Inf | 9.48E-15    |
| AT5G30420  | Inf | 1.69E-39    |
| AT5G32471  | Inf | 2.09E-22    |
| AT5G32613  | Inf | 6.22E-41    |
| AT5G33210  | Inf | 6.75E-10    |
| AT5G33310  | Inf | 1.78E-58    |
| AT5G33806  | Inf | 3.33E-19    |
| AT5G33898  | Inf | 2.75E-07    |
| AT5G34581  | Inf | 0.03919878  |
| AT5G34832  | Inf | 0.011755739 |
| AT5G34848  | Inf | 4.62E-05    |
| AT5G35050  | Inf | 0.000261231 |
| AT5G35120  | Inf | 2.16E-09    |
| AT5G35375  | Inf | 1.04E-39    |
| AT5G35603  | Inf | 1.22E-19    |
| AT5G35796  | Inf | 1.54E-11    |
| AT5G35890  | Inf | 1.25E-30    |
| AT5G35932  | Inf | 1.50E-20    |
| AT5G36228  | Inf | 1.37E-15    |
| AT5G37560  | Inf | 0.041748436 |
| AT5G40430  | Inf | 1.08E-05    |
| AT5G44585  | Inf | 0.024154649 |
| AT5G48860  | Inf | 5.26E-05    |
| AT5G56920  | Inf | 0.031291437 |
| AT5G60560  | Inf | 2.11E-05    |
| AT5TE00230 | Inf | 4.38E-46    |
| AT5TE00870 | Inf | 0.012078124 |
| AT5TE08220 | Inf | 3.23E-56    |
| AT5TE08870 | Inf | 2.22E-07    |
| AT5TE14165 | Inf | 0.001288187 |
| AT5TE15640 | Inf | 6.07E-30    |
| AT5TE15645 | Inf | 0.030822428 |
| AT5TE18895 | Inf | 8.90E-26    |
| AT5TE18900 | Inf | 1.27E-12    |
| AT5TE26805 | Inf | 7.49E-26    |
| AT5TE29520 | Inf | 0.008004283 |
| AT5TE32880 | Inf | 2.88E-05    |
| AT5TE34435 | Inf | 5.73E-13    |
| AT5TE34730 | Inf | 3.30E-51    |
| AT5TE34960 | Inf | 1.25E-24    |
| AT5TE35185 | Inf | 5.49E-23    |
| AT5TE35205 | Inf | 0.001770898 |
| AT5TE35240 | Inf | 0.006924652 |
| AT5TE35260 | Inf | 3.50E-23    |
| AT5TE35265 | Inf | 6.84E-49    |
| AT5TE35705 | Inf | 0.005905487 |
| AT5TE36160 | Inf | 3.21E-12    |
| AT5TE36235 | Inf | 4.82E-17    |

|            |     |             |
|------------|-----|-------------|
| AT5TE36330 | Inf | 1.60E-08    |
| AT5TE36335 | Inf | 1.26E-31    |
| AT5TE36620 | Inf | 1.40E-43    |
| AT5TE36720 | Inf | 2.42E-13    |
| AT5TE36725 | Inf | 1.90E-09    |
| AT5TE36730 | Inf | 4.80E-08    |
| AT5TE36735 | Inf | 3.53E-05    |
| AT5TE36805 | Inf | 3.05E-31    |
| AT5TE36825 | Inf | 3.63E-17    |
| AT5TE36840 | Inf | 0.000302717 |
| AT5TE36845 | Inf | 8.40E-12    |
| AT5TE36975 | Inf | 9.64E-06    |
| AT5TE37665 | Inf | 3.40E-35    |
| AT5TE37825 | Inf | 3.21E-12    |
| AT5TE38025 | Inf | 6.00E-05    |
| AT5TE38280 | Inf | 3.97E-10    |
| AT5TE38345 | Inf | 0.026348928 |
| AT5TE38350 | Inf | 2.12E-07    |
| AT5TE38370 | Inf | 0.011226697 |
| AT5TE38615 | Inf | 1.94E-63    |
| AT5TE38635 | Inf | 0.000223788 |
| AT5TE38650 | Inf | 0.000111287 |
| AT5TE38710 | Inf | 0.004642926 |
| AT5TE38945 | Inf | 1.54E-13    |
| AT5TE38995 | Inf | 0.02205143  |
| AT5TE39045 | Inf | 1.94E-11    |
| AT5TE39085 | Inf | 1.11E-12    |
| AT5TE39090 | Inf | 5.73E-43    |
| AT5TE39275 | Inf | 1.46E-08    |
| AT5TE39295 | Inf | 0.001042462 |
| AT5TE39320 | Inf | 2.24E-21    |
| AT5TE39415 | Inf | 2.45E-09    |
| AT5TE39420 | Inf | 1.98E-15    |
| AT5TE39560 | Inf | 0.005065949 |
| AT5TE39850 | Inf | 7.29E-20    |
| AT5TE40080 | Inf | 0.043368744 |
| AT5TE40085 | Inf | 0.02499153  |
| AT5TE40105 | Inf | 7.23E-05    |
| AT5TE40120 | Inf | 0.000419861 |
| AT5TE40130 | Inf | 1.49E-06    |
| AT5TE40195 | Inf | 1.49E-06    |
| AT5TE40235 | Inf | 0.004015463 |
| AT5TE40310 | Inf | 6.24E-18    |
| AT5TE40380 | Inf | 1.51E-09    |
| AT5TE40410 | Inf | 0.028196442 |
| AT5TE40505 | Inf | 5.76E-23    |
| AT5TE40520 | Inf | 1.26E-07    |
| AT5TE40530 | Inf | 1.62E-06    |
| AT5TE40570 | Inf | 0.004091287 |

|            |     |             |
|------------|-----|-------------|
| AT5TE40580 | Inf | 4.09E-10    |
| AT5TE40835 | Inf | 6.57E-14    |
| AT5TE41090 | Inf | 1.75E-09    |
| AT5TE41135 | Inf | 5.25E-11    |
| AT5TE41185 | Inf | 1.52E-08    |
| AT5TE41265 | Inf | 7.64E-41    |
| AT5TE41270 | Inf | 1.23E-20    |
| AT5TE41315 | Inf | 2.00E-16    |
| AT5TE41320 | Inf | 1.51E-09    |
| AT5TE41325 | Inf | 8.34E-12    |
| AT5TE41355 | Inf | 2.45E-07    |
| AT5TE41360 | Inf | 0.000106507 |
| AT5TE41395 | Inf | 1.56E-05    |
| AT5TE41545 | Inf | 0.012144542 |
| AT5TE41550 | Inf | 0.000141774 |
| AT5TE41600 | Inf | 2.88E-16    |
| AT5TE41610 | Inf | 2.65E-05    |
| AT5TE41615 | Inf | 6.31E-17    |
| AT5TE41780 | Inf | 0.0239003   |
| AT5TE41815 | Inf | 0.029838812 |
| AT5TE41825 | Inf | 0.000156029 |
| AT5TE41900 | Inf | 0.022447916 |
| AT5TE42030 | Inf | 0.001350076 |
| AT5TE42040 | Inf | 1.15E-06    |
| AT5TE42190 | Inf | 3.75E-05    |
| AT5TE42250 | Inf | 6.86E-35    |
| AT5TE42265 | Inf | 1.13E-26    |
| AT5TE42345 | Inf | 1.50E-18    |
| AT5TE42680 | Inf | 9.34E-18    |
| AT5TE42855 | Inf | 2.79E-09    |
| AT5TE42865 | Inf | 3.77E-26    |
| AT5TE42900 | Inf | 2.27E-34    |
| AT5TE42915 | Inf | 1.99E-07    |
| AT5TE42930 | Inf | 2.86E-06    |
| AT5TE42935 | Inf | 0.009078037 |
| AT5TE42985 | Inf | 1.09E-06    |
| AT5TE43045 | Inf | 0.000179344 |
| AT5TE43060 | Inf | 2.11E-36    |
| AT5TE43075 | Inf | 1.66E-27    |
| AT5TE43190 | Inf | 2.75E-43    |
| AT5TE43205 | Inf | 3.76E-11    |
| AT5TE43215 | Inf | 2.25E-44    |
| AT5TE43235 | Inf | 0.033319879 |
| AT5TE43240 | Inf | 1.55E-30    |
| AT5TE43255 | Inf | 1.04E-34    |
| AT5TE43290 | Inf | 0.00194517  |
| AT5TE43300 | Inf | 0.000486428 |
| AT5TE43310 | Inf | 0.000106516 |
| AT5TE43315 | Inf | 1.55E-21    |

|            |     |             |
|------------|-----|-------------|
| AT5TE43350 | Inf | 8.89E-15    |
| AT5TE43365 | Inf | 0.004104226 |
| AT5TE43375 | Inf | 3.89E-27    |
| AT5TE43400 | Inf | 2.78E-10    |
| AT5TE43520 | Inf | 4.50E-08    |
| AT5TE43575 | Inf | 2.47E-29    |
| AT5TE43630 | Inf | 4.41E-12    |
| AT5TE43635 | Inf | 5.82E-23    |
| AT5TE43765 | Inf | 5.34E-09    |
| AT5TE43800 | Inf | 3.66E-50    |
| AT5TE43825 | Inf | 4.81E-32    |
| AT5TE43905 | Inf | 1.28E-12    |
| AT5TE43990 | Inf | 2.01E-07    |
| AT5TE44070 | Inf | 6.13E-09    |
| AT5TE44110 | Inf | 1.26E-11    |
| AT5TE44205 | Inf | 3.42E-05    |
| AT5TE44255 | Inf | 5.07E-06    |
| AT5TE44360 | Inf | 0.000193176 |
| AT5TE44370 | Inf | 7.29E-05    |
| AT5TE44555 | Inf | 0.000103139 |
| AT5TE44745 | Inf | 0.000964706 |
| AT5TE44750 | Inf | 6.72E-23    |
| AT5TE44850 | Inf | 0.041377986 |
| AT5TE44895 | Inf | 0.003686279 |
| AT5TE44940 | Inf | 1.20E-08    |
| AT5TE44960 | Inf | 3.42E-08    |
| AT5TE45000 | Inf | 4.17E-14    |
| AT5TE45020 | Inf | 1.97E-09    |
| AT5TE45055 | Inf | 7.71E-16    |
| AT5TE45060 | Inf | 2.38E-16    |
| AT5TE45065 | Inf | 8.90E-17    |
| AT5TE45075 | Inf | 0.03016239  |
| AT5TE45080 | Inf | 4.44E-22    |
| AT5TE45090 | Inf | 5.37E-07    |
| AT5TE45100 | Inf | 0.004929085 |
| AT5TE45105 | Inf | 0.013336623 |
| AT5TE45110 | Inf | 0.002433383 |
| AT5TE45115 | Inf | 0.000446103 |
| AT5TE45895 | Inf | 1.24E-14    |
| AT5TE45905 | Inf | 4.92E-16    |
| AT5TE46040 | Inf | 4.64E-21    |
| AT5TE46045 | Inf | 1.59E-17    |
| AT5TE46090 | Inf | 0.010353455 |
| AT5TE46100 | Inf | 2.55E-24    |
| AT5TE46120 | Inf | 6.65E-09    |
| AT5TE46160 | Inf | 2.79E-13    |
| AT5TE46235 | Inf | 3.04E-19    |
| AT5TE46250 | Inf | 0.002159152 |
| AT5TE46255 | Inf | 3.86E-05    |

|            |     |             |
|------------|-----|-------------|
| AT5TE46265 | Inf | 0.003883423 |
| AT5TE46310 | Inf | 0.013107356 |
| AT5TE46355 | Inf | 0.013704612 |
| AT5TE46365 | Inf | 0.042446708 |
| AT5TE46415 | Inf | 0.041896112 |
| AT5TE46440 | Inf | 9.80E-06    |
| AT5TE46490 | Inf | 0.00073194  |
| AT5TE46515 | Inf | 7.68E-07    |
| AT5TE46800 | Inf | 0.000169212 |
| AT5TE46815 | Inf | 1.46E-06    |
| AT5TE46850 | Inf | 2.56E-14    |
| AT5TE46910 | Inf | 7.11E-69    |
| AT5TE46970 | Inf | 0.000552847 |
| AT5TE47085 | Inf | 0.043639488 |
| AT5TE47115 | Inf | 2.16E-26    |
| AT5TE47155 | Inf | 2.89E-24    |
| AT5TE47395 | Inf | 8.63E-06    |
| AT5TE47465 | Inf | 0.005509875 |
| AT5TE47475 | Inf | 9.11E-09    |
| AT5TE47505 | Inf | 2.40E-18    |
| AT5TE47520 | Inf | 1.65E-39    |
| AT5TE47990 | Inf | 0.016609865 |
| AT5TE48195 | Inf | 3.72E-29    |
| AT5TE49130 | Inf | 4.41E-43    |
| AT5TE49765 | Inf | 3.55E-06    |
| AT5TE50115 | Inf | 5.41E-09    |
| AT5TE50150 | Inf | 1.24E-17    |
| AT5TE50490 | Inf | 0.005141138 |
| AT5TE50960 | Inf | 9.29E-62    |
| AT5TE50990 | Inf | 0.014742159 |
| AT5TE50995 | Inf | 0.001115047 |
| AT5TE51000 | Inf | 9.51E-14    |
| AT5TE52345 | Inf | 9.20E-10    |
| AT5TE52795 | Inf | 1.83E-07    |
| AT5TE52845 | Inf | 5.88E-38    |
| AT5TE54505 | Inf | 7.08E-09    |
| AT5TE54510 | Inf | 6.08E-39    |
| AT5TE54515 | Inf | 2.56E-24    |
| AT5TE54520 | Inf | 0.000686977 |
| AT5TE55155 | Inf | 2.01E-05    |
| AT5TE55160 | Inf | 0.00019976  |
| AT5TE55925 | Inf | 2.51E-08    |
| AT5TE56030 | Inf | 0.001812775 |
| AT5TE57495 | Inf | 4.26E-38    |
| AT5TE57500 | Inf | 0.022447916 |
| AT5TE61740 | Inf | 2.28E-24    |
| AT5TE62545 | Inf | 5.51E-14    |
| AT5TE66505 | Inf | 2.37E-18    |
| AT5TE66550 | Inf | 0.018396797 |

|            |     |             |
|------------|-----|-------------|
| AT5TE68140 | Inf | 0.000290382 |
| AT5TE72235 | Inf | 0.006147289 |
| AT5TE74320 | Inf | 5.08E-28    |
| AT5TE81385 | Inf | 3.33E-22    |
| AT5TE86415 | Inf | 0.006311652 |
| AT5TE95120 | Inf | 2.06E-09    |
